1 **Title:** Paving the way for human vaccination against Rift Valley fever virus:

2 A systematic literature review of RVFV epidemiology from 1999 to 2021

3

4 **Short Title:** Review of RVFV epidemiology for a human vaccination trial

5 **Authors:** Keli N. Gerken<sup>1</sup>, A. Desirée LaBeaud<sup>1</sup>, Henshaw Mandi<sup>2</sup>, Maïna L’Azou

6 Jackson<sup>3</sup>, J. Gabrielle Breugelmans<sup>2</sup>, Charles H. King<sup>4\*</sup>

7 <sup>1</sup>Division of Pediatric Infectious Diseases, Department of Pediatrics, Stanford University

8 School of Medicine, Stanford, California, USA

9 <sup>2</sup>Coalition for Epidemic Preparedness Innovations (CEPI), Oslo, Norway

10 <sup>3</sup>Coalition for Epidemic Preparedness Innovations (CEPI), London, UK

11 <sup>4</sup>Center for Global Health and Diseases, Department of Pathology, Case Western

12 Reserve University School of Medicine, Cleveland, Ohio, USA

13

14 Word count, abstract: 332

15 Word count, manuscript: 11402

16 Tables: 3 (13 supplementary)

17 Figures: 10 (3 supplementary)

18

19 \*Corresponding author:

20 Email: [charlesking48@gmail.com](mailto:charlesking48@gmail.com) (CHK)

21

22

## 23 **Abstract**

24 **Background:** Rift Valley fever virus (RVFV) is a lethal threat to humans and  
25 livestock in many parts of Africa, Arabia, and the Indian Ocean. This systematic review's  
26 objective was to consolidate understanding of RVFV epidemiology during 1999-2021  
27 and highlight knowledge gaps relevant to plans for human vaccine trials.

28 **Methodology/Principal Findings:** The review is registered with PROSPERO  
29 (CRD42020221622). Reports of RVFV infection or exposure among humans, animals,  
30 and/or vectors in Africa, the Arabian Peninsula, and the Indian Ocean during the period  
31 January 1999 to June 2021 were eligible for inclusion. Online databases were searched  
32 for publications, and supplemental materials were recovered from official reports and  
33 research colleagues. Exposures were classified into five groups: 1) acute human RVF  
34 cases, 2) acute animal cases, 3) human RVFV sero-surveys, 4) animal sero-surveys,  
35 and 5) insect infections. Human risk factors, circulating RVFV lineages, and surveillance  
36 methods were also tabulated. In meta-analysis of risks, summary odds ratios were  
37 computed using random-effects modeling. 1104 unique human or animal RVFV  
38 transmission events were reported in 39 countries during 1999-2021. Outbreaks among  
39 humans or animals occurred at rates of 5.8/year and 12.4/year, respectively, with  
40 Mauritania, Madagascar, Kenya, South Africa, and Sudan having the most human  
41 outbreak years. Men had greater odds of RVFV infection than women, and animal  
42 contact, butchering, milking, and handling aborted material were significantly associated  
43 with greater odds of exposure. Animal risk was linked to location, proximity to water,  
44 and exposure to other herds or wildlife. RVFV was detected in a variety of mosquito  
45 vectors during interepidemic periods, confirming ongoing transmission.

46           **Conclusions/Significance:** With broad variability in surveillance, case finding,  
47 survey design, and RVFV case confirmation, combined with uncertainty about  
48 populations-at-risk, there were inconsistent results from location to location. However, it  
49 was evident that RVFV transmission is expanding its range and frequency. Gaps  
50 assessment indicated the need to harmonize human and animal surveillance and  
51 improve diagnostics and genotyping. Given the frequency of RVFV outbreaks, human  
52 vaccination has strong potential to mitigate the impact of this now widely endemic  
53 disease.

54

## 55 **Author Summary**

56           Rift Valley fever virus (RVFV) is a globally important mosquito-transmitted  
57 zoonosis that is also directly transmissible via aerosolization of body fluids from infected  
58 animals. RVFV outbreaks cause mass mortality of young livestock and pregnancy  
59 losses in both humans and animals. Severe human cases also result in hemorrhagic  
60 fever, encephalitis, and death. Loss of livestock additionally threatens the livelihood of  
61 people who depend on animals for income and food. In endemic areas, initiation of  
62 RVFV outbreaks is connected to weather events that cause excess rainfall, leading to  
63 flooding and subsequent mosquito blooms. However, the natural cycle of RVFV  
64 transmission is complex, requiring congregation of susceptible mammalian hosts and  
65 mosquito vectors in suitable environments. Several human vaccine candidates are in  
66 different stages of development, but none are yet licensed for use in human  
67 populations. In this systematic review, we assessed the 1999-2021 frequency and  
68 distribution of RVFV outbreaks among humans, animals, and vectors to identify

69 potential locations and population targets for a human RVFV vaccine efficacy trial. It  
70 focuses on current understanding of RVFV epidemiology and the identification of gaps  
71 that pose critical barriers to controlling expansion of RVFV and implementing new  
72 protective measures including human vaccination.

73

74

## 75 **Introduction**

76 Rift Valley fever virus (RVFV) remains an important emerging arboviral pathogen  
77 due to its recent geographic spread and its combined disease and financial impacts on  
78 vulnerable human populations [1]. Specifically, RVFV is listed as a priority pathogen by  
79 the World Health Organization (WHO), the Food and Agriculture Organization of the  
80 United Nations (FAO), and the U.S. Centers for Disease Control and Prevention (CDC)  
81 because of its ability to cause life-threatening hemorrhagic fever and encephalitis in  
82 humans [2, 3], its epidemic potential to cause severe harm to livestock [4, 5], and its  
83 potential for non-vector aerosol spread during epizootics and epidemics [6, 7]. The RVF  
84 virus is a member of the *Phlebovirus* genus, with three main lineages, with East African,  
85 West African, and Southern African groupings.

86 RVFV was first identified in 1931 during an investigation into an epidemic of  
87 fatalities among sheep on a farm in the Rift Valley Province of Kenya [8]. Since that  
88 time, its spatial range has continued to expand from East Africa into southern Africa,  
89 West Africa, and North Africa, and more recently outside Africa to the Arabian Peninsula  
90 [6, 7, 9]. RVFV can infect a wide range of mammalian hosts [10] and can be carried by  
91 many insect vectors. Floodwater *Aedes spp.* are important in maintenance during

92 interepidemic periods, whereas other Diptera serve as secondary vectors during  
93 outbreaks in sub-tropical and temperate regions of the world [11-15]. RVFV results in  
94 lower case fatality rates (CFR) compared to other hemorrhagic fever viruses [4], but its  
95 outbreaks have profound compounding effects on human subsistence (from loss of  
96 livestock) and on national economies, related to livestock export bans [16-19].

97         The critical environmental reservoir of RVFV is presently unknown. Humans  
98 become infected either through the bite of an infected vector or through exposure to  
99 infectious animal tissues or bodily fluids such as abortus, birthing fluids, meat, milk, or  
100 blood aerosolized during slaughtering. Other than *in utero* transmission, there is no  
101 evidence for human-human transmission of RVFV [4]. Those infected either remain  
102 minimally symptomatic or develop a mild form of the disease Rift Valley fever (RVF)  
103 (96% of patients), which is characterized by a febrile syndrome with sudden onset of flu-  
104 like fever, muscle pain, joint pain, and headache [4]. Some patients develop neck  
105 stiffness, sensitivity to light, loss of appetite and vomiting and therefore RVF can be  
106 mistaken for meningitis [20]. While most human cases are relatively mild, a small  
107 percentage of patients will develop a much more severe form of the disease [21]. This  
108 usually appears as one (or more) of three distinct syndromes: ocular (eye) disease  
109 (0.5–2% of patients), meningoencephalitis (fewer than 1% of patients) or hemorrhagic  
110 fever (fewer than 1% of patients) [4].

111         Equally important is the lethal threat to peoples' livestock. RVFV spread into  
112 naïve ecosystems is driven by infected animal movement and potentially via infected  
113 vectors [22], and can result in death of between 70-90% of young ruminants with sheep  
114 the most affected, and loss of pregnancy in nearly 100% of pregnant animals [23].

115           Outbreaks in humans and in animals do not occur at random. Instead they are  
116 strongly linked to excess rainfall and to local flooding events [24] and the consequent  
117 rise in mosquito abundance [25-32]. In addition, there is mounting evidence that  
118 suggests that there is continuing low-level RVFV transmission to humans and to  
119 animals between recognized epidemic periods [33-49]. Undetected infections,  
120 particularly in livestock, provide an important reservoir for recurrent outbreaks, leading  
121 to a continuing threat of disease in economically marginal communities and risk of  
122 further geographical expansion.

123           The specific objective of this study was to consolidate the understanding of  
124 recent RVF epidemiology over the recent 1999-2021 period. We sought to catalogue  
125 the variability of national/regional incidence and prevalence, human risk factors and  
126 populations at risk, the geospatial distribution of RVF serotypes/lineages, and the  
127 present day national and regional human and animal RVF/viral hemorrhagic fever  
128 surveillance systems. The systematic review also highlighted current knowledge gaps in  
129 RVFV epidemiology to establish the major challenges remaining for current efforts in  
130 development and testing of human vaccine.

131

## 132 **Methods**

133           To meet our study goals, we performed a systematic review of the available  
134 published literature as well as governmental monitoring and media reports of RVF  
135 activity during the period 1999-2021. The study results are reported according to the  
136 2020 Preferred Reporting Items for Systematic Reviews and Meta-Analyses (PRISMA  
137 2020) guidelines [50]. See S1 Table for details.

138           **Inclusion/exclusion criteria.** Studies included in the review were those that  
139 contained reports of human, animal, and/or vector RVFV infection or exposure among  
140 individuals (of any age) in countries across Africa, the Arabian Peninsula, and the Indian  
141 Ocean where RVFV transmission was detected during the period January 1<sup>st</sup> 1999 to  
142 June 1<sup>st</sup> 2021, including historical, observational, and prospective studies. Serosurveys  
143 from outside this target area (Spain [51, 52], Poland [53], Korea [54], and Jordan [55])  
144 were also catalogued, although not formally included in our analysis. Reports containing  
145 primary human seroprevalence or incidence data, reported RVF outbreaks or cases,  
146 details of RVF transmission, RVFV lineage distribution, and/or risk factors were  
147 included. Reports of infections among regional livestock and wildlife during the same  
148 period were also included.

149           The primary objective was to obtain population-based survey data. However,  
150 georeferenced location-specific case reports were also included in spatiotemporal  
151 analysis. There was no restriction according to the language of publication.

152           Excluded studies were those that reported laboratory-based studies or  
153 intervention trials among experimental animals in controlled settings. Reports, reviews,  
154 or opinion articles without primary data were also excluded.

155           **Information sources and search strategy.** To maximize detection of eligible RVFV  
156 transmission studies, we searched the online databases PubMed, Web of Science,  
157 African Journals Online, The Cumulative Index to Nursing and Allied Health Literature  
158 (CINAHL), The Scientific Electronic Library Online (SciELO), Elsevier, ResearchGate,  
159 and the Program for Monitoring Emerging Diseases (ProMED) listserv site. Animal  
160 outbreak data recorded by the World Organization for Animal Health (OIE) was

161 recovered from their databases, the 2005-2021 WAHIS (<https://wahis.oie.int/#/home>),  
162 and the older Handistatus II database (<https://web.oie.int/hs2>). Other sources of papers  
163 and reports that were also retrieved included: i) polling colleagues involved in RVF  
164 research or control for any non-indexed 'grey literature', ii) using Google Scholar  
165 referrals for 'similar papers', iii) scanning of literature found in personal archives, and iv)  
166 obtaining non-indexed citations found among the reference lists of the papers reviewed  
167 in our study. Unpublished data from a recent survey study in Nigeria was also included  
168 (Bonto Faburay and colleagues, personal communication). Details of the information  
169 sources and search strategy used are available in S1 Text.

170 **Selection process.** Review of titles and abstracts was performed by two trained  
171 reviewers who independently searched for data content meeting study requirements.  
172 The studies found potentially suitable for inclusion after title-abstract review were then  
173 obtained for full-text review from online or library sources. Where a single report  
174 contained data on multiple individual community surveys, each of these surveys was  
175 separately abstracted and given a unique ID number for inclusion in sub-group  
176 comparison analyses. Studies with insufficient details of the incidence or prevalence of  
177 RVFV infection were not included, and cases of duplicate publication or extended  
178 analysis of previously published data were removed from the list of selected references  
179 for this review. Full listings of included and excluded references are provided as  
180 Supporting Information files S2 and S3 Tables.

181 **Data collection process.** Included papers were abstracted by two independent  
182 reviewers, and their relevant features entered into a purpose-built database created with  
183 Google Forms. The entries were then stored in a shared master spreadsheet in Google



184 Sheets. The included papers and data registry downloads were archived in electronic  
185 text (pdf) or spreadsheet formats at the Department of Pediatrics, Stanford University  
186 School of Medicine, and at the Center for Global Health and Diseases, Case Western  
187 Reserve University.

188 **Data items.** For the human and animal RVFV exposures or clinical cases reported,  
189 information was entered into the database based on UN geographic region  
190 (<https://unstats.un.org/unsd/methodology/m49>), country, and the sub-national  
191 administrative location details that were reported. Islands in the Indian Ocean, normally  
192 classified as 'Eastern Africa' by the UN, were grouped separately for our analyses. The  
193 beginning and ending month and year of the reported RVF activity or exposure study  
194 were recorded, as well as information about whether the event was a recurrence of  
195 transmission in a previously affected area, whether there had been flooding before the  
196 event, and whether the period involved an El Nino-Southern Oscillation (ENSO) event.  
197 When outbreaks spanned more than one calendar year, the year of onset was used to  
198 classify the event. Study design and the eligible study population were recorded for  
199 each report and whether the report involved human cases, domestic or wildlife animals,  
200 or insect vectors, and the number of affected individuals by species. Where available,  
201 age and gender distributions were captured for both animal and human studies, along  
202 with any potential risk factors that were studied, and which were found to be significant  
203 by that study. Factors evaluated for human exposure risk were age and age class,  
204 gender, occupation, socio-economic status, and participation in the animal care  
205 activities of feeding, herding, sheltering, or milking livestock, as well as assisting birth,  
206 butchering, or skinning, and disposal of aborted material, or consumption of raw milk.

207 Factors evaluated for animal RVFV exposure were age and age class, sex, breed, body  
208 condition, herd size, grazing strategy, and environmental conditions including proximity  
209 to water, local vegetation, rainfall, and mosquito control measures. Our data extraction  
210 tool was designed to capture factors related to the area the animal was raised (water  
211 sources nearby, mosquito exposures, rainfall, vegetation), herd factors (grazing  
212 strategy, mosquito control measures, herd size) and individual risk factors such as body  
213 condition and breed. In some animal studies, the age of the animal (by dental  
214 examination) and sex could be objectively assessed at the time of sampling. We  
215 grouped common animal exposures and determined how many studies had assessed  
216 for the risk factor and how many individual studies found statistically significant results  
217 by bivariate or multivariate analyses. Not all studies separated the species of animals  
218 involved within each exposure, and these have been reported as “not subdivided by  
219 species.” Information was recorded on the diagnostic tests used to identify acute cases  
220 or exposures, and on each study’s criteria used to identify suspected and confirmed  
221 animal or human cases of RVF. Available information regarding local RVF surveillance  
222 methods was noted, as well as any information about the RVFV lineage involved in the  
223 reported cases. Where individual outbreaks were reported in more than one publication  
224 or governmental bulletin, case numbers and mortality for that outbreak were taken from  
225 the latest reports.

226 **Study risk of bias assessment.** We used an abridged version of the Liverpool Quality  
227 Appraisal Tool (LQAT) [56, 57] to assess study quality and risk of bias of included  
228 studies because of the tool’s flexibility in accommodating different study designs and in  
229 creating potential bias assessments specific to our diverse set of studies. Scoring

230 involved assessment of possible subject selection bias, response bias, follow up bias,  
231 bias in risk factor assessment, bias in outcome assessment, or possible bias in  
232 reporting the outcome. Scoring also included whether the study's analysis involved  
233 adjustment for potential confounders. The LQAT score, combined with recorded  
234 information about study design and power, were used to classify reports as weak (score  
235 1-5), moderate (score 6-8), or strong evidence (score 9 or 10) regarding local risk for  
236 disease or exposures. Each study was assessed independently by two reviewers with  
237 discrepancies resolved in consultation with a third reader.

238 **Effect measures.** We enumerated the cumulative number of outbreaks reported within  
239 national and sub-national borders over time, and the observed incidence or period  
240 prevalence by location. However, because of significant heterogeneity created by  
241 reporting bias, relative risk comparisons among the multiple locations were considered  
242 unreliable. Continent-wide RVF risk assessment for Africa, based on climate, weather,  
243 population, and landscape factors has been recently well studied [58-63] and so was  
244 not repeated here. We have, however, updated prior meta-analysis assessment [64] of  
245 individual human risk factors to provide evidence regarding specific sub-groups who  
246 might serve as suitable high-risk subjects for a human vaccine trial. Because the  
247 chances of infection were based on post hoc determination of exposures, summary  
248 odds ratios, derived by random effects statistical modeling, were used to determine the  
249 strength of these associations in the meta-analysis.

250 **Synthesis methods.** Outbreaks and exposures were classified into five groups: 1)  
251 acute human RVF cases, 2) acute animal cases, 3) human RVFV exposure data (based  
252 on sero-surveys), 4) animal exposure data, and 5) insect infection data. These were

253 tabulated over time and space using frequency measures and geo-located, when  
254 necessary, using Google Earth Pro software (available at  
255 <https://www.google.com/earth/versions/>). The two decades of inclusion (1999-2010 and  
256 2001-2021) were assessed jointly and then separately to determine the evolution of  
257 disease, changes in detection of disease through improved diagnostics, and the effects  
258 of more robust surveillance. Regional maps at the national and sub-national level were  
259 then prepared using QGIS software (<https://www.qgis.org/en/site/>) using base maps  
260 supplied by the Database of Global Administrative Areas (GADM) (version 3.4, (April  
261 2018, [www.gadm.org](http://www.gadm.org), licensed for non-commercial purposes). Surveillance systems in  
262 animals, humans, and vectors were categorized either as early warning systems,  
263 detection in hospital-based surveys, use of sentinel herds for surveillance, or farmer  
264 reported syndromic surveillance. For meta-analysis of individual human level risk  
265 factors, results from those included studies with relevant human exposure data were  
266 entered into Comprehensive Meta-Analysis software, v.3 (CMA, Biostat, Englewood,  
267 NJ) for calculation of pooled summary estimates of exposure effects, along with their  
268 confidence intervals. Heterogeneity levels were scored using Higgins's and Thompson's  
269  $I^2$  statistic [65]. Summary estimates of intervention effects were computed using Der  
270 Simonian and Laird random-effects modeling [66] implemented by the CMA software.  
271 Summary data were presented visually by Forest plots showing the respective odds  
272 ratio and 95% confidence interval ( $CI_{95\%}$ ) for the pooled analysis. Assessment for  
273 potential publication bias was carried out by visual inspection of funnel plots, and  
274 statistically by calculating the Egger test. To explore heterogeneity and factors that  
275 could potentially modify the summary estimates of effect, we performed subgroup

276 analyses stratified by study risk of bias, and by year of publication. For the sensitivity  
277 analysis, each meta-analysis was retested with the exclusion of one study at a time to  
278 assess the possibility of a disproportionate impact of any individual study on summary  
279 estimates.

280

## 281 **Results**

### 282 **Studies and RVFV reports selected for inclusion**

283 Initial screening of online publication databases yielded 7097 listings for RVF or RVFV  
284 during the period January 1999-June 2021 for our initial review (Fig 1). These were  
285 supplemented by 771 georeferenced outbreak case reports obtained from OIE  
286 databases World Animal Health Information System (WAHIS,  
287 <https://wahis.oie.int/#/home>) for events after 2004, and from OIE Handistatus II  
288 (<https://web.oie.int/hs2/report.asp?lang=en>) for earlier 1999-2003 events. Other  
289 sources, including private archives, governmental reports, ProMed listings, listings from  
290 previous systematic reviews [64, 67], and non-indexed citations (found in Google  
291 Scholar and in bibliographies of papers under review), provided an additional 667  
292 reports for consideration for possible inclusion. After removal of duplicates, 1976 unique  
293 articles or reports were selected for full text review. After the full text review was  
294 performed, 285 events reported in 281 publications, plus the 771 events identified in  
295 OIE databases and 48 from grey literature, identified a total of 1104 unique human or  
296 animal RVFV transmission events for inclusion in the analysis.

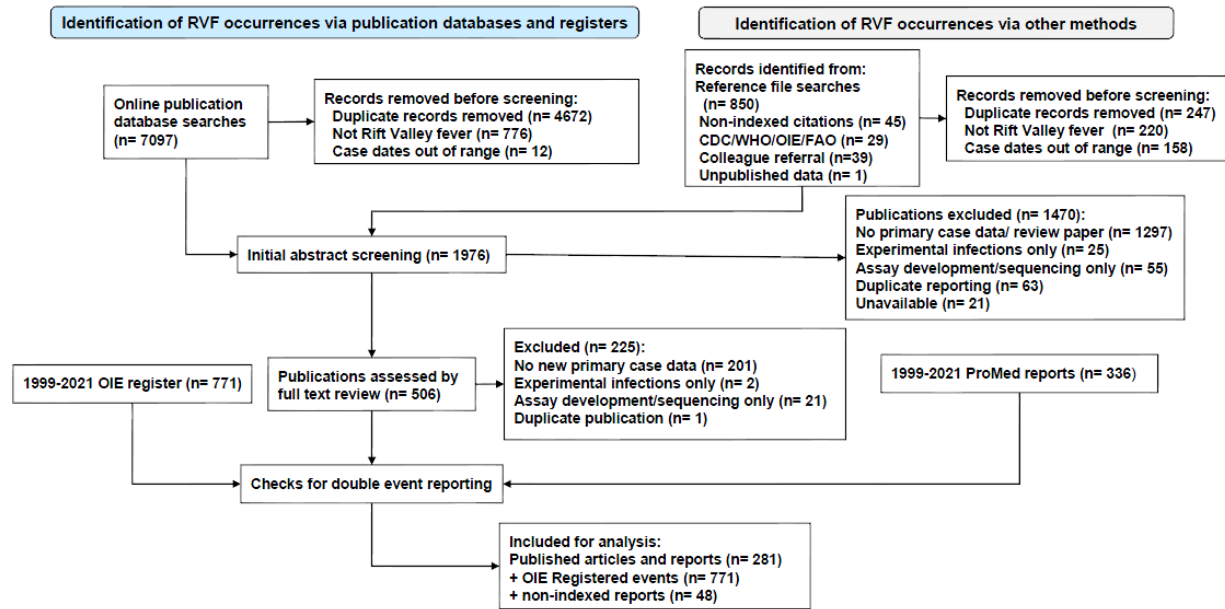

297

## 298 **Fig 1. PRISMA systematic review flow diagram of data collection and evaluation**

299 Online searches for publications and data registers (left side flow) were supplemented  
300 by governmental outbreak reports, non-indexed citations found in local archives, and  
301 citations found within the reference lists of the papers that were reviewed (right side  
302 flow). Data from one unpublished study were also included for evaluation.  
303

## 304 **Report characteristics**

305 Of the 285 included reports selected from the published literature, 91% were in peer-  
306 reviewed journals, 7% were in governmental reports, and 2% were in abstracts or  
307 published correspondence. Following the regional designations of the United Nations,  
308 43% of these papers reported RVF activity in East Africa, 13% in West Africa, 13% in  
309 the Arabian Peninsula, 10% in North Africa, and 10% in Southern Africa. The countries  
310 of Kenya (n= 42 reports), Saudi Arabia (n= 32), Tanzania (n = 24), South Africa (n= 22),  
311 Madagascar (n= 14), Sudan (n= 13), Mauritania (n= 11), and Mozambique (n= 11) were  
312 the most frequent subjects of RVF outbreak reports and surveys. Thirty percent of  
313 reports documented acute outbreaks (epidemics/epizootics), 61% were exposure  
314 studies performed during interepidemic periods, and 7% were post-epidemic survey

315 studies. One hundred sixty-five (58%) were cross-sectional surveys of humans or  
316 animals, 60 (21%) were acute case series, 35 (12%) involved prospective cohorts, and  
317 4 (1%) were case-control studies. Forty-two (15%) reported on vector testing in affected  
318 areas. Among published studies, 195 (68%) were non-randomized, 79 (28%) involved  
319 some form of random sampling, and 11 (4%) did not clearly indicate how sampling was  
320 done. In terms of study quality, the median LQAT score for published studies (where  
321 higher scores indicated higher quality studies) was 6 (range = 2-11, IQR 5-7), meaning  
322 the majority of studies had moderate-to-high risk of bias in assessing risk by location or  
323 by sub-population. Details of all included studies, including individual risk-of-bias scores  
324 are provided in S2 Table.

### 325 **Where RVFV transmission or RVF epidemics/epizootics occurred, 1999-2021**

326 Overall, 39 countries had evidence of RVFV circulation in humans, animals, or  
327 vectors during the 1999-2021 period, based on detection of probable or confirmed acute  
328 cases, positive PCR testing, or serosurvey results (Fig 2 and S4 Table). Eighty-three  
329 reports documented 124 locations in 19 countries that had 4,353 probable or confirmed  
330 acute human RVF cases and 755 deaths (Fig 3), whereas 107 reports documented  
331 acute RVF animal events (470 OIE confirmed cases) in 31 countries between 1999 and  
332 2021 (Fig 4). The median year of reported events was 2010. Outbreaks of clinical  
333 disease among humans or animals occurred at average rates of 5.8/year and 12.4/year,  
334 respectively, with Mauritania, Madagascar, Kenya, South Africa, and Sudan having the  
335 most human outbreak years. When month of onset was given for acute outbreaks  
336 reports (epizootics or epidemics), in East Africa, 77% (27/35) of outbreaks began  
337 between November and January; for southern Africa, 80% (8/10) began between March

338 and June; for West Africa, 92% (12/13) began between July and October; for the  
339 Arabian Peninsula, 93% (13/14) began between August and October; and for North  
340 Africa, 67% (6/9) began between September and October.

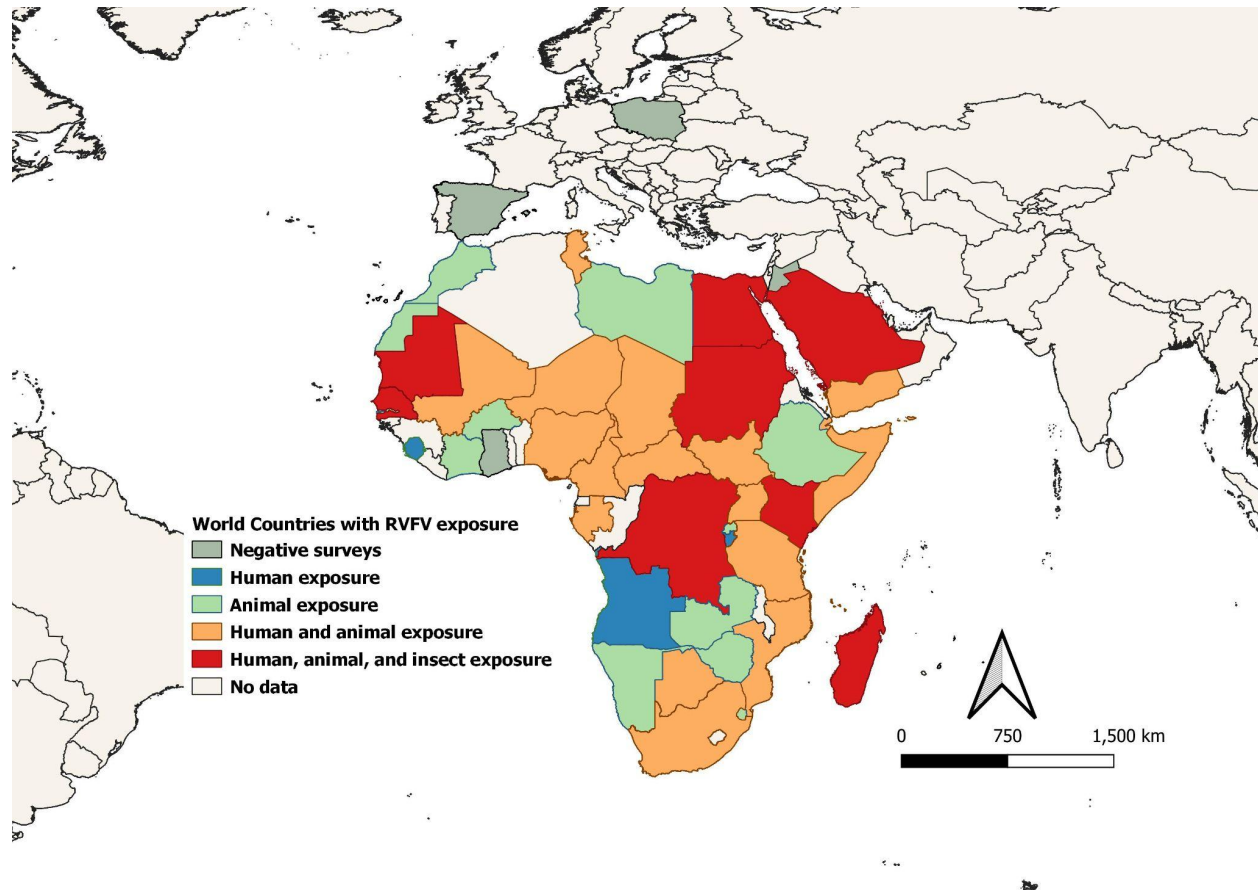

341  
342 **Fig 2. Regional map of countries exposed to RVFV infection based on findings of**  
343 **studies included in the systematic review.** Countries were categorized as to whether  
344 there was evidence of human, animal, or insect RVFV infection during the 1999-2021  
345 era.  
346

347 Maps in Figs 3 and 4 show the sub-national administrative regions where acute  
348 human and animal cases were reported during the earlier (1999-2010) or latter (2011-  
349 2021) halves of our study period, or both. The countries with multiple repeated human  
350 outbreaks across both early and later time intervals were Kenya (n=4), Mauritania (n=5),  
351 South Africa (n= 4) and Madagascar (n= 2). S5 Table lists dates, place names, GPS



352 locations, reported human case counts, incidence rates per 100,000, reported numbers  
353 of deaths, and estimated case fatality risks.

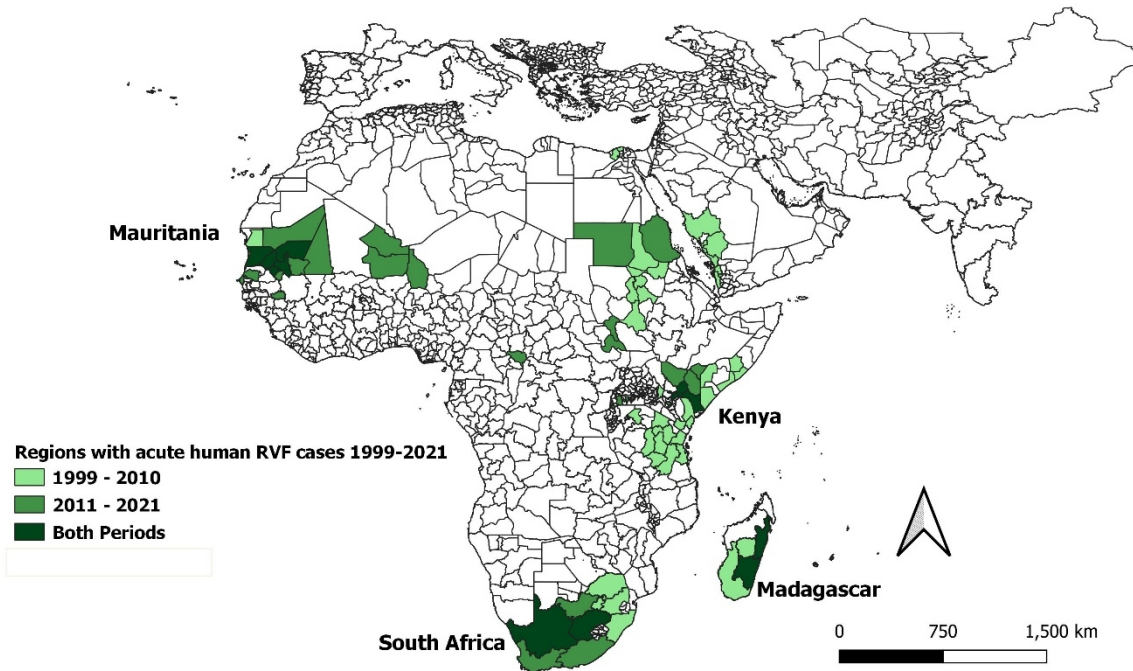

354

355 **Fig 3. Sub-national administrative regions experiencing acute human cases of**  
356 **RVF during the years 1999-2021** Locations are shaded according to whether they  
357 experienced outbreaks before or after 2011, or if they had outbreaks during both  
358 periods.  
359

360 In terms of epizootic activity, Fig 4 highlights the countries that experienced repeated  
361 acute RVF outbreaks among animals during one or both decades of the 1999-2021  
362 period. These were Kenya (n= 4), Madagascar (n= 2), Mauritania (n= 6), Mayotte (n=  
363 2), Mozambique (n=2), Senegal (n=3), and South Africa (n=4).

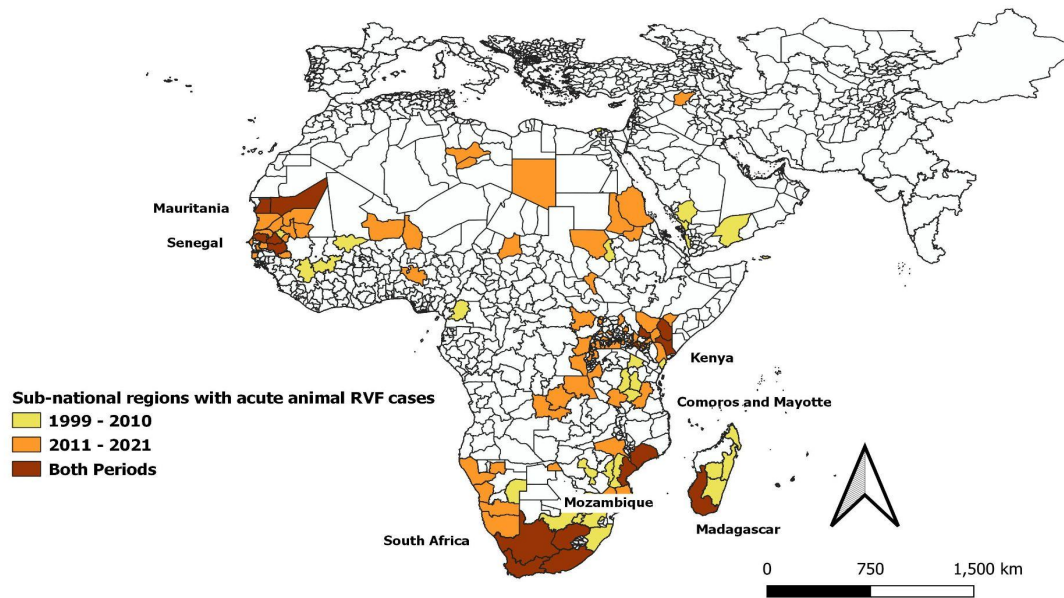

364

365 **Fig 4. Sub-national administrative regions experiencing acute animal cases of**  
366 **RVF during the years 1999-2021** Locations are shaded according to whether they  
367 experienced outbreaks before or after 2011, or during both periods of time.  
368

#### 369 **Serosurveys of human and animal RVFV exposure**

370 Of the population surveys performed during interepidemic periods to detect  
371 evidence of prior local RVFV circulation, 50 surveyed human populations, 79 surveyed  
372 livestock populations, and 23 tested local wild animals. Of these, eight jointly surveyed  
373 both humans and livestock, and nine surveyed both wildlife and livestock. A summary of  
374 available diagnostic assays used to identify anti-RVFV antibodies is presented below in  
375 Table 1.

376

377

378 **Table 1. Currently used serologic assays for detection of RVFV exposure in**  
 379 **humans.**

| <b><i>In-house Methods</i></b>               |                                         |                             |                                                                                                                                                                           |
|----------------------------------------------|-----------------------------------------|-----------------------------|---------------------------------------------------------------------------------------------------------------------------------------------------------------------------|
| <b>Method</b>                                | <b>Publication</b>                      | <b>Target antibody</b>      | <b>Brief description</b>                                                                                                                                                  |
| ELISA <sup>1</sup>                           | LaBeaud et al. 2008 [68]                | IgG                         | Indirect ELISA for presence of anti-RVFV IgG antibodies at Stanford University School of Medicine using inactivated MP-12 strain for coating antigen. Validated in humans |
| ELISA DIVA <sup>1,2</sup>                    | McElroy et al. 2009 [69]                | IgM or IgG                  | Two parallel ELISA to distinguish naturally infected from vaccination. Validated in goat and humans. Does not distinguish IgG vs IgM                                      |
| ELISA <sup>1</sup>                           | Paweska et al. 2005 [70]                | IgM and IgG                 | IgG sandwich and IgM capture assay that uses irradiated whole virus for antigen. Validated in humans                                                                      |
| ELISA <sup>1</sup>                           | Paweska et al. 2007 [71]                | IgG                         | Antigen made using recombinant N protein. Validated in humans                                                                                                             |
| ELISA <sup>1</sup>                           | Jansen Van Vuren and Paweska, 2009 [72] | IgM and IgG                 | Indirect ELISA for IgG and IgM separately. Antigen made using recombinant N protein. Validated in humans                                                                  |
| VNT <sup>3</sup>                             | Winchger Schreur et al. 2017 [73]       | All neutralizing antibodies | Uses a virulent RVFV that expresses enhanced green fluorescent protein. Not species specific                                                                              |
| Optical Fiber Infrasond Sensor               | Sobarzo et al. 2007 [74]                | IgG                         | Sandwich based ELISA and antigens are immobilized on an optical fiber that makes it more sensitive. Validated in humans                                                   |
| Luminex DIVA <sup>2</sup>                    | Van der Wal et al. 2012 [75]            | IgM and IgG                 | Bead based assay that detects RVFV Gn and N proteins                                                                                                                      |
| <b><i>Commercially available methods</i></b> |                                         |                             |                                                                                                                                                                           |
|                                              | <b>Manufacturer</b>                     |                             |                                                                                                                                                                           |
| IFA <sup>4</sup>                             | EUROIMMUN                               | IgG                         | Approved for clinical testing                                                                                                                                             |
| IFA <sup>4</sup>                             | EUROIMMUN                               | IgM                         | Approved for clinical testing                                                                                                                                             |
| ELISA <sup>1</sup>                           | Biological Diagnostic Supplies Limited  | IgM and IgG                 | Approved for clinical testing                                                                                                                                             |

|                    |        |     |                                                                                                                                  |
|--------------------|--------|-----|----------------------------------------------------------------------------------------------------------------------------------|
| ELISA <sup>1</sup> | ID-Vet | IgG | Competitive ELISA kit for the detection of anti-RVFP antibodies in serum or plasma. Multi-species that includes human validation |
| ELISA <sup>1</sup> | ID-Vet | IgM | IgM Antibody Capture ELISA for the detection of anti-nucleoprotein IgM antibodies. Validated for ruminant serum and plasma       |

380 <sup>1</sup>ELISA: enzyme-linked immunoassay <sup>2</sup>DIVA: Differentiating Infected from Vaccinated  
381 Animals <sup>3</sup>VNT: Viral neutralization test; <sup>4</sup>IFA: immunofluorescent antibody

382

383 Adapted from Petrova, et al., BMJ Glob Health 2020,doi:10.1136/bmjgh-2020-002694  
384 [76] under Creative Commons CC BY-NC

385

386 In several animal surveys performed during interepidemic periods, low rates of  
387 livestock and wildlife anti-RVFP IgM seropositivity or IgG seroconversion were detected  
388 in areas of Namibia, Senegal, South Africa, and Kenya [47, 77-79] suggesting  
389 unsuspected ongoing RVFP transmission in those locations without detection of  
390 concurrent clinical RVF cases. Also of note were animal studies that showed serologic  
391 evidence of RVFP circulation among animals or humans within areas that had no prior  
392 evidence of RVFP circulation. These were: among animals only, in Libya [OIE], Tunisia  
393 [80], and Western Sahara [81] in North Africa, but in either humans or animals in Sierra  
394 Leone [36], Côte d'Ivoire [82], Djibouti [83], Rwanda [84, 85], and eSwatini [OIE], i.e.,  
395 geographical areas in sub-Saharan Africa with no previously documented transmission.  
396 Anti-RVFP antibody testing of human patients in health centers in Ghana [86] and  
397 Jordan [55] did not detect evidence of local exposure.

### 398 **RVFP lineage studies**

399 Twenty-six papers reported on sequence analysis of RVFP isolates from recent  
400 and more distant outbreaks in an attempt to identify the geographic extent of specific  
401 viral lineages in circulation at the time. Although variants have been seen to cluster in

402 East African, West African, and Southern African groupings, the results from different  
403 studies are heterogeneous, and nomenclature for these variants has not yet been  
404 standardized. The included studies on strain and lineage are summarized in S6 Table.  
405 Differences are noted depending on the segment(s) of the viral genome analyzed, the  
406 clustering algorithm used, and the reference isolate used as a 'type specimen' for  
407 comparison.

408 Sub-lineages of the Eastern group were found in the 1997-1998 Kenya/Tanzania  
409 RVF outbreak, as well as the 2000-2001 Saudi Arabia/Yemen outbreak [87, 88]. These  
410 were most similar to the RVFV isolates from humans, animals and insects the Kenya  
411 2006-2007 epidemic (when variants termed Kenya-1, Kenya-2, and Tanzania-1 co-  
412 circulated) [87, 89]. Later 2008-2009 isolates from outbreaks in Comoros [90], Mayotte,  
413 and Madagascar [91, 92] were also from the Eastern group. Although Eastern African  
414 group isolates were recovered from Mauritania in 2010 [93] and Senegal in 2013 [94] in  
415 West Africa, outbreaks in these countries in other years have identified a separate West  
416 African lineage grouping of RVFV isolates [95, 96]. Grobbelaar and colleagues [97]  
417 have used the sequence from the viral Gn surface peptide to compare 198 isolates  
418 recovered between 1944-2010 from across Africa and the Arabian Peninsula, and have  
419 defined 15 different lineages, which they have labeled A through O. South African  
420 isolates in 2008 were grouped in the C lineage, related to the Kenya-1 lineage.  
421 However, during 2009-2011, South African isolates were predominantly found in a new,  
422 separate lineage H [98], while one isolate in Northern Cape Province was from lineage  
423 K. Lineage K was later identified in a small South African outbreak in 2018 [99], and in  
424 an RVFV-infected Chinese expatriate working in Angola in 2016 [100].

425 **Table 2. Rift Valley fever virus lineage determinations for isolates recovered in**  
 426 **recent epidemics, based on cluster analysis of gene sequences for the viral Gn**  
 427 **surface protein.** (Based on Grobbelaar, et al. 2011 [97])  
 428

| Grouping                | Grobbelaar System | Year    | Country                    | Species                    | Lineage Notes                                                              | Reference |
|-------------------------|-------------------|---------|----------------------------|----------------------------|----------------------------------------------------------------------------|-----------|
| <b>East African</b>     | lineage C         | 2000-01 | Saudi Arabia, Yemen        | Human                      | Very similar to 1997-98 isolates/variants Kenya-1, Kenya-2, and Tanzania-1 | [87, 88]  |
|                         | lineage C         | 2006-07 | Kenya                      | Humans, Livestock, Vectors |                                                                            | [87, 89]  |
|                         | N/A               | 2007    | Comoros                    | Humans                     | Similar to Kenya 2006-7                                                    | [90]      |
|                         | lineage C         |         | Madagascar                 |                            |                                                                            | [91, 92]  |
| <b>West African</b>     |                   |         | Mauritania, Senegal, Niger |                            | Related to Kenya-1 lineage                                                 | [95, 96]  |
| <b>Southern African</b> | lineage C         | 2008-09 | South Africa               |                            |                                                                            | [97]      |
|                         | lineage H         | 2009-11 | South Africa               |                            |                                                                            | [101]     |
|                         | lineage K         | 2009-11 | South Africa               |                            |                                                                            | [101]     |
|                         | lineage K         | 2018    | South Africa               |                            |                                                                            | [99]      |
|                         | lineage K         | 2016    | Angola/China               |                            |                                                                            | [100]     |

429

430 **Human outbreak characteristics**

431 During human outbreaks, surveillance and reporting efforts varied greatly from  
 432 location to location. We observed that among human outbreak reports, the calculated  
 433 incidence rates of probable or confirmed human RVFV infections among local or  
 434 regional residents varied between 0.01 and 91 per 100,000 population, with a median  
 435 value of 2.5. Case fatality risks for these probable or confirmed cases varied from zero  
 436 to 65% (median = 14.3%) in locations where more than one case was reported (n= 107  
 437 locations from 41 publications, see S5 Table).

438 The cumulative human exposure to RVFV infection is also heterogeneous across  
439 locations. In endemic areas, this cumulative exposure is usually estimated based on the  
440 population prevalence of human anti-RVFV IgG seropositivity. Among the 25 well-  
441 designed population-based serosurveys (scored as having low risk-of-bias) among our  
442 included reports (n= 44), IgG seroprevalence during interepidemic periods ranged from  
443 (0.15%) in Madagascar in 2014-2015 [40] to 22% in eastern Kenya in early 2006 [102]  
444 and again in 2013-2014 [103], with an overall median intra-epidemic value of 5.2% (IQR  
445 1.8% - 13%) seropositivity across all 25 surveys.

446  
447

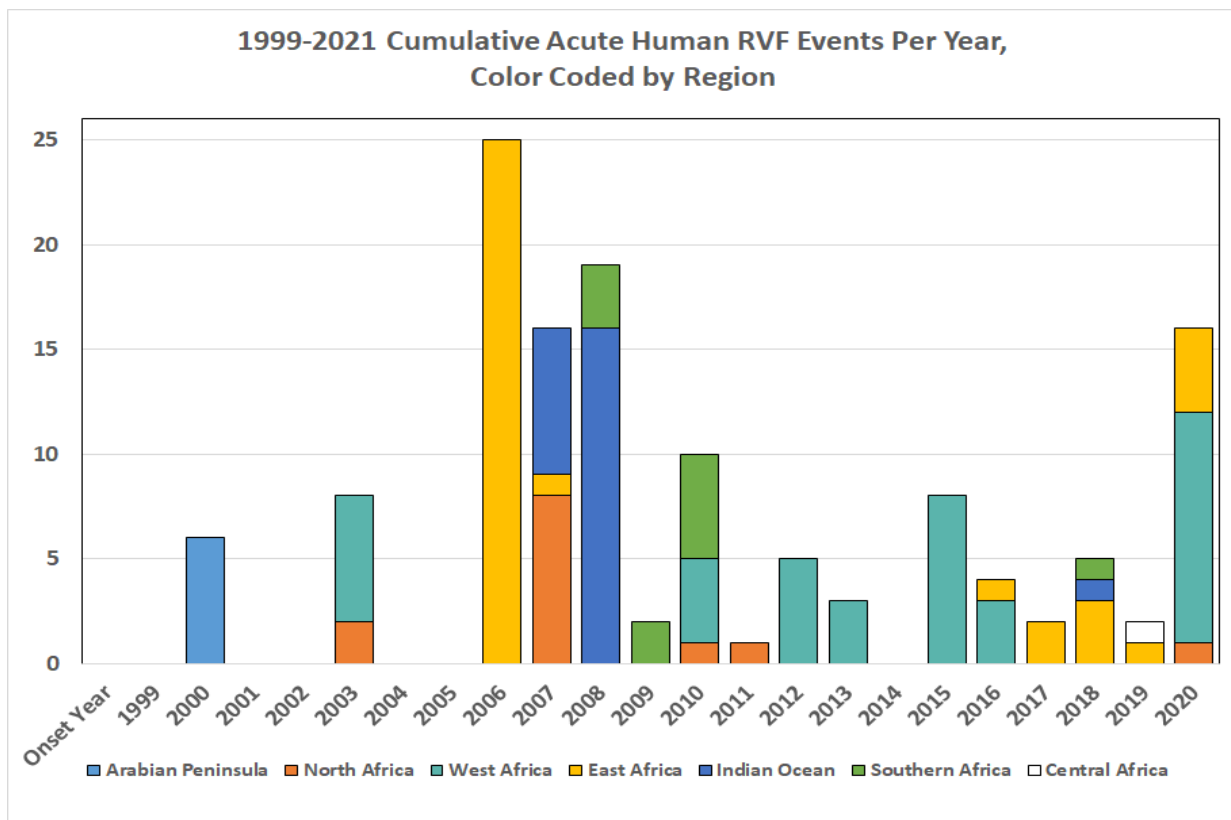

448

449 **Fig 5. Acute human RVF events per year during 1999-2021, by geographic regions**  
450 **across Africa, the Indian Ocean, and the Arabian Peninsula**

451

452 Acute human RVF outbreaks were reported across Africa, the Arabian Peninsula, and  
453 the Indian Ocean from 2000-2021 (Fig 5). The highest number of reported human RVF  
454 events occurred in 2006-7, starting in East Africa, moving to Sudan (North Africa) and  
455 then to the islands in the Indian Ocean during 2007-2008, as part of an evolving  
456 epidemic and epizootic of the East African RVFV lineage. In East Africa, new RVFV  
457 outbreaks have recurred annually since 2016, whereas no new human cases have been  
458 reported in the Arabian Peninsula since 2001. RVF flared in southern Africa in multiple  
459 episodes between 2008 and 2011 and West African countries Mauritania and/or  
460 Senegal have reported cases across multiple years, 2003. 2010, 2012-3, 2015-6, and  
461 again in 2020.

462

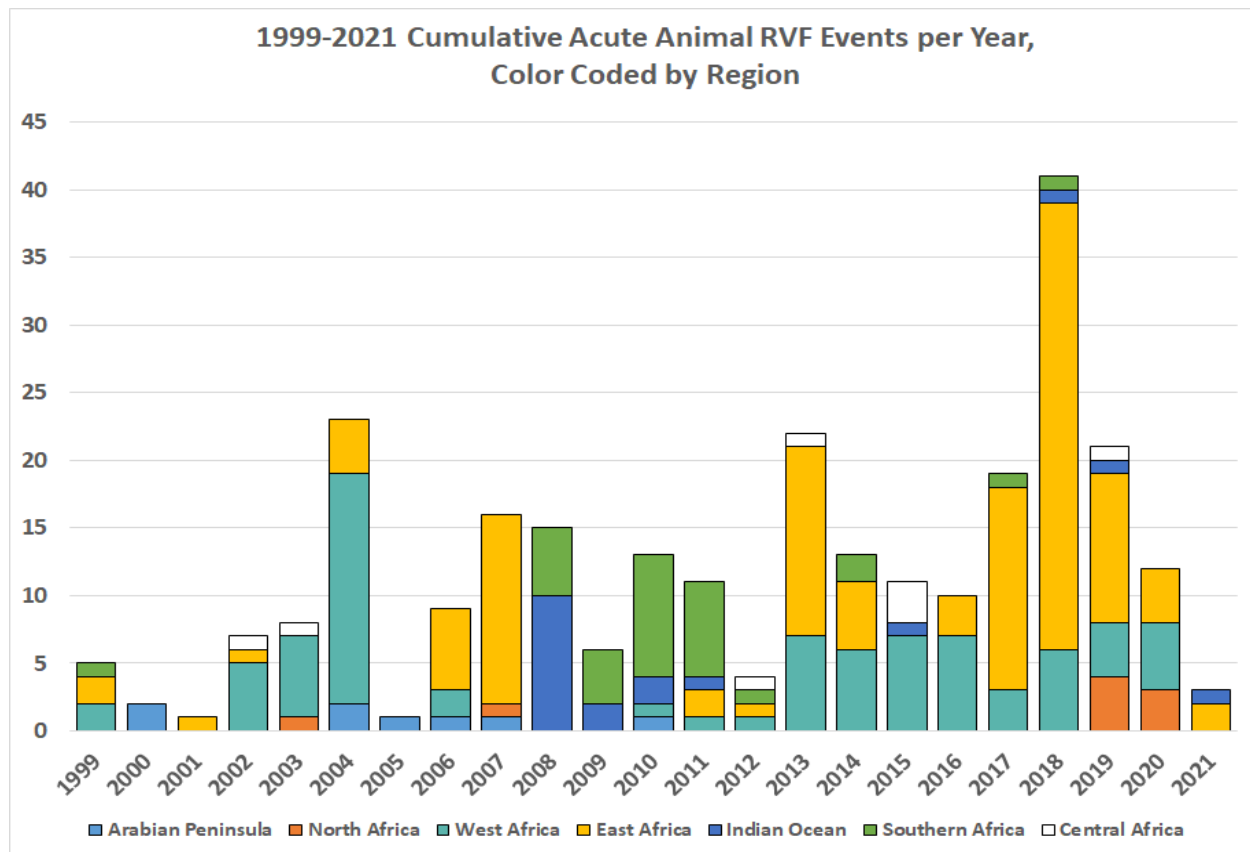

463



464 **Fig 6. Acute animal RVF events per year during 1999-2021, by geographic regions**  
465 **across Africa, the Indian Ocean, and the Arabian Peninsula**  
466

467 A larger number of acute animal RVF events (N = 273), compared to human events (N  
468 = 132), was reported during the 1999-2021 period studied. The reported animal events  
469 in southern Africa (N= 31) and in the Indian Ocean islands (N= 19) were concentrated  
470 during the 2008-2011 period (Figs. 5 and 6). By contrast, animal events in West Africa  
471 and East Africa were reported during most years of the targeted time interval  
472 (cumulative N= 80 and N=118, respectively), with the highest yearly tally being 41  
473 reported events in 2018 (Fig 6). No animal event was reported in the Arabian Peninsula  
474 after 2010, while only a low number of events were reported in Central and North  
475 African countries between 2002-2019 (cumulative N= 8 and N= 9, respectively; Fig. 6).

476 Of 28 papers that reported both human and livestock data, 17 contained  
477 information on concurrent co-local RVF epidemic and epizootic activity. These reports  
478 documented combined human/animal RVFV transmission events in Saudi Arabia [104,  
479 105] and Yemen [106] in 2000-2001; in Egypt [107] and Mauritania [108] in 2003; in  
480 Kenya [5, 89] and Tanzania [89, 109] in 2006-2007; in Mauritania in 2010 [93, 110] and  
481 again in 2012 [111]; in Senegal in 2013-2014 [94]; in Niger [96] and in Uganda [112] in  
482 2016; and in Kenya [113] , Mayotte [114], and South Africa [115] in 2018.

483 **Evidence of vector presence and competence for interepidemic RVFV**  
484 **transmission.** In S7 Table we summarize 31 published studies from 1999-2021 that  
485 tested insect vector species for RVFV infection potential. Our systematic review  
486 identified 21 locations with RVFV-positive vectors, including mosquitos from *Aedes*,  
487 *Culex*, *Anopheles*, and *Mansonia* spp. and from *Hyalomma* spp. ticks (Fig. 2). Notably,

488 in 6 out of 10 trapping surveys performed during interepidemic years in endemic zones,  
489 live RVFV or RVFV RNA was detected in captured vector mosquitoes or ticks [116-121].  
490 As the lifespan of mosquito vectors is relatively short, the presence of RVFV viral RNA  
491 in these vectors likely represents sustained circulation in each of the given locations.

492 **Human risk of RVFV-related disease.** Among our included studies from the  
493 systematic review, 84 reports assessed human risk factors for RVFV exposure. The  
494 factors most commonly assessed were occupation (33 papers), gender (30), age (89),  
495 contact with animals (38), travel (15), as well as proxies for mosquito exposure such as  
496 work or residence in proximity to water sources (12), and personal behaviors related to  
497 mosquito avoidance (29).

498 Quantitative assessment of the role of gender involved estimation of chances for  
499 RVFV exposure by men and women in endemic settings. There were 31 studies that  
500 reported RVFV exposure (cases or anti RVFV seropositivity) according to gender (Fig  
501 7). There was moderate heterogeneity among these studies ( $I^2 = 39\%$ ), and random  
502 effects modeling estimation yielded a summary pooled OR estimate of 1.41 ( $CI_{95\%}$  1.24,  
503 1.60,  $p < 0.001$ ) for males vs. females in their exposure rates (Fig 7). This value, based  
504 on studies from 1999-2021, remained very similar to that calculated by Nicholas and  
505 colleagues [64] (OR = 1.36) in their meta-analysis of studies from 1984-2011.

## Male:Female Odds Ratio for Human RVFV Infection

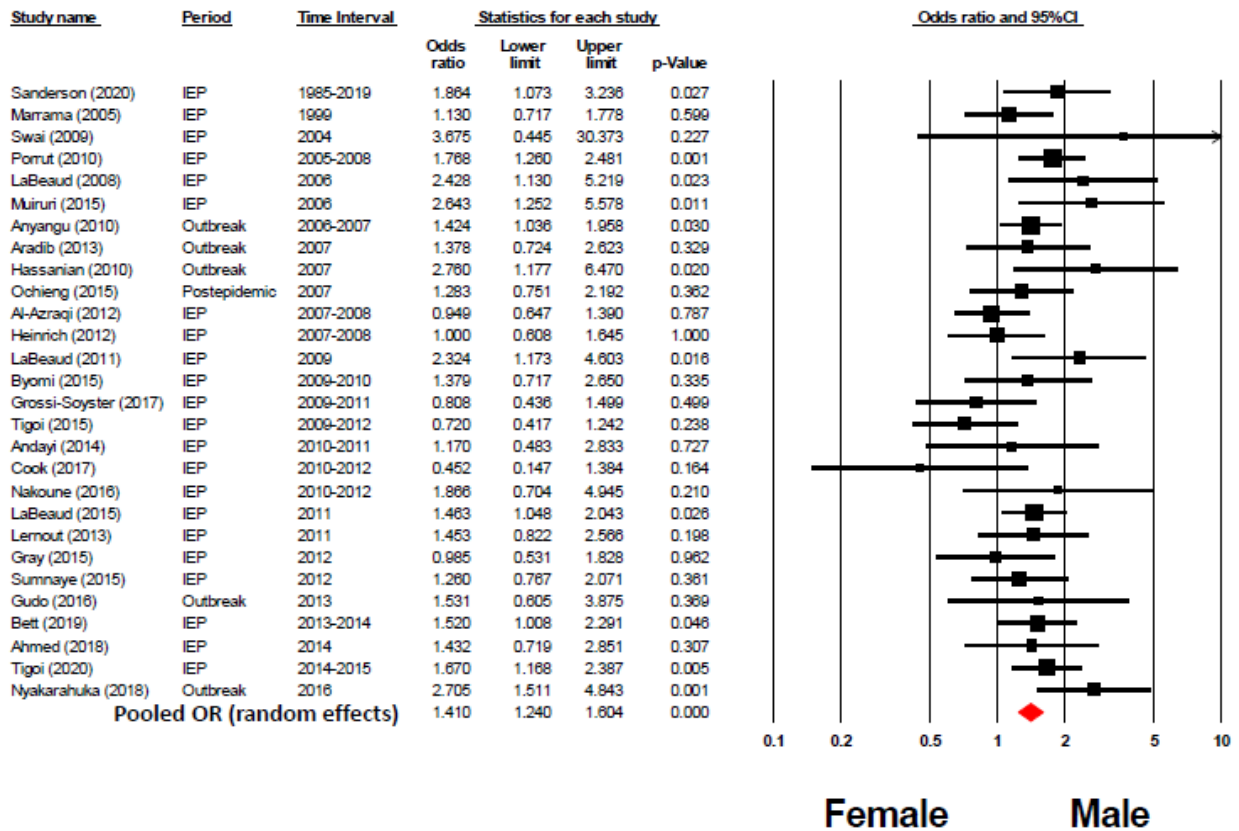

506

507 **Fig 7 Meta-analysis of the impact of human gender on odds of RVFV exposure in**  
 508 **at-risk populations**

509

510 **Greater human risk associated with animal contact.** Eleven well-structured  
 511 human surveys (having moderate to low risk of bias, i.e., LQAT scores  $\geq 6$ ) compared  
 512 rates of RVFV exposure among local residents according to the extent of their daily  
 513 contact with animals, particularly ruminant livestock. Heterogeneity was high among  
 514 these studies ( $I^2 = 68\%$ ). However, random effects meta-analysis, summarized in the  
 515 Forest plot in Fig 8, yielded a summary OR estimate signifying a 46% increase in the  
 516 odds of RVFV exposure among people with regular animal exposure (random effects  
 517 model pooled OR = 1.46,  $CI_{95\%} = 1.09, 1.94$ ,  $p = 0.01$ ) in at risk populations. In separate

518 task analyses, S1-S3 Figures show Forest plots for summary estimates of associations  
 519 between butchering, sheltering, and milking livestock activities and risk of RVFV  
 520 exposure among at-risk populations. The estimates were: for butchering, OR = 3.7  
 521 (CI<sub>95%</sub> = 2.5, 5.4, p < 0.001, I<sup>2</sup> = 75%); for sheltering, OR = 3.4 (CI<sub>95%</sub> = 2.1, 5.4, p <  
 522 0.001, I<sup>2</sup> = 57%); and for milking, OR = 5.0 (CI<sub>95%</sub> = 2.8, 8.8, p < 0.001, I<sup>2</sup> = 77%),  
 523 indicating significantly higher risk with these exposures. Among these pooled studies,  
 524 there was no evidence of publication bias (by funnel plot or by Eggar’s statistic). There  
 525 were no yearly trends in exposure effects, nor did sensitivity analysis indicate evidence  
 526 of any single dominant study for each exposure-related outcome.

## Odds Ratio of RVFV Infection When Exposed to Animals

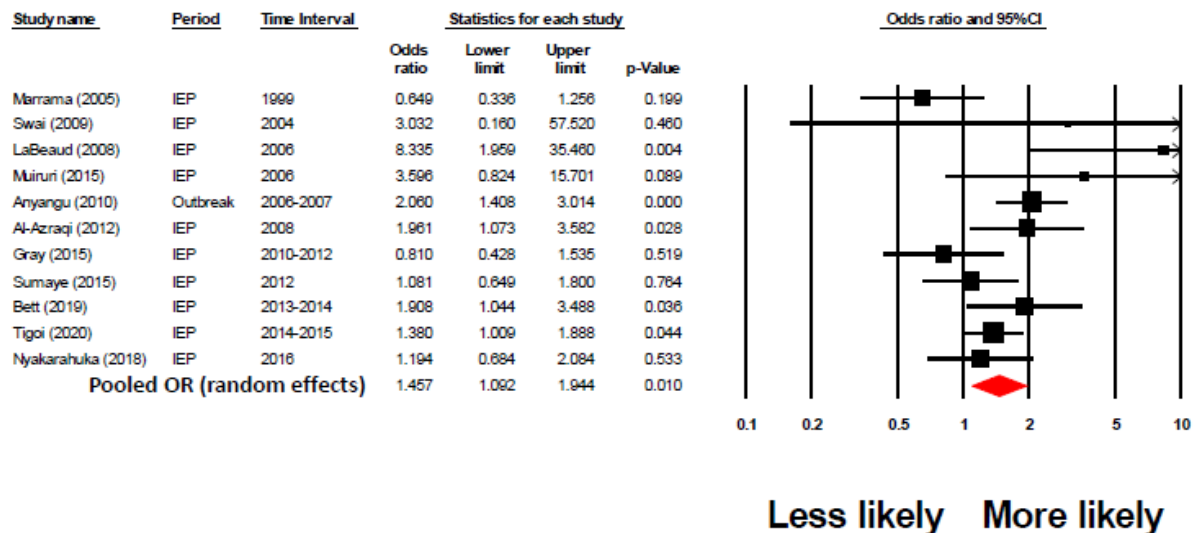

527

528 **Fig 8 Meta-analysis of the impact of animal exposure on odds of RVFV exposure**  
 529 **in at-risk populations.**

# Odds Ratio of RVFV Infection When Handling Abortus

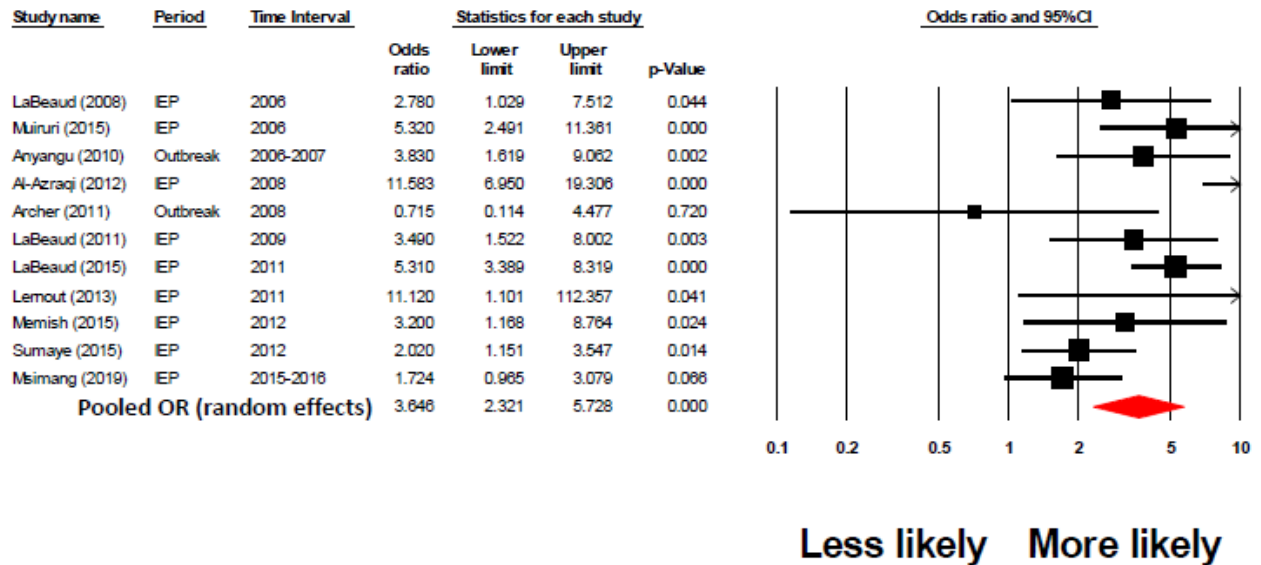

530

531 **Fig 9 Meta-analysis of the impact of handling RVF-related animal abortions on**  
 532 **odds of human RVFV exposure in at-risk populations**

533

534         Thirty-nine included studies assessed human RVFV-infection risk factors related

535 to different animal exposures and 17 of those studies linked animal exposures to acute

536 human RVFV infections (S8 Table). In meta-analyses performed according to specific

537 animal contact tasks, handling aborted material during an RVF outbreak had the

538 greatest pooled odds ratio of human infection (random effects model pooled OR = 3.65,

539  $CI_{95\%} = 2.32, 5.73, p < 0.001, I^2 = 73\%$ ).

540         Our survey also provided individual reports of an additional 21 significant animal

541 contact risk factors that had not been commonly assessed. In a study in Tanzania

542 during the 2006-2007 East Africa outbreak, 40% of 115 RVFV cases reported having

543 contact with animal products including meat and milk from sick animals, compared to

544 just 28% of the cases reporting having slaughtered an animal [122]. Specifically,

545 consumption of meat from sick animals was associated with a nearly four-fold increased  
546 risk of RVF-associated death during the 2006-7 outbreak in Kenya [68].

547 **Occupational and socioeconomic factors associated with RVFV exposure.**

548 Our systematic review identified seven studies overall that found statistically significant  
549 risks related to socioeconomic factors such as education level, ethnicity, and household  
550 size. Briefly, the less wealthy and less educated were overrepresented among RVFV  
551 exposed people (S9 Table).

552 Forty-five of the 506 papers assessed occupation as a human risk factor and 14  
553 references found occupation to be a statistically significant factor (S10 Table). For  
554 clarification, those who were classified as ‘herders’ may not necessarily live a pastoralist  
555 lifestyle, so they have been given separate status. We found three studies that reported  
556 high seroprevalence among “housewives”, which might be explained by their frequent  
557 handling of raw meat and animal products for cooking.

558 **Risk Factors for RVF severity.** Out of the 135 included papers assessing  
559 human RVFV exposure and disease, 12 presented data on human risk factors  
560 associated with more severe RVF disease presentation (S8 Table). Persons with animal  
561 contact were usually more likely to have had severe disease, [21, 123, 124]. In  
562 outbreaks in Kenya [123, 124], specific animal contact activities such as handling or  
563 consuming products from obviously sick animals (OR for more severe disease = 2.53,  
564  $CI_{95\%} = 1.78, 3.61$ , population attributable risk percentage [PAR%] = 19%) and touching  
565 an aborted animal fetus (OR = 3.83,  $95\% CI_{95\%} = 1.68, 9.07$ , PAR% = 14) were strongly  
566 linked to risk of severe rather than mild human RVF disease. Older age and death of a  
567 family member were also linked to more severe human disease [123]. In Sudan, males

568 aged 15-29 years were overrepresented among patients who presented with severe  
569 disease, as compared to females of the same age [125]. Environmental factors, such as  
570 excess rainfall and muddy soil linked to emergence of mosquito blooms have also been  
571 linked to severe human disease in both Sudan and Kenya [126, 127].

572         Severity of human RVF was associated with the presence of concomitant co-  
573 infections. A fatal outcome in a travel related case was attributed to the presence of  
574 concurrent hepatitis A virus infection [45]. Additionally, a study in South Africa during the  
575 2010 RVFV outbreak indicated that existing HIV-positive infection status was associated  
576 with risk of the encephalitic form of RVF disease [128], a finding similar to experience  
577 among HIV-infected patients in Tanzania in 2007, where all patients with HIV-positive  
578 status developed encephalitis, and of whom 75% died [122].

579         Four studies performed in three countries (Kenya, Sudan, Saudi Arabia),  
580 examined the risk factors linked to death from RVF. In Kenya in 2007, consuming and  
581 handling products from sick animals and village and district location were linked to risk  
582 of death (OR = 3.67, CI<sub>95%</sub> = 1.07, 12.64, PAR% = 47%) [124, 129]. In Saudi Arabia, a  
583 retrospective analysis of the 2000-2001 outbreak showed that specific clinical signs  
584 were independently linked to death. These included jaundice, bleeding, and neurologic  
585 symptoms ( $P < 0.0002$ ) [130]. One study demonstrated an increased level of RVFV  
586 replication in fatal RVFV [131].

587         **Risk factors for animal RVFV outbreaks.** Because human risk of RVFV  
588 exposure is closely associated with the local presence of infected livestock, we  
589 reviewed factors related to animals' risk of RVFV infection.

590           *Herd Immunity Levels.* Our systematic review included results from 174 animal  
591 studies, in which 144 tested domestic livestock and 26 tested wild animals for RVFV  
592 exposure and/or acute infection. Of all livestock studies included, 32 were conducted  
593 during an active epizootic, 10 were conducted just after an outbreak in the post-  
594 epidemic phase, and 97 were conducted during interepidemic years. For wildlife  
595 surveys, 5 were carried out during an active epizootic, 5 were done in the post-epidemic  
596 phase, and 14 were performed during interepidemic periods. Of all animal risk factors,  
597 sex and age were the most studied, and older animals and those that had lived through  
598 outbreaks were more likely to have been exposed. A summary of livestock risk factors is  
599 presented in S11 Table.

600           *Herd Level Risks.* For herd level risks, the observed effects of herd size has  
601 varied across studies. A 2013-2014 study in a high risk area of Kenya showed that  
602 medium sized herds of 50-100 animals had a significantly higher seroprevalence  
603 compared to small herds (< 50 animal) or very large herds (>100 animals) [132], though  
604 this did not account for the differences in animal rearing strategies dependent on herd  
605 size. The statistical significance of herd size was lost when village was accounted for as  
606 a random effect [74]. In Tunisia, the first assessment of serology in camels in 2017-  
607 2018 showed that camels living in smaller herds intended for meat production had a  
608 higher seroprevalence than those used for military purposes or tourism. Additionally,  
609 this study found that camels that had contact with ruminants had significantly higher  
610 rates of RVFV exposure [80].

611           The differing levels of RVFV susceptibility across livestock species (S11 table)  
612 further complicates the herd immunity threshold related to animal-to-human RVFV



613 spillover. Additionally, livestock had variable contact with other livestock from  
614 neighboring herds and regions. An extensive social contact analysis from the 2008-  
615 2009 Madagascar outbreak showed that bartering practices, in which cattle can have  
616 multiple contacts within a village, was a significant seroconversion risk factor [133].  
617 Such bartering practice can support for inter-village RVFV circulation, whereas formal  
618 trade networks or cross-border smuggling were more likely to be responsible for trans-  
619 national spread [134, 135].

620 *Individual Animal Risks.* For individual-level animal risk, studies examining cattle  
621 had the most significant findings. Abortion was the most recognized clinical sign  
622 associated with RVFV infection and recent abortion was significantly associated with  
623 RVFV exposure [136]. This experience was the first to identify the 2018 RVFV  
624 outbreaks in Kenya when farmer-reported surveillance was implemented [126]. None of  
625 the included studies found an association between underlying animal body condition  
626 and RVF risk.

627 **Wild animals' role in RVFV transmission.** RVFV has been found in a variety of  
628 wild mammals [48]. Wild ruminants, especially buffalo, have been found to have  
629 significant herd seroprevalence during inter-epidemic period in endemic areas [46, 137,  
630 138]. For species-specific risk factors, interspecific network centrality, home range and  
631 reproductive life-history traits were associated with RVFV occurrence. S12 Table  
632 summarizes the wild animal seropositivity and acute infections identified in our literature  
633 review.

634 **Animal Vaccination.** Among the included papers in this review, we identified 17  
635 studies in six countries that included vaccinated animals. Countries that had vaccinated

636 cattle, sheep, or goats for RVFV were Kenya, Tanzania, South Africa, Egypt, and Saudi  
637 Arabia [5, 139-143]. In Egypt, between 2013 and 2015, seroprevalence of anti-RVFV  
638 was 14.9% among immunized cattle, compared to 7.9% among unimmunized cattle  
639 [144]. Although livestock are required to be vaccinated before they are exported to  
640 Saudi Arabia, a study at a livestock quarantine facility in Djibouti found an anti-RVFV  
641 IgM-positive seroprevalence of 1.2% in sheep and goats (small ruminants grouped as  
642 'shoats') and 0.3% in cattle [139, 145]. A 2009 study in Mecca, Saudi Arabia found  
643 55.8% anti-RVFV IgG in ostensibly vaccinated sheep, but still found a 2.6% rate of IgM  
644 positivity, indicating possible ongoing circulation (despite herd vaccine status) or recent  
645 vaccination[146].

646 **Additional considerations for RVF risks.** The range of RVFV is expanding,  
647 and it appears to travel well [39, 147, 148]. In endemic countries, internal travel to or  
648 from outbreak epicenters is typically included in suspect case definitions. A recent  
649 review by Grossi-Soyster and LaBeaud [149] has highlighted the risk of RVFV  
650 transmission to travelers, and although most travelers will not have direct contact with  
651 livestock, their mosquito exposure behavior needs to be assessed.

652 **Reported surveillance methods** in animal, humans or vectors are summarized  
653 in S13 Table. Our review revealed 52 papers specifically reporting on RVFV  
654 surveillance. Their methods are not uniformly implemented, but include: i) leveraged  
655 RVFV testing of samples taken during surveillance for other diseases such as malaria,  
656 dengue, HIV, and Lassa fever [38, 150-152]; ii) the use of sentinel livestock herds in  
657 high-risk areas; iii) increased case surveillance based on monitoring of weather-related  
658 early warning signs; and iv) international collaborations with neighboring regions to

659 conduct surveillance. These surveillance systems do not necessarily operate in parallel,  
660 but instead may overlap and may only be implemented at times of perceived increased  
661 risk.

662 Fig 10 depicts the different types of early warning and surveillance systems and  
663 their relative certainty. S13 table further summarizes available information from open-  
664 source platforms on the early warning and surveillance systems used for RVFV  
665 transmission during 1999-2021.

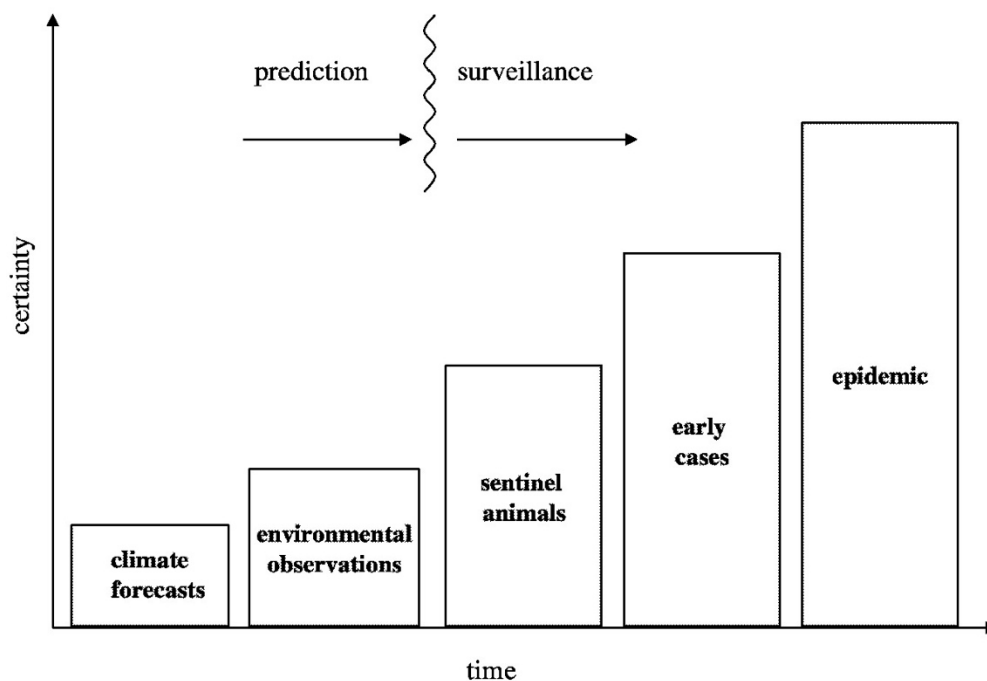

666  
667 **Fig 10 Progressive scale of surveillance that can be used to indicate an impending RVFV disease**  
668 **outbreak**

669 Republished with permission of The National Academies Press, from Under the Weather:  
670 Climate, Ecosystems, and Infectious Disease (2001), Chapter 7: Towards the Development of  
671 Disease Early Warning Systems. P. 87; permission conveyed through Copyright Clearance  
672 Center, Inc. under license ID #1142222

673  
674 **RVFV Diagnostics.** When implementing surveillance for detecting RVFV

675 transmission, one major constraint is the limited availability of accurate diagnostics in  
676 places where RVF disease occurs. For both human and animals, reliance on a clinical

677 presentation to prioritize RVFV testing is complicated by the significant clinical  
 678 diagnostic overlap with other febrile infection syndromes.

679 Although detection of circulating RVFV RNA by RT-PCR can be a definitive  
 680 diagnosis of active infection, because the human and livestock viremic period is typically  
 681 only 4-6 days (up to 14 days if hemorrhagic human disease), serologic testing is more  
 682 extensively used to investigate the epidemiology of recent and past infection. We  
 683 extracted data from 207 included review reports on the type of assays recently  
 684 employed for diagnosis of acute RVF. No studies tested livestock and wild animals  
 685 together for acute infection. The assays used to detect acute RVFV infections are  
 686 summarized in Table 3.

687

688 **Table 3: Summary of acute diagnostic assays employed in included studies, by**  
 689 **species**

| Number of Included Studies that Used the Following Methods for Detection of Acute RVFV Infection |     |                          |          |                               |                              |                          |                         |                          |          |                          |                          |       |
|--------------------------------------------------------------------------------------------------|-----|--------------------------|----------|-------------------------------|------------------------------|--------------------------|-------------------------|--------------------------|----------|--------------------------|--------------------------|-------|
| Species                                                                                          | IgM | IgM, direct <sup>1</sup> | IgM, PCR | IgM, PCR, direct <sup>1</sup> | IgM, PCR IgG SC <sup>2</sup> | IgM, IgG SC <sup>2</sup> | PCR IgG SC <sup>2</sup> | Direct <sup>1</sup> only | PCR only | PCR, direct <sup>1</sup> | IgG SC <sup>2</sup> only | Total |
| Livestock                                                                                        | 26  | 0                        | 4        | 0                             | 1                            | 3                        | 2                       | 0                        | 5        | 0                        | 3                        | 44    |
| Humans                                                                                           | 21  | 2                        | 23       | 4                             | 2                            | 0                        | 0                       | 2                        | 9        | 1                        | 0                        | 64    |
| Humans, livestock                                                                                | 1   | 1                        | 5        | 3                             | 1                            | 0                        | 0                       | 0                        | 1        | 0                        | 0                        | 12    |
| Humans, livestock, wildlife                                                                      | 0   | 0                        | 0        | 1                             | 0                            | 0                        | 0                       | 0                        | 0        | 0                        | 0                        | 2     |
| Wildlife                                                                                         | 0   | 0                        | 1        | 0                             | 0                            | 0                        | 0                       | 1                        | 0        | 1                        | 1                        | 4     |
| Method Total                                                                                     | 48  | 3                        | 33       | 8                             | 4                            | 3                        |                         | 3                        | 15       | 2                        | 4                        |       |

690 <sup>1</sup>Direct: Direct detection methods include immunofluorescence assay, cell culture (virus  
691 isolation), electron microscopy, and immunohistochemistry

692 <sup>2</sup>SC: IgG Seroconversion of IgG (positive IgG during the study period AND a previously  
693 documented negative status from the same individual)

694

695

696

## 697 **DISCUSSION**

698         During RVF epidemics, assessment of incidence, prevalence, and associated  
699 risk factors for infection are often based on case series of suspected patients, rather  
700 than well-designed, population-based surveys that enumerate laboratory-confirmed  
701 cases vs. non-cases. Epidemic and epizootic outbreak surveys are further hampered by  
702 limited access to the affected rural communities, which are often experiencing severe  
703 flooding caused by excessive rainfall, and very limited access to diagnostic testing. In  
704 addition, survey incidence/prevalence calculations may be imprecise because of lack of  
705 accurate census information. As a result of these factors and the irregular frequency of  
706 disease outbreaks, the epidemiology of RVFV transmission and the risk factors for  
707 RVFV-related human disease are not well defined. In some endemic areas, post-  
708 epidemic serosurveys have shown high community exposure to RVFV [68, 103, 151-  
709 156], even though symptomatic RVF had been only rarely reported by local health care  
710 services. Based on our consolidated picture of recent RVFV epidemiology and the  
711 knowledge gaps we have identified, future operational research and clinical trial design  
712 should consider the factors discussed below, with the understanding that currently  
713 available data have some significant limitations in accurately defining human risk for  
714 RVF.

715         Our review indicated that during the last two decades, new patterns of RVF  
716 epidemiology have emerged. The virus continues to expand its range across Africa

717 countries and into new regions within endemic countries [58, 157]. It should be noted  
718 that among studies that were technically excluded from our review, there were several  
719 completely negative serosurveys of animals performed in Spain [51], the Canary Islands  
720 [52], Mauritius [158], Zanzibar [159], South Korea [54], and Poland [53]. Expansion of  
721 RVFV transmission has been aided by livestock movement [34, 160-163] and the  
722 increasing frequency of extreme weather events involving heavy rainfall and flooding  
723 [59]. The discovery of vertical transmission within insect vector species other than  
724 floodwater *Aedes* spp. mosquitoes [164] indicates the existence of multiple pathways for  
725 local RVFV persistence in different ecosystems during time periods that are in between  
726 recognized outbreaks. An additional non-vector route of RVFV transmission to humans,  
727 i.e., maternal-fetal transmission, has also been identified recently [165-167], and it has  
728 been established that RVFV can be an abortifacient in humans [168]. Thus, treating  
729 RVF as a concern only during large scale outbreaks in known hotspots fails to capture  
730 the full burden of disease and its underlying transmission, and fails to detect new areas  
731 of emergence.

732         The limited understanding of transmission persistence during interepidemic  
733 periods is a major gap affecting our ability to control continued expansion of RVFV, both  
734 within and between countries. Prospective studies during interepidemic periods are  
735 needed to provide a deeper understanding of how RVFV survives then subsequently  
736 thrives in an endemic area. Study findings could then suggest how mitigation efforts,  
737 such as vaccination of high-risk humans, can be implemented even before existing  
738 surveillance systems detect an outbreak.

739           **Gap 1: Defining the likely interval between significant RVF outbreaks is**  
740 **challenging**, because without active case finding, passive detection is an imperfect  
741 trailing indicator of transmission, as it requires a large enough case number of RVF  
742 clinical syndromes (e.g., abortions in livestock) to identify events. Over the last two  
743 decades, increased availability and sensitivity of RVFV diagnostic assays, including  
744 genotyping, have contributed to increased recognition of viral transmission. However,  
745 without baseline interepidemic surveys in both high and low risk areas it is not possible  
746 to determine whether RVF outbreak waves are due to persistence or to re-introduction  
747 of RVFV transmission. As the outbreak intervals for RVFV remain undefined, the lack of  
748 studies during interepidemic periods limit our ability to understand viral maintenance  
749 and make it difficult to qualify endemicity in support of mitigation efforts such as  
750 vaccination. More useful data would include concomitant active surveillance of vectors,  
751 livestock, and humans, and information on rainfall, temperature, mosquito larval  
752 sources, and the frequency of risk-related human behaviors. Because RVF livestock  
753 outbreaks are up to five times more likely to occur where outbreaks have previously  
754 occurred, and human outbreaks are more likely to occur in the same locations as  
755 livestock outbreaks [5, 169], areas with prior RVFV transmission shown in Figs. 3 and 4  
756 would be best locations to characterize interepidemic transmission.

757           Kenya, South Africa, Madagascar, and Mauritania have had recurrent human  
758 and domestic animal RVF outbreaks in the last two decades and are thus most likely to  
759 experience additional outbreaks in the near future. Notably, areas with recurrent  
760 outbreaks tend to have more robust surveillance which may account for the higher  
761 frequency of RVF detection in those locations (i.e., ascertainment bias). Based on

762 findings identified in this systematic review, RVF can be more likely in a given location,  
763 compared to a similar nearby location due to many factors, including the total number of  
764 susceptible hosts (influenced by herd immunity), the presence of wildlife reservoirs  
765 [170], the water retention properties of the soil and rainfall patterns [62], local cultural  
766 practices that may increase (consumption of blood) or decrease risk (refusing to eat  
767 meat from dead animals) [171], and mitigation efforts that persist between outbreaks.  
768 As these factors can be confounded, an in-depth understanding of RVFV epidemiology  
769 is needed to design investigations so that resources for operational research can be  
770 maximized.

771 **Gap 2: The unpredictability of livestock herd immunity** Current prevention  
772 and readiness efforts for RVFV outbreaks rely mostly on early warning prediction and a  
773 rapid livestock vaccination response, both of which occur with variable reliability.  
774 Recovery from infection and vaccination with live-attenuated vaccines are thought to  
775 result in lifelong neutralizing antibodies in livestock [172] and indeed, if enough livestock  
776 could be vaccinated for RVFV, then human spillover would be unlikely [173]. However,  
777 livestock within and between herds have a rapid turnover rate as animals are  
778 slaughtered and sold, or arrive naïve into the herd from new births or purchases.  
779 Additionally, livestock in RVFV endemic countries often live in close proximity to wild  
780 ruminant species that also acquire many naïve animals each breeding season. The  
781 logistics and current intermittent nature of domestic livestock vaccination campaigns, in  
782 the face of unknown baseline herd immunity levels, makes full reliance on reactive  
783 livestock vaccination a risky approach to RVFV public health control.



784 Most livestock animal studies have focused on cattle, sheep, and goat  
785 seroprevalence. Although some surveys have used power analysis to determine how  
786 many animals to sample from each species, many surveys have still opted for  
787 convenience sampling, focusing either on sheep and goats, which are easier to handle,  
788 or on just cattle alone. The interpretation of such livestock prevalence surveys should  
789 be viewed with caution. Animal age is also likely to influence the results-- cattle and  
790 dairy animals tend to live longer than sheep or goats, so it can appear that their  
791 cumulative burden of exposure is higher. However, evidence of infection among  
792 younger animals does provide evidence for recent RVFV transmission activity, and  
793 increased seroprevalence between years can indicate an unrecognized outbreak. When  
794 multiple species are surveyed, rates should be calculated based on animal-years at risk  
795 and better attempts should be made to age animals based on their dentition. Factors  
796 that confound RVFV exposure risk should be captured, such as the wealth and  
797 knowledge of the farmer [113], area livestock density, and location-specific climate  
798 factors. We suggest factors such as nearby temporary and permanent water bodies,  
799 land use, mobility at peak mosquito biting times, housing conditions, and rearing  
800 strategy be combined with climate data to better discern spatial and temporal high-risk  
801 periods for livestock. This will be important in defining optimal locations for human  
802 vaccination trials.

803 As the previous systematic review by Clark, et al. [67] has highlighted, and as we  
804 found in our review, there are few studies that assess both human and animals from the  
805 same site at the same time. The high-risk periods for livestock and humans may not  
806 necessarily overlap, as livestock infections are undoubtedly driven by rainfall and

807 mosquito blooms, but human outbreaks can also expand with increased slaughtering of  
808 sick animals and the increased presence of secondary mosquito vectors.

809 It is understood that livestock viral amplification is an important predecessor of  
810 human outbreaks. The greater number of acute animal events (N=273), compared to  
811 human events (N=132) identified in this review could be due to our increasing ability to  
812 detect smaller animal outbreaks or could represent our inability to reliably detect acute  
813 human cases associated with smaller animal outbreaks [174, 175]. After animal  
814 outbreaks are established, we recommend broad-based human outbreak investigations  
815 that include all community members, not just the high-risk individuals, i.e., all individuals  
816 who may have had contact with animal products from the affected herd, as well as  
817 those who do not own livestock but reside in areas within vector flight range.

818 **Gap 3: Differences in seasonality across endemic/enzootic locations.** As  
819 climate change modifies seasonal weather patterns, differences in outbreak incidence  
820 are becoming more prominent among at-risk locations, but these changes may make  
821 epidemics harder to predict. Eighty-nine (31%) of our included studies specifically  
822 mention flooding at the outbreak site. A defined “rainy season” and “dry season” in  
823 tropical locations can guide risk assessment, but it is not just rain that makes an  
824 outbreak more likely. Congregation of many susceptible hosts and large volume  
825 slaughtering of animals (for example, as part of religious or community festivals [146,  
826 176, 177]), an abundance of mosquito breeding containers (for example, in plastic  
827 trash) [178], large-scale animal movement [179], and low baseline herd immunity will  
828 increase the chance of RVFV outbreaks. Recent data-driven modeling efforts by  
829 Hardcastle and colleagues [58], incorporating environmental and human and animal

830 census data at the district level, predict that outbreaks in southern and eastern Africa  
831 are most likely to occur in December through July, whereas risk in the Sahelian zone  
832 will be higher in September through November [180]. Even within countries, seasonal  
833 rainfall can vary widely. For example, in western Kenya, August typically has above  
834 average rainfall while the remainder of the country remains dry [181]. Real-time regional  
835 level weather information must be considered to obtain adaptive implementation of  
836 mitigation efforts.

837 Pastoralist herds tend to have higher RVFV exposure, and this is influenced by  
838 the types of ecozones where the herds circulate. Pastoralists follow water and pasture  
839 availability as they become available in a seasonal cycle, which may involve movement  
840 through high-risk zones. As animal protein demand increases, mostly in urban centers,  
841 more livestock will be passing through areas that have previously experienced RVF  
842 cases, and in the presence of competent mosquito vectors. Recent infections are more  
843 common in nomadic herds compared to agro-pastoralist herds [182] and in herds with  
844 longer distance to travel to their night pens or to the nearest permanent water [82].  
845 Modeling of data from Senegal suggested that nomadic herd movements are sufficient  
846 to account for endemic circulation of RVFV, although the co-existence of *Aedes vertical*  
847 transmission cannot be ruled out [183].

848 In addition to climate, the variety of suitable hosts present in those areas will also  
849 vary from location to location. All potential wildlife reservoir species should be  
850 considered when comparing incidences between two geographically distinct areas  
851 because wild animals' behaviors and range is intimately tied to topography and  
852 resource availability. In Botswana, wildlife hunters' seroprevalence was 27% compared

853 to a 3% community level exposure [35], showing that wildlife exposure may contribute  
854 directly to human burden independent of domestic livestock presence. This is further  
855 illustrated by human case exposure in Angola without documented livestock exposure  
856 [100]. As RVFV can adapt to new ecological niches and utilize a wide variety of  
857 mammals to amplify itself, including common white-tail deer [184, 185], we caution not  
858 to make the assumption that wild animals' role in RVFV transmission will be similar  
859 between locations. All suitable wild animals, particularly wild ungulates, should in  
860 included in calculations of regional herd immunity and their interface with humans  
861 should be considered as a likely risk factor.

862 **Gap 4: Data challenges related to bias based on limited study designs and**  
863 **inconsistent reporting.** A systematic review by Bron and colleagues [186] has  
864 summarized the patchwork of data collected on RVFV epidemiology over the last  
865 century, and has highlighted the lack of standardized reporting as the major challenge in  
866 comparing data between locations. In our current systematic review, which focused  
867 solely on studies from the last two decades, we confirm that uneven reporting remains a  
868 significant problem. Improving study designs and sampling frameworks for RVFV is  
869 challenging, in part due to the lack of funding opportunities during interepidemic periods.  
870 In outbreak reports, uncertain levels of ascertainment bias and possible diagnostic  
871 misclassification, mean that case finding and resulting case counts have unclear  
872 accuracy. 'Population at risk' numbers used in incidence and prevalence calculations  
873 are often chosen based on outdated census data without true understanding of who is  
874 at risk within a community. With many smaller, low-budget, short-term studies (rather  
875 than large collaborative long-term efforts) the focus turns to identifying enough cases for

876 a meaningful statistical analysis, which means that some studies will test only high-risk  
877 individuals working with animals. This likely excludes vulnerable populations who have  
878 not yet been identified as being at high-risk.

879 Hospital-based surveys for hemorrhagic fever surveillance are an attractive tool  
880 because they do not require household field visits and blood samples are typically more  
881 available for testing [38, 40, 150-152, 187, 188]. Such sero-surveillance can be  
882 compared from year to year to gain retrospective insight on when transmission has  
883 occurred. However, as with most hospital-based studies, these efforts do not represent  
884 the population at large, so they likely underestimate true incidence and overestimate the  
885 percentage of cases with severe disease.

886 **Gap 5: Delineating human risk factors.** This meta-analysis of human risk  
887 factors across multiple 1999-2021 studies confirm the increased RVFV infection risk  
888 associated with male gender, general livestock care, contact with animal abortus,  
889 butchering animals, and milking risks, identified in previous reviews and meta-analysis  
890 [64, 189]. Not all of the studies in this systematic review were population-based, thus  
891 the variable reporting of associations having ‘statistical significance’ may be attributed to  
892 differences in study design, low sample size with lack of statistical power, and/or choice  
893 of target populations.

894 In most places where RVFV outbreaks occur, lack of health care infrastructure  
895 impedes detailed description of human disease signs and performance of laboratory  
896 studies (including assessment of viral load and immunologic responses to infection),  
897 which might be predictive of severe disease or death. It is possible that other health  
898 comorbidities, such as concurrent HIV or hepatitis, can influence the presentation of

899 RVFV disease, but these associations have not yet been widely studied. Further  
900 descriptions of the natural history of clinical and laboratory findings in human RVF are  
901 needed, and efforts should be made to fully assess the relative risks from direct (non-  
902 vector) animal exposures vs. mosquito vector-borne exposure. Frontline healthcare  
903 workers need to recognize when testing for RVFV infection is appropriate, based on  
904 patients' significant risk factors, and they should communicate frequently with local  
905 veterinary colleagues to identify high-risk transmission periods.

906         Most risk factor analyses rely on participant recall, risking recall bias, and it has  
907 been difficult to discriminate the risk of living in the presence of susceptible livestock  
908 from risk due to direct participation in husbandry activities or from risk due to local  
909 mosquito exposure (including variably zoophilic and anthropophilic mosquito species).  
910 Aside from animal rearing activities, the association of human risk with consumption of  
911 infected animal products is concerning, as this is practiced by a majority of human  
912 populations and the true infectivity by consumption is still not well understood. For  
913 example, consumption of raw milk is a now well recognized as an RVFV exposure risk  
914 factor [64, 189], but no previous studies have isolated RVFV from milk during outbreaks.  
915 Ongoing studies in Kenya (Gerken et al, unpublished), are conducting risk assessments  
916 in urban areas to distinguish consumption risk factors versus risk from livestock rearing  
917 activities common to rural areas.

918         RVF has been perceived as a disease of poverty, but this is likely due to its  
919 greater incidence recognized in rural areas. It is not known whether RVFV has an urban  
920 transmission cycle, and so far, the risk of RVF related to socioeconomic status (aside  
921 from having a pastoralist lifestyle) is poorly defined. Choice of occupation is intimately

922 connected to socioeconomic status and this systematic review confirmed that the  
923 highest-risk occupations are associated with livestock exposure. Even within  
924 occupational categories, differences in assigned tasks can carry differential risks [190].  
925 We combined common terminology for the same profession, for example,  
926 slaughterhouse and abattoir workers for our analysis; however, more specific factors  
927 such as size of the slaughterhouse, species slaughtered, and available personal  
928 protective equipment (PPE) are likely strong confounding factors.

929

930 **Gap 6: Need for consistent naming of RVFV lineages and strains.** A possible  
931 explanation for variation in RVF attack rates and disease severity, noted between  
932 locations and among different hosts, could be differences in RVFV strain virulence.  
933 Laboratory studies suggest some strain-specific differences in mortality in experimental  
934 animals [191]. However, the variability observed during natural outbreaks is likely due to  
935 site-related diagnostic misclassification of RVFV infection with erratic failure to detect  
936 milder cases of disease. Our systematic review aimed to capture strain- and lineage-  
937 specific effects; however, a meaningful analysis was obscured by inconsistent naming  
938 of lineages due to differences in the genetic sequences chosen to be studied and  
939 different approaches to sequence homology analysis. International harmonization of  
940 lineage identity and nomenclature will help to determine differential effects, if any, of  
941 individual RVFV lineages and strains. As with SARS-CoV2 variants, a naming scheme  
942 that does not rely on location may help to alleviate some of the disincentive and stigma  
943 for national governments to report acute cases and identify sequences of circulating  
944 genomes to identify sources of local introduction.

945           **Gap 7: Need for consistent RVFV testing frameworks.** As highlighted earlier,  
946 identification of RVFV outbreaks and determination of the endemic state of a country  
947 require consideration of the efficacy of surveillance efforts in place. Well organized and  
948 implemented surveillance systems provide the basis for understanding the epidemiology  
949 of RVFV and provide an opportunity to provide early warning and an opportunity to fill  
950 the gaps in current knowledge.

951           As RVFV diagnostics become more widely available, physicians in  
952 hyperendemic regions will be able to consider co-infection with RVFV in their differential  
953 diagnoses, especially for pregnant mothers who are at risk for abortion [168].  
954 Additionally, if hospitals are aware of current RVFV circulation in livestock, they can go  
955 on high-alert and intensify their screening of patients for RVF. However, the lack of  
956 specific medical therapeutics may dissuade clinicians from testing for RVFV and favor  
957 testing for more treatable conditions, notably malaria. As the recent experience with  
958 Ebola virus in West Africa has taught, compassionate care must be the cornerstone of  
959 outbreak response in order for the at-risk population to buy into control measures.  
960 Public health messaging that fuels despair results in massive underreporting,  
961 particularly if outbreaks become political [192].

962           There are concerted efforts to create a pan-viral hemorrhagic fever diagnostic  
963 assay. The Uganda Virus Research Institute (UVRI) in Entebbe has been implementing  
964 laboratory-based surveillance for viral hemorrhagic fevers (VHF) in Uganda since 2010,  
965 which includes testing for RVFV [193]. While this may help differentiate RVFV from  
966 other concerning viruses, we caution about the grouping of RVFV with other  
967 hemorrhagic fevers for surveillance purposes, as RVF-related hemorrhage in humans is



968 the rarest clinical manifestation, and the risk factors for other forms of RVFV-related  
969 disease are different.

970         Development of robust RVFV surveillance systems is complex, because both  
971 animals and humans display variably detectable disease outcomes when they become  
972 infected. Currently, most RVFV surveillance systems are engaged only in response to  
973 climate early warning systems and are focused on periods with high-risk for large scale  
974 outbreaks. We found that recent re-structuring of the FAO Global Animal Disease  
975 Information System (EMPRESi) has provided an open-source, easy to navigate platform  
976 for tracking reports of RVFV cases in member countries. Since 2004, the system has  
977 recorded 1,186 animal cases of RVFV, of which 1,175 were confirmed. This reporting  
978 system relies on mandatory reporting of acute cases by national authorities, the OIE,  
979 WHO, FAO field officers, and published reports such as those included in this review.  
980 However, this database excludes longitudinal seroconversions, and therefore, excludes  
981 evidence of sub-clinical transmission during interepidemic periods. Modeling  
982 approaches using only these data should consider this key missing piece in their  
983 assumptions. Although RVFV is a reportable disease in many of the affected countries,  
984 a system that relies on passive reporting is likely to miss areas of new emergence when  
985 viral activity is below the threshold to detect excess numbers of patients with the more  
986 obvious clinical signs of RVF. It should be noted that the partnership of a strong national  
987 veterinary service with close ties to a fully equipped national laboratory is crucial to any  
988 successful surveillance effort. If farmer-based cellphone reporting is to be successful at  
989 identifying RVF cases, farmers need to be sensitized to the greater goals of the system  
990 and incentivized to report. Overall, the ideal surveillance system for RVFV would utilize

991 aspects of each of the discussed surveillance types (Fig 10), focusing on sentinels and  
992 enhanced active case finding, including during interepidemic periods, and take into  
993 account regional differences in animal and human health systems. Since RVFV is a  
994 vector-transmitted disease, and a large proportion of the world has the potential for  
995 RVFV emergence, the management of RVFV surveillance efforts should be regionally  
996 collaborated and all RVFV-naive countries with large numbers of livestock should take  
997 into account past lessons about recent new geographic introduction as they prepare  
998 prevention and mitigation efforts for themselves [194-199].

999         Post-epidemic performance analyses have found that the lead time given by  
1000 early warning systems may not be sufficiently long to prepare and vaccinate enough  
1001 livestock to contain an outbreak. Just as reliance on a passive surveillance system for  
1002 RVFV is likely to not be enough to detect outbreaks, sole reliance on a remotely sensed  
1003 early warning systems (EWS) should also be avoided. One major limitation of climatic  
1004 EWS is that they do not account for the effect of herd immunity, either through natural  
1005 infection or prior livestock vaccination. Livestock seroprevalence as high as 60% have  
1006 been captured in high risk areas [200] and up to 38% in areas that are not typically  
1007 classified as high risk, such as Chad [201]. The lack of outbreak detection, despite  
1008 seemingly high-risk weather conditions, can be explained both by the effect of herd  
1009 immunity and limitations of existing surveillance systems. With this current level of  
1010 performance, at-risk countries should not rely solely on early warning systems and  
1011 instead use them as part of integrated decision support tools, similar to those developed  
1012 for the greater Horn of Africa [202]. As RVFV outbreaks have often had an insidious

1013 onset, we recommend active case finding in high-risk areas in response to any of the  
1014 previously mentioned early warning signals.

1015 **Gap 8: Evolving better approaches to diagnostics.** Because arboviral  
1016 infections such as RVF often result in self-limited febrile syndromes with non-specific  
1017 signs and symptoms, isolated cases of infection are frequently misdiagnosed as malaria  
1018 in sub-Saharan Africa. This highlights the critical need for affordable and accurate point-  
1019 of-care diagnostics for RVFV [203-206]. In the majority of recent transmission surveys,  
1020 anti-RVFV IgM serology was used alone to define recent infection, and more humans  
1021 than animals were found to be positive. As commercial IgM ELISA tests are now more  
1022 widely available for livestock, this gap likely represents a lack of available resources,  
1023 either financial or logistical, for testing livestock for recent infection. For suspect acute  
1024 cases, IgM allows a wider window of detection than discovery of circulating virus or viral  
1025 RNA [207].

1026 Among the 95 studies that reported human serology, the methods for human  
1027 anti-RVFV antibody detection exhibited significant variability, with most studies relying  
1028 on tertiary reference laboratories for final diagnosis. Future efforts should focus on  
1029 increasing the number and capacity of local laboratories so that the burden of shipping  
1030 time and costs can be alleviated. The Covid-19 pandemic response has led to  
1031 expansion of molecular diagnostic capacity in many regions. In the aftermath of the  
1032 pandemic, these important logistical and laboratory resources should be leveraged to  
1033 include other viral diseases such as RVF.

1034 Serology serves as the basic approach for investigating individual and  
1035 community level risk factors as it can monitor changes in prevalence over time. Both

1036 enzyme-linked immunosorbent assays (ELISA) and viral neutralization tests (VNT) have  
1037 advantages and disadvantages. Identifying IgG-positive livestock by ELISA has often  
1038 been the first step in recognizing new areas of emergence [80, 208]. However, follow up  
1039 VNT should be used to confirm positive ELISA results in new locations, especially if the  
1040 seroprevalence is low (less than 1-2%) when misclassification due to false-positive tests  
1041 is of concern.

1042 **Gap 9: The need for One Health approaches for RVFV detection and**  
1043 **control.** Expanding RVFV surveys to include human community populations at-large  
1044 will identify risk associated with socioeconomic standing, while simultaneously detecting  
1045 patients with incident infections but without presently known risk factors. To fully  
1046 understand the ecology of local transmission such broad-based human studies need to  
1047 be conducted concurrently with robust animal surveys. Recent reviews and policy  
1048 papers in the human and animal health RVFV literature call for a greater emphasis on a  
1049 One Health management approach, both in research and control efforts [127, 209, 210].  
1050 A better understanding of viral transmission to all species during interepidemic periods,  
1051 with an improvement of diagnostic sampling frameworks, are within reach in the next  
1052 decade. Reaching an understanding of the herd immunity threshold for outbreak  
1053 initiation, the variability in case fatality risks, the contributions of vectors to both  
1054 asymptomatic and symptomatic human and animal infections, and the most influential  
1055 transmission pathways will take a collaborative effort among multiple disciplines and  
1056 public health sectors. The gaps presented here are based on a collated estimates of  
1057 recent RVFV transmission. The available case counts and serosurveys in this

1058 systematic review contribute to a body of evidence that can guide the way forward to  
1059 clinical testing of novel preventive and curative interventions.

1060 **Summary.** RVFV continues to transmit across Africa and nearby Indian Ocean  
1061 islands at a high rate, but at an irregular frequency. As previously noted, because of its  
1062 typical mosquito-borne re-emergent transmission, RVFV outbreaks often follow periods  
1063 of excess rainfall and local flooding, particularly in semi-arid regions. During the 1999-  
1064 2021 period studied in this review, animal and human outbreaks of RVF occurred at an  
1065 average rate of 5-6 events per year across the region. The range of transmission has  
1066 expanded, with human cases documented for the first time in Saudi Arabia, Yemen,  
1067 Comoros, Mayotte, Burundi, Niger, and Mali, and with re-emergence in Uganda after  
1068 multiple decades of no activity. Reported human RVF events were most common in  
1069 Mauritania, Kenya, Sudan, Madagascar, and South Africa, and each of these countries  
1070 experienced multiple epidemics since 1999. In districts or counties where human cases  
1071 were reported, the median attack rate was 2.6 per 100,000 (range 0.1 to 91), and  
1072 median case fatality was 14.1% of severe cases, highlighting the significant population  
1073 health burden of RVF.

1074 Experience with veterinary vaccines indicates that pre-event vaccination can  
1075 mitigate the spread of RVFV infection. Now that human vaccines are under  
1076 development, and their clinical testing and implementation should be guided by  
1077 particular focus on the high-risk subgroups (based on location and exposures) identified  
1078 in this review. Effective vaccine trials will depend on achieving accurate outbreak  
1079 predictions combined with efficient animal and human case surveillance systems.

1080

## 1081 **Acknowledgments**

1082 The authors would like to acknowledge the very helpful guidance provided by members  
1083 of the CEPI literature review advisory group: Dr. Brian Bird, Dr. Baptiste Dungu, Roice  
1084 Fulton, Dr. Jeroen Kortekaas, Dr. Paul Oloo, Dr. Janusz Paweska, Dr. Melinda Rostal,  
1085 and Dr. George Warimwe.

1086 We also acknowledge the assistance of RVFV research collaborators who provided  
1087 their unpublished survey data for inclusion in this study: Garja S. Suner, Pius S. Ekong,  
1088 Elysse N. Grossi-Soyster, Mabel K. Aworh, Yiltawe S. Wungak, Nanven A. Maurice,  
1089 Michael J. Ekong, and Bonto Faburay.

1090

## 1091 **Figure legends**

1092 **Fig 1. PRISMA systematic review flow diagram of data collection and evaluation**  
1093 Online searches for publications and data registers (left side flow) were supplemented  
1094 by governmental outbreak reports, non-indexed citations found in local archives, and  
1095 citations found within the reference lists of the papers that were reviewed (right side  
1096 flow). Data from one unpublished study were also included for evaluation.

1097

1098 **Fig 2. Regional map of countries exposed to RVFV infection based on findings of**  
1099 **studies included in the systematic review.** Countries were categorized as to whether  
1100 there was evidence of human, animal, or insect RVFV infection during the 1999-2021  
1101 era.

1102

1103 **Fig 3. Sub-national administrative regions experiencing acute human cases of**  
1104 **RVF during the years 1999-2021** Locations are shaded according to whether they  
1105 experienced outbreaks before or after 2011, or if they had outbreaks during both  
1106 periods of time.

1107

1108 **Fig 4. Sub-national administrative regions experiencing acute animal cases of**  
1109 **RVF during the years 1999-2021** Locations are shaded according to whether they  
1110 experienced outbreaks before or after 2011, or during both periods of time.

1111

1112 **Fig 5. Acute human RVF events per year during 1999-2021, by geographic regions**  
1113 **across Africa, the Indian Ocean, and the Arabian Peninsula**

1114

1115 **Fig 6. Acute animal RVF events per year during 1999-2021, by geographic regions**  
1116 **across Africa, the Indian Ocean, and the Arabian Peninsula**

1117  
1118 **Fig 7 Meta-analysis of the impact of human gender on odds of RVFV exposure in**  
1119 **at-risk populations**

1120  
1121 **Fig 8 Meta-analysis of the impact of animal exposure on odds of RVFV exposure**  
1122 **in at-risk populations.**

1123  
1124 **Fig 9 Meta-analysis of the impact of handling RVF-related animal abortions on**  
1125 **odds of human RVFV exposure in at-risk populations**

1126  
1127 **Fig 10 Progressive scale of surveillance that can used to indicate an impending**  
1128 **RVFV disease outbreak.** Republished with permission of The National Academies  
1129 Press, from Under the Weather: Climate, Ecosystems, and Infectious Disease (2001),  
1130 Chapter 7: Towards the Development of Disease Early Warning Systems. P. 87;  
1131 permission conveyed through Copyright Clearance Center, Inc. under license ID  
1132 #1142222

1133

1134

1135 **References**

- 1136 1. Gubler DJ. The global emergence/resurgence of arboviral diseases as public health  
1137 problems. Arch Med Res. 2002;33(4):330-342. Epub 2002/09/18. doi: 10.1016/s0188-  
1138 4409(02)00378-8.
- 1139  
1140 2. CDC. Rift Valley Fever. Viral Hemorrhagic Fevers: Fact Sheets. 2021:1-3. Available  
1141 from <https://www.cdc.gov/vhf/index.html>
- 1142  
1143 3. Isaäcson M. Viral hemorrhagic fever hazards for travelers in Africa. Clin Infect Dis.  
1144 2001;33(10):1707-1712. Epub 2001/10/12. doi: 10.1086/322620.
- 1145  
1146 4. WHO. Rift Valley Fever. WHO Fact Sheet No 207. 2018:1-5. Epub 19 Feb 2018.
- 1147  
1148 5. Munyua P, Murithi RM, Wainwright S, Githinji J, Hightower A, Mutonga D, et al. Rift  
1149 Valley fever outbreak in livestock in Kenya, 2006-2007. Am J Trop Med Hyg. 2010;83(2  
1150 Suppl):58-64. Epub 2010/08/13. doi: 10.4269/ajtmh.2010.09-0292.
- 1151  
1152 6. CDC. Outbreak of Rift Valley fever--Yemen, August-October 2000. MMWR.  
1153 2000;49(47):1065-1066.
- 1154  
1155 7. Woods CW, Karpati AM, Grein T, McCarthy N, Gaturuku P, Muchiri E, et al. An  
1156 outbreak of Rift Valley fever in Northeastern Kenya, 1997-98. Emerg Infect Dis.  
1157 2002;8(2):138-144. Epub 2002/03/19. doi: 10.3201/eid0802.010023.
- 1158  
1159 8. Daubney R, Hudson JR, Garnham PC. Enzootic hepatitis or Rift Valley fever: an  
1160 undescribed virus disease of sheep, cattle and man from East Africa. Journal of  
1161 Pathology and Bacteriology. 1931;34:545-579.
- 1162  
1163 9. CDC. Update: Outbreak of Rift Valley Fever - Saudi Arabia, August-November 2000.  
1164 MMWR. 2000;49(43):982-985.
- 1165  
1166 10. Golnar AJ, Turell MJ, LaBeaud AD, Kading RC, Hamer GL. Predicting the mosquito  
1167 species and vertebrate species involved in the theoretical transmission of Rift Valley  
1168 fever virus in the United States. PLoS Negl Trop Dis. 2014;8(9):e3163. doi:  
1169 10.1371/journal.pntd.0003163.

1170



- 1171 11. Iranpour M, Turell MJ, Lindsay LR. Potential for Canadian mosquitoes to transmit  
1172 Rift Valley fever virus. J Am Mosq Control Assoc. 2011;27(4):363-369. Epub  
1173 2012/02/15. doi: 10.2987/11-6169.1.
- 1174  
1175 12. Turell MJ, Dohm DJ, Geden CJ, Hogsette JA, Linthicum KJ. Potential for stable flies  
1176 and house flies (Diptera: Muscidae) to transmit Rift Valley fever virus. J Am Mosq  
1177 Control Assoc. 2010;26(4):445-448. Epub 2011/02/05. doi: 10.2987/10-6070.1.
- 1178  
1179 13. Turell MJ, Wilson WC, Bennett KE. Potential for North American mosquitoes  
1180 (Diptera: Culicidae) to transmit Rift Valley fever virus. J Med Entomol. 2010;47(5):884-  
1181 889. Epub 2010/10/14. doi: 10.1603/me10007.
- 1182  
1183 14. Gargan TP, 2nd, Clark GG, Dohm DJ, Turell MJ, Bailey CL. Vector potential of  
1184 selected North American mosquito species for Rift Valley fever virus. Am J Trop Med  
1185 Hyg. 1988;38(2):440-446. doi: 10.4269/ajtmh.1988.38.440.
- 1186  
1187 15. Turell MJ, Bailey CL, Beaman JR. Vector competence of a Houston, Texas strain of  
1188 *Aedes albopictus* for Rift Valley fever virus. J Am Mosq Control Assoc. 1988;4(1):94-96.
- 1189  
1190 16. Chengula AA, Mdegela RH, Kasanga CJ. Socio-economic impact of Rift Valley  
1191 fever to pastoralists and agro pastoralists in Arusha, Manyara and Morogoro regions in  
1192 Tanzania. Springerplus. 2013;2:549. Epub 2013/11/21. doi: 10.1186/2193-1801-2-549.
- 1193  
1194 17. Holleman C. The socio-economic implications of the livestock ban in Somaliland.  
1195 Food Early Warning System, Assessment Mission to Somaliland. FEWS NET, Nairobi  
1196 2002.
- 1197  
1198 18. Muga GO, Onyango-Ouma W, Sang R, Affognon H. Sociocultural and economic  
1199 dimensions of Rift Valley fever. Am J Trop Med Hyg. 2015;92(4):730-738. Epub  
1200 2015/02/18. doi: 10.4269/ajtmh.14-0363.
- 1201  
1202 19. Rich KM, Wanyoike F. An assessment of the regional and national socio-economic  
1203 impacts of the 2007 Rift Valley fever outbreak in Kenya. Am J Trop Med Hyg. 2010;83(2  
1204 Suppl):52-57. doi: 10.4269/ajtmh.2010.09-0291.
- 1205  
1206 20. Riou O, Phillippe B, Jouan A, Coulibaly I, Mondo M, Digoutte JP. Les formes  
1207 neurologiques et neurosensorielles de la fièvre de Valley du Rift en Mauritanie. Bulletin  
1208 de la Societe de Phologie Exotiques. 1989;82:605-610.
- 1209

- 1210 21. Kahlon SS, Peters CJ, Leduc J, Muchiri EM, Muiruri S, Njenga MK, et al. Severe  
1211 Rift Valley fever may present with a characteristic clinical syndrome. *Am J Trop Med*  
1212 *Hyg.* 2010;82(3):371-375. doi: 10.4269/ajtmh.2010.09-0669.
- 1213  
1214 22. Kim Y, Metras R, Dommergues L, Youssouffi C, Combo S, Le Godais G, et al. The  
1215 role of livestock movements in the spread of Rift Valley fever virus in animals and  
1216 humans in Mayotte, 2018-19. *PLoS Negl Trop Dis.* 2021;15(3):e0009202. doi:  
1217 10.1371/journal.pntd.0009202.
- 1218  
1219 23. OIE. Rift Valley Fever (RVF): OIE; 2021. Available from:  
1220 <https://www.oie.int/en/animal-health-in-the-world/animal-diseases/rift-valley-fever/>.
- 1221  
1222 24. Davies FG, Linthicum KJ, James AD. Rainfall and epizootic Rift Valley Fever. *Bull*  
1223 *World Health Organ.* 1985;63:941-943.
- 1224  
1225 25. Linthicum KJ, Anyamba A, Tucker CJ, Kelley PW, Myers MF, Peters CJ. Climate  
1226 and satellite indicators to forecast Rift Valley fever epidemics in Kenya. *Science.*  
1227 1999;285:397-400.
- 1228  
1229 26. Linthicum KJ, Bailey CL, Davies FG, Tucker CJ. Detection of Rift Valley fever viral  
1230 activity in Kenya by satellite remote sensing imagery. *Science.* 1987;235(4796):1656-  
1231 1659. Epub 1987/03/27.
- 1232  
1233 27. Linthicum KJ, Bailey CL, Tucker CJ, Mitchell KD, Logan TM, Davies FG, et al.  
1234 Application of polar-orbiting, meteorological satellite data to detect flooding of Rift Valley  
1235 fever virus vector mosquito habitats in Kenya. *Med Vet Entomol.* 1990;4(4):433-438.  
1236 Epub 1990/10/01.
- 1237  
1238 28. Anyamba A, Chretien JP, Formenty PB, Small J, Tucker CJ, Malone JL, et al. Rift  
1239 Valley fever potential, Arabian Peninsula. *Emerg Infect Dis.* 2006;12(3):518-520. Epub  
1240 2006/05/23. doi: 10.3201/eid1203.050973.
- 1241  
1242 29. Anyamba A, Chretien JP, Small J, Tucker CJ, Formenty PB, Richardson JH, et al.  
1243 Prediction of a Rift Valley fever outbreak. *Proc Natl Acad Sci U S A.* 2009;106(3):955-  
1244 959. doi: 10.1073/pnas.0806490106.
- 1245  
1246 30. Anyamba A, Chretien JP, Small J, Tucker CJ, Linthicum KJ. Developing global  
1247 climate anomalies suggest potential disease risks for 2006-2007. *Int J Health Geogr.*  
1248 2006;5:60. Epub 2006/12/30. doi: 10.1186/1476-072x-5-60.

- 1249  
1250 31. Anyamba A, Linthicum KJ, Small J, Britch SC, Pak E, de La Rocque S, et al.  
1251 Prediction, assessment of the Rift Valley fever activity in East and southern Africa 2006-  
1252 2008 and possible vector control strategies. *Am J Trop Med Hyg.* 2010;83(2 Suppl):43-  
1253 51. doi: 10.4269/ajtmh.2010.09-0289.
- 1254  
1255 32. Anyamba A, Linthicum KJ, Tucker CJ. Climate-disease connections: Rift Valley  
1256 fever in Kenya. *Cad Saude Publica.* 2001;17 Suppl:133-140. Epub 2001/06/27. doi:  
1257 10.1590/s0102-311x2001000700022.
- 1258  
1259 33. Ahmed A, Makame J, Robert F, Julius K, Mecky M. Sero-prevalence and spatial  
1260 distribution of Rift Valley fever infection among agro-pastoral and pastoral communities  
1261 during interepidemic period in the Serengeti ecosystem, northern Tanzania. *BMC Infect*  
1262 *Dis.* 2018;18(1):276. Epub 2018/06/15. doi: 10.1186/s12879-018-3183-9.
- 1263  
1264 34. Tigoï C, Sang R, Chepkorir E, Orindi B, Arum SO, Mulwa F, et al. High risk for  
1265 human exposure to Rift Valley fever virus in communities living along livestock  
1266 movement routes: A cross-sectional survey in Kenya. *PLoS Negl Trop Dis.*  
1267 2020;14(2):e0007979. Epub 2020/02/23. doi: 10.1371/journal.pntd.0007979.
- 1268  
1269 35. Sanderson CE, Jori F, Moolla N, Paweska JT, Oumer N, Alexander KA. Silent  
1270 circulation of Rift Valley fever in humans, Botswana, 2013-2014. *Emerg Infect Dis.*  
1271 2020;26(10):2453-2456. Epub 2020/09/19. doi: 10.3201/eid2610.191837.
- 1272  
1273 36. Schoepp RJ, Rossi CA, Khan SH, Goba A, Fair JN. Undiagnosed acute viral febrile  
1274 illnesses, Sierra Leone. *Emerging Infectious Diseases.* 2014;20(7):1176-1182. doi:  
1275 10.3201/eid2007.131265.
- 1276  
1277 37. Bosworth A, Ghabbari T, Dowall S, Varghese A, Fares W, Hewson R, et al.  
1278 Serologic evidence of exposure to Rift Valley fever virus detected in Tunisia. *New*  
1279 *Microbes New Infect.* 2016;9:1-7. doi: 10.1016/j.nmni.2015.10.010.
- 1280  
1281 38. Dellagi K, Salez N, Maquart M, Larrieu S, Yssouf A, Silai R, et al. Serological  
1282 evidence of contrasted exposure to arboviral infections between islands of the Union of  
1283 Comoros (Indian Ocean). *PloS Neglected Tropical Diseases.* 2016;10(12). doi:  
1284 10.1371/journal.pntd.0004840.
- 1285  
1286 39. Durand JP, Bouloy M, Richecoeur L, Peyrefitte CN, Tolou H. Rift Valley fever virus  
1287 infection among French troops in Chad. *Emerg Infect Dis.* 2003;9(6):751-752. Epub  
1288 2003/06/05. doi: 10.3201/eid0906.020647.

- 1289  
1290 40. Guillebaud J, Bernardson B, Randriambolamanantsoa TH, Randrianasolo L,  
1291 Randriamampionona JL, Marino CA, et al. Study on causes of fever in primary  
1292 healthcare center uncovers pathogens of public health concern in Madagascar. PLoS  
1293 Negl Trop Dis. 2018;12(7):e0006642. Epub 2018/07/17. doi:  
1294 10.1371/journal.pntd.0006642.
- 1295  
1296 41. Gudo ES, Pinto G, Weyer J, le Roux C, Mandlaze A, José AF, et al. Serological  
1297 evidence of rift valley fever virus among acute febrile patients in Southern Mozambique  
1298 during and after the 2013 heavy rainfall and flooding: implication for the management of  
1299 febrile illness. Virol J. 2016;13:96. Epub 2016/06/10. doi: 10.1186/s12985-016-0542-2.
- 1300  
1301 42. Sow A, Faye O, Faye O, Diallo D, Sadio BD, Weaver SC, et al. Rift Valley fever in  
1302 Kedougou, southeastern Senegal, 2012. Emerg Infect Dis. 2014;20(3):504-506. Epub  
1303 2014/02/26. doi: 10.3201/eid2003.131174.
- 1304  
1305 43. Sumaye RD, Abatih EN, Thiry E, Amuri M, Berkvens D, Geubbels E. Inter-epidemic  
1306 acquisition of Rift Valley fever virus in humans in Tanzania. PLoS Negl Trop Dis.  
1307 2015;9(2):e0003536. Epub 2015/02/28. doi: 10.1371/journal.pntd.0003536.
- 1308  
1309 44. Liu J, Sun Y, Shi W, Tan S, Pan Y, Cui S, et al. The first imported case of Rift  
1310 Valley fever in China reveals a genetic reassortment of different viral lineages. Emerg  
1311 Microbes Infect. 2017;6(1):e4. Epub 2017/01/18. doi: 10.1038/emi.2016.136.
- 1312  
1313 45. Oltmann A, Kämper S, Staeck O, Schmidt-Chanasit J, Günther S, Berg T, et al.  
1314 Fatal outcome of hepatitis A virus (HAV) infection in a traveler with incomplete HAV  
1315 vaccination and evidence of Rift Valley fever virus infection. J Clin Microbiol.  
1316 2008;46(11):3850-3852. Epub 2008/09/05. doi: 10.1128/jcm.01102-08.
- 1317  
1318 46. Evans A, Gakuya F, Paweska JT, Rostal M, Akoolo L, Van Vuren PJ, et al.  
1319 Prevalence of antibodies against Rift Valley fever virus in Kenyan wildlife. Epidemiology  
1320 and Infection. 2008;136(9):1261-1269. doi: 10.1017/S0950268807009806.
- 1321  
1322 47. LaBeaud AD, Cross PC, Getz WM, Glinka A, King CH. Rift Valley fever virus  
1323 infection in African Buffalo (*Syncerus caffer*) herds in rural South Africa: Evidence of  
1324 interepidemic transmission. American Journal of Tropical Medicine and Hygiene.  
1325 2011;84(4):641-646. doi: 10.4269/ajtmh.2011.10-0187.
- 1326

- 1327 48. Olive MM, Goodman SM, Reynes JM. The role of wild mammals in the  
1328 maintenance of Rift Valley fever virus. *J Wildl Dis.* 2012;48(2):241-266. doi:  
1329 10.7589/0090-3558-48.2.241.
- 1330
- 1331 49. Rostal MK, Evans AL, Sang R, Gikundi S, Wakhule L, Munyua P, et al.  
1332 Identification of potential vectors of and detection of antibodies against Rift Valley fever  
1333 virus in livestock during interepizootic periods. *American Journal of Veterinary*  
1334 *Research.* 2010;71(5):522-526. doi: 10.2460/ajvr.71.5.522.
- 1335
- 1336 50. Page MJ, McKenzie JE, Bossuyt PM, Boutron I, Hoffmann TC, Mulrow CD, et al.  
1337 The PRISMA 2020 statement: an updated guideline for reporting systematic reviews.  
1338 *Bmj.* 2021;372:n71. doi: 10.1136/bmj.n71.
- 1339
- 1340 51. García-Bocanegra I, Paniagua J, Cano-Terriza D, Arenas-Montes A, Fernández-  
1341 Morente M, Napp S. Absence of Rift Valley fever virus in domestic and wild ruminants  
1342 from Spain. *Vet Rec.* 2016;179(2):48. Epub 2016/05/11. doi: 10.1136/vr.103696.
- 1343
- 1344 52. Mentaberre G, Gutierrez C, Rodriguez NF, Joseph S, Gonzalez-Barrio D, Cabezon  
1345 O, et al. A transversal study on antibodies against selected pathogens in dromedary  
1346 camels in the Canary Islands, Spain. *Veterinary Microbiology.* 2013;167(3-4):468-473.  
1347 doi: 10.1016/j.vetmic.2013.07.029.
- 1348
- 1349 53. Bazanow BA, Stygar D, Romuk E, Skrzep-Poloczek B, Pacon J, Gadzala L, et al.  
1350 Preliminary serological investigation of Rift Valley fever in Poland. *Journal of Vector*  
1351 *Borne Diseases.* 2018;55(4):324-326. doi: 10.4103/0972-9062.256570.
- 1352
- 1353 54. Kim HJ, Park JY, Jeoung HY, Yeh JY, Cho YS, Choi JS, et al. Serological  
1354 surveillance studies confirm the Rift Valley fever virus free status in South Korea. *Trop*  
1355 *Anim Health Prod.* 2015;47(7):1427-1430. doi: 10.1007/s11250-015-0858-8.
- 1356
- 1357 55. Batieha A, Saliba EK, Graham R, Mohareb E, Hijazi Y, Wijeyaratne P.  
1358 Seroprevalence of West Nile, Rift Valley, and sandfly arboviruses in Hashimiah, Jordan.  
1359 *Emerg Infect Dis.* 2000;6(4):358-362. Epub 2000/07/25. doi: 10.3201/eid0604.000405.
- 1360
- 1361 56. Freeman MC, Garn JV, Sclar GD, Boisson S, Medlicott K, Alexander KT, et al. The  
1362 impact of sanitation on infectious disease and nutritional status: A systematic review  
1363 and meta-analysis. *Int J Hyg Environ Health.* 2017;220(6):928-949. doi:  
1364 10.1016/j.ijheh.2017.05.007.
- 1365

- 1366 57. Puzzolo E, Pope D, Stanistreet D, Rehfuess EA, Bruce NG. Clean fuels for  
1367 resource-poor settings: A systematic review of barriers and enablers to adoption and  
1368 sustained use. *Environ Res.* 2016;146:218-234. doi: 10.1016/j.envres.2016.01.002.
- 1369
- 1370 58. Hardcastle AN, Osborne JCP, Ramshaw RE, Hulland EN, Morgan JD, Miller-Petrie  
1371 MK, et al. Informing Rift Valley fever preparedness by mapping seasonally varying  
1372 environmental suitability. *Int J Infect Dis.* 2020;99:362-372. Epub 2020/08/02. doi:  
1373 10.1016/j.ijid.2020.07.043.
- 1374
- 1375 59. Redding DW, Tiedt S, Lo Iacono G, Bett B, Jones KE. Spatial, seasonal and  
1376 climatic predictive models of Rift Valley fever disease across Africa. *Philos Trans R Soc  
1377 Lond B Biol Sci.* 2017;372(1725). Epub 2017/06/07. doi: 10.1098/rstb.2016.0165.
- 1378
- 1379 60. Williams R, Malherbe J, Weepener H, Majiwa P, Swanepoel R. Anomalous high  
1380 rainfall and soil saturation as combined risk indicator of Rift Valley fever outbreaks,  
1381 South Africa, 2008-2011. *Emerg Infect Dis.* 2016;22(12):2054-2062. Epub 2016/07/13.  
1382 doi: 10.3201/eid2212.151352.
- 1383
- 1384 61. Hightower A, Kinkade C, Nguku PM, Anyangu A, Mutonga D, Omolo J, et al.  
1385 Relationship of climate, geography, and geology to the incidence of Rift Valley fever in  
1386 Kenya during the 2006-2007 outbreak. *American Journal of Tropical Medicine and  
1387 Hygiene.* 2012;86(2):373-380. doi: 10.4269/ajtmh.2012.11-0450.
- 1388
- 1389 62. Verster AM, Liang JE, Rostal MK, Kemp A, Brand RF, Anyamba A, et al. Selected  
1390 wetland soil properties correlate to Rift Valley fever livestock mortalities reported in  
1391 2009-10 in central South Africa. *PLoS One.* 2020;15(5):e0232481. Epub 2020/05/19.  
1392 doi: 10.1371/journal.pone.0232481.
- 1393
- 1394 63. Sindato C, Pfeiffer DU, Karimuribo ED, Mboera LE, Rweyemamu MM, Paweska JT.  
1395 A spatial analysis of Rift Valley fever virus seropositivity in domestic ruminants in  
1396 Tanzania. *PLoS One.* 2015;10(7):e0131873. Epub 2015/07/15. doi:  
1397 10.1371/journal.pone.0131873.
- 1398
- 1399 64. Nicholas DE, Jacobsen KH, Waters NM. Risk factors associated with human Rift  
1400 Valley fever infection: systematic review and meta-analysis. *Trop Med Int Health.*  
1401 2014;19(12):1420-1429. doi: 10.1111/tmi.12385.
- 1402
- 1403 65. Higgins JP, Thompson SG. Quantifying heterogeneity in a meta-analysis. *Stat Med.*  
1404 2002;21(11):1539-1558. Epub 2002/07/12. doi: 10.1002/sim.1186.
- 1405

- 1406 66. Deeks JJ, Altman DG, Bradburn MJ. Statistical methods for examining  
1407 heterogeneity and combining results from several studies in meta-analysis. In: Egger M,  
1408 Smith GD, Altman DG, editors. *Systematic Reviews in Health Care: Meta-analysis in*  
1409 *Context*. London: BMJ Books; 2001. p. 285-312.
- 1410  
1411 67. Clark MHA, Warimwe GM, Di Nardo A, Lyons NA, Gubbins S. Systematic literature  
1412 review of Rift Valley fever virus seroprevalence in livestock, wildlife and humans in  
1413 Africa from 1968 to 2016. *PLoS Neglected Tropical Diseases*. 2018;12(7). doi:  
1414 10.1371/journal.pntd.0006627.
- 1415  
1416 68. LaBeaud AD, Muchiri EM, Ndzovu M, Mwanje MT, Muiruri S, Peters CJ, et al.  
1417 Interepidemic Rift Valley fever virus seropositivity, northeastern Kenya. *Emerg Infect*  
1418 *Dis*. 2008;14(8):1240-1246. doi: 10.3201/eid1408.080082.
- 1419  
1420 69. McElroy AK, Albariño CG, Nichol ST. Development of a RVFV ELISA that can  
1421 distinguish infected from vaccinated animals. *Virol J*. 2009;6:125. Epub 2009/08/15. doi:  
1422 10.1186/1743-422x-6-125.
- 1423  
1424 70. Paweska JT, Burt FJ, Swanepoel R. Validation of IgG-sandwich and IgM-capture  
1425 ELISA for the detection of antibody to Rift Valley fever virus in humans. *J Virol Methods*.  
1426 2005;124(1-2):173-181. Epub 2005/01/25. doi: 10.1016/j.jviromet.2004.11.020.
- 1427  
1428 71. Paweska JT, Jansen van Vuren P, Swanepoel R. Validation of an indirect ELISA  
1429 based on a recombinant nucleocapsid protein of Rift Valley fever virus for the detection  
1430 of IgG antibody in humans. *J Virol Methods*. 2007;146(1-2):119-124. Epub 2007/07/25.  
1431 doi: 10.1016/j.jviromet.2007.06.006.
- 1432  
1433 72. Jansen van Vuren P, Paweska JT. Laboratory safe detection of nucleocapsid  
1434 protein of Rift Valley fever virus in human and animal specimens by a sandwich ELISA.  
1435 *J Virol Methods*. 2009;157(1):15-24. Epub 2009/01/07. doi:  
1436 10.1016/j.jviromet.2008.12.003.
- 1437  
1438 73. Wichgers Schreur PJ, Paweska JT, Kant J, Kortekaas J. A novel highly sensitive,  
1439 rapid and safe Rift Valley fever virus neutralization test. *J Virol Methods*. 2017;248:26-  
1440 30. doi: 10.1016/j.jviromet.2017.06.001.
- 1441  
1442 74. Sobarzo A, Paweska JT, Herrmann S, Amir T, Marks RS, Lobel L. Optical fiber  
1443 immunosensor for the detection of IgG antibody to Rift Valley fever virus in humans.  
1444 *Journal of Virological Methods*. 2007;146(1-2):327-334. doi:  
1445 10.1016/j.jviromet.2007.07.017.

- 1446  
1447 75. van der Wal FJ, Achterberg RP, de Boer SM, Boshra H, Brun A, Maassen CB, et al.  
1448 Bead-based suspension array for simultaneous detection of antibodies against the Rift  
1449 Valley fever virus nucleocapsid and Gn glycoprotein. *J Virol Methods*. 2012;183(2):99-  
1450 105. doi: 10.1016/j.jviromet.2012.03.008.
- 1451  
1452 76. Petrova V, Kristiansen P, Norheim G, Yimer SA. Rift valley fever: diagnostic  
1453 challenges and investment needs for vaccine development. *BMJ Glob Health*.  
1454 2020;5(8). Epub 2020/08/21. doi: 10.1136/bmjgh-2020-002694.
- 1455  
1456 77. Beechler BR, Manore CA, Reininghaus B, O'Neal D, Gorsich EE, Ezenwa VO, et al.  
1457 Enemies and turncoats: bovine tuberculosis exposes pathogenic potential of Rift Valley  
1458 fever virus in a common host, African buffalo (*Syncerus caffer*). *Proc Biol Sci*.  
1459 2015;282(1805). Epub 2015/03/20. doi: 10.1098/rspb.2014.2942.
- 1460  
1461 78. Capobianco Dondona A, Aschenborn O, Pinoni C, Di Gialleonardo L, Maseke A,  
1462 Bortone G, et al. Rift Valley fever virus among wild ruminants, Etosha National Park,  
1463 Namibia, 2011. *Emerg Infect Dis*. 2016;22(1):128-130. doi: 10.3201/eid2201.150725.
- 1464  
1465 79. Sindato C, Swai ES, Karimuribo ED, Dautu G, Pfeiffer DU, Mboera LEG, et al.  
1466 Spatial distribution of non-clinical Rift Valley fever viral activity in domestic and wild  
1467 ruminants in northern Tanzania. *Tanzania Veterinary Journal*. 2013;28 (Special):21-38.
- 1468  
1469 80. Selmi R, Mamlouk A, Ben Said M, Ben Yahia H, Abdelaali H, Ben Chehida F, et al.  
1470 First serological evidence of the Rift Valley fever Phlebovirus in Tunisian camels. *Acta  
1471 Trop*. 2020;207:105462. Epub 2020/04/24. doi: 10.1016/j.actatropica.2020.105462.
- 1472  
1473 81. Di Nardo A, Rossi D, Saleh SM, Lejlifa SM, Hamdi SJ, Di Gennaro A, et al.  
1474 Evidence of Rift Valley fever seroprevalence in the Sahrawi semi-nomadic pastoralist  
1475 system, Western Sahara. *BMC Vet Res*. 2014;10:92. Epub 2014/04/25. doi:  
1476 10.1186/1746-6148-10-92.
- 1477  
1478 82. Kanouté YB, Gagnon BG, Schindler C, Bonfoh B, Schelling E. Epidemiology of  
1479 brucellosis, Q Fever and Rift Valley fever at the human and livestock interface in  
1480 northern Côte d'Ivoire. *Acta Trop*. 2017;165:66-75. Epub 2016/02/24. doi:  
1481 10.1016/j.actatropica.2016.02.012.
- 1482  
1483 83. Andayi F, Charrel RN, Kieffer A, Richet H, Pastorino B, Leparç-Goffart I, et al. A  
1484 sero-epidemiological study of arboviral fevers in Djibouti, Horn of Africa. *PLoS Negl  
1485 Trop Dis*. 2014;8(12):e3299. Epub 2014/12/17. doi: 10.1371/journal.pntd.0003299.



- 1486  
1487 84. Umehoza T, Berkvens D, Gafarasi I, Rukelibuga J, Mushonga B, Biryomumaisho S.  
1488 Seroprevalence of Rift Valley fever in cattle along the Akagera-Nyabarongo rivers,  
1489 Rwanda. *J S Afr Vet Assoc.* 2017;88(0):e1-e5. doi: 10.4102/jsava.v88i0.1379.
- 1490  
1491 85. Dutuze MF, Ingabire A, Gafarasi I, Uwituze S, Nzayirambaho M, Christofferson RC.  
1492 Identification of Bunyamwera and possible other Orthobunyavirus infections and  
1493 disease in cattle during a Rift Valley fever outbreak in Rwanda in 2018. *Am J Trop Med*  
1494 *Hyg.* 2020;103(1):183-189. Epub 2020/04/22. doi: 10.4269/ajtmh.19-0596.
- 1495  
1496 86. Bonney JH, Osei-Kwasi M, Adiku TK, Barnor JS, Amesiya R, Kubio C, et al.  
1497 Hospital-based surveillance for viral hemorrhagic fevers and hepatitides in Ghana.  
1498 *PLoS Negl Trop Dis.* 2013;7(9):e2435. Epub 2013/09/27. doi:  
1499 10.1371/journal.pntd.0002435.
- 1500  
1501 87. Bird BH, Githinji JW, Macharia JM, Kasiiti JL, Muriithi RM, Gacheru SG, et al.  
1502 Multiple virus lineages sharing recent common ancestry were associated with a large  
1503 Rift Valley fever outbreak among livestock in Kenya during 2006-2007. *J Virol.*  
1504 2008;82(22):11152-11166. doi: 10.1128/JVI.01519-08.
- 1505  
1506 88. Miller BR, Godsey MS, Crabtree MB, Savage HM, Al-Mazrao Y, Al-Jeffri MH, et al.  
1507 Isolation and genetic characterization of Rift Valley fever virus from *Aedes vexans*  
1508 *arabiensis*, Kingdom of Saudi Arabia. *Emerg Infect Dis.* 2002;8(12):1492-1494. Epub  
1509 2002/12/25. doi: 10.3201/eid0812.020194.
- 1510  
1511 89. Nderitu L, Lee JS, Omolo J, Omulo S, O'Guinn ML, Hightower A, et al. Sequential  
1512 Rift Valley fever outbreaks in eastern Africa caused by multiple lineages of the virus. *J*  
1513 *Infect Dis.* 2011;203(5):655-665. doi: 10.1093/infdis/jjq004.
- 1514  
1515 90. Maquart M, Pascalis H, Abdouroihmane S, Roger M, Abdourahime F, Cardinale E,  
1516 et al. Phylogeographic reconstructions of a Rift Valley fever virus strain reveals  
1517 transboundary animal movements from eastern continental Africa to the Union of the  
1518 Comoros. *Transbound Emerg Dis.* 2016;63(2):e281-285. Epub 2014/09/13. doi:  
1519 10.1111/tbed.12267.
- 1520  
1521 91. Ratovonjato J, Olive MM, Tantely LM, Andrianaivolambo L, Tata E, Razainirina J, et  
1522 al. Detection, isolation, and genetic characterization of Rift Valley fever virus from  
1523 *Anopheles (Anopheles) coustani*, *Anopheles (Anopheles) squamosus*, and *Culex*  
1524 (*Culex*) *antennatus* of the Haute Matsiatra region, Madagascar. *Vector Borne Zoonotic*  
1525 *Dis.* 2011;11(6):753-759. Epub 2010/10/30. doi: 10.1089/vbz.2010.0031.

- 1526  
1527 92. Andriamandimby SF, Randrianarivo-Solofoniaina AE, Jeanmaire EM,  
1528 Ravololomanana L, Razafimanantsoa LT, Rakotojoelinandrasana T, et al. Rift Valley  
1529 fever during rainy seasons, Madagascar, 2008 and 2009. *Emerg Infect Dis.*  
1530 2010;16(6):963-970. doi: 10.3201/eid1606.091266.
- 1531  
1532 93. Faye O, Ba H, Ba Y, Freire CC, Faye O, Ndiaye O, et al. Reemergence of Rift  
1533 Valley fever, Mauritania, 2010. *Emerg Infect Dis.* 2014;20(2):300-303. Epub 2014/01/23.  
1534 doi: 10.3201/eid2002.130996.
- 1535  
1536 94. Sow A, Faye O, Ba Y, Diallo D, Fall G, Faye O, et al. Widespread Rift Valley fever  
1537 emergence in Senegal in 2013-2014. *Open Forum Infect Dis.* 2016;3(3):ofw149. Epub  
1538 2016/10/06. doi: 10.1093/ofid/ofw149.
- 1539  
1540 95. Sow A, Faye O, Ba Y, Ba H, Diallo D, Faye O, et al. Rift Valley fever outbreak,  
1541 southern Mauritania, 2012. *Emerg Infect Dis.* 2014;20(2):296-299. Epub 2014/01/23.  
1542 doi: 10.3201/eid2002.131000.
- 1543  
1544 96. Lagare A, Fall G, Ibrahim A, Ousmane S, Sadio B, Abdoulaye M, et al. First  
1545 occurrence of Rift Valley fever outbreak in Niger, 2016. *Vet Med Sci.* 2019;5(1):70-78.  
1546 Epub 2018/11/10. doi: 10.1002/vms3.135.
- 1547  
1548 97. Grobbelaar AA, Weyer J, Leman PA, Kemp A, Paweska JT, Swanepoel R.  
1549 Molecular epidemiology of Rift Valley fever virus. *Emerg Infect Dis.* 2011;17(12):2270-  
1550 2276. Epub 2011/12/17. doi: 10.3201/eid1712.111035.
- 1551  
1552 98. van Schalkwyk A, Gwala S, Schuck KN, Quan M, Davis AS, Romito M, et al.  
1553 Retrospective phylogenetic analyses of formalin-fixed paraffin-embedded samples from  
1554 the 2011 Rift Valley fever outbreak in South Africa, through sequencing of targeted  
1555 regions. *J Virol Methods.* 2020;287:114003. Epub 2020/11/10. doi:  
1556 10.1016/j.jviromet.2020.114003.
- 1557  
1558 99. van Schalkwyk A, Romito M. Genomic characterization of Rift Valley fever virus,  
1559 South Africa, 2018. *Emerg Infect Dis.* 2019;25(10):1979-1981. Epub 2019/09/21. doi:  
1560 10.3201/eid2510.181748.
- 1561  
1562 100. Liu W, Sun FJ, Tong YG, Zhang SQ, Cao WC. Rift Valley fever virus imported into  
1563 China from Angola. *Lancet Infect Dis.* 2016;16(11):1226. Epub 2016/10/30. doi:  
1564 10.1016/s1473-3099(16)30401-7.
- 1565

- 1566 101. Grobbelaar AA, Weyer J, Leman P, Kemp A, Paweska JT. Phylogeny of Rift Valley  
1567 fever virus isolates recovered from humans during 2008-2011 disease outbreaks in  
1568 South Africa. *International Journal of Infectious Diseases*. 2014;21:224-224. doi:  
1569 10.1016/j.ijid.2014.03.887.
- 1570  
1571 102. Bett B, Said MY, Sang R, Bukachi S, Wanyoike S, Kifugo SC, et al. Effects of flood  
1572 irrigation on the risk of selected zoonotic pathogens in an arid and semi-arid area in the  
1573 eastern Kenya. *PLoS One*. 2017;12(5). doi: 10.1371/journal.pone.0172626.
- 1574  
1575 103. LaBeaud AD, Muiruri S, Sutherland LJ, Dahir S, Gildengorin G, Morrill J, et al.  
1576 Postepidemic analysis of Rift Valley fever virus transmission in northeastern Kenya: a  
1577 village cohort study. *PLoS Negl Trop Dis*. 2011;5(8):e1265. doi:  
1578 10.1371/journal.pntd.0001265.
- 1579  
1580 104. Arishi H, Ageel A, Rahman MA, Al Hazmi A, Arishi AR, Ayoola B, et al. Update:  
1581 Outbreak of Rift Valley fever - Saudi Arabia, August-November 2000 (Reprinted from  
1582 *MMWR*, vol 49, pg 982-986, 2000). *Journal of the American Medical Association*.  
1583 2000;284(23):2989-2990.
- 1584  
1585 105. Rift Valley fever, Saudi Arabia, August-October 2000. *Wkly Epidemiol Rec*.  
1586 2000;75(46):370-371. Epub 2001/01/06.
- 1587  
1588 106. Outbreak of Rift Valley fever, Yemen, August-October 2000. *Wkly Epidemiol Rec*.  
1589 2000;75(48):392-395. Epub 2001/01/06.
- 1590  
1591 107. Hanafi HA, Fryauff DJ, Saad MD, Soliman AK, Mohareb EW, Medhat I, et al. Virus  
1592 isolations and high population density implicate *Culex antennatus* (Becker) (Diptera:  
1593 Culicidae) as a vector of Rift Valley fever virus during an outbreak in the Nile Delta of  
1594 Egypt. *Acta Trop*. 2011;119(2-3):119-124. Epub 2011/05/17. doi:  
1595 10.1016/j.actatropica.2011.04.018.
- 1596  
1597 108. Faye O, Diallo M, Diop D, Bezeid OE, Bâ H, Niang M, et al. Rift Valley fever  
1598 outbreak with East-Central African virus lineage in Mauritania, 2003. *Emerg Infect Dis*.  
1599 2007;13(7):1016-1023. Epub 2008/01/25. doi: 10.3201/eid1307.061487.
- 1600  
1601 109. Sindato C, Karimuribo ED, Pfeiffer DU, Mboera LE, Kivaria F, Dautu G, et al.  
1602 Spatial and temporal pattern of Rift Valley fever outbreaks in Tanzania; 1930 to 2007.  
1603 *PLoS One*. 2014;9(2):e88897. Epub 2014/03/04. doi: 10.1371/journal.pone.0088897.
- 1604

- 1605 110. El Mamy AB, Baba MO, Barry Y, Isselmou K, Dia ML, El Kory MO, et al.  
1606 Unexpected Rift Valley fever outbreak, northern Mauritania. *Emerg Infect Dis.*  
1607 2011;17(10):1894-1896. Epub 2011/10/18. doi: 10.3201/eid1710.110397.
- 1608  
1609 111. El Mamy AB, Kane Y, El Arbi AS, Barry Y, Bernard C, Lancelot R, et al. L'épidémie  
1610 de la fièvre de la Vallé du Rift en 2012 en Mauritanie. *Revue Africaine de Santé et*  
1611 *Productions Animales.* 2014;12(3-4):169-173.
- 1612  
1613 112. Shoemaker T, Balinandi S, Nyakarahuka L, Ojwang J, Tumusiime A, Mulei S, et al.  
1614 First laboratory confirmation of an outbreak of Rift Valley fever virus in 50 Years in  
1615 Kabale District, southwestern Uganda. *American Journal of Tropical Medicine and*  
1616 *Hygiene.* 2017;95(5):437-437.
- 1617  
1618 113. Hassan A, Muturi M, Mwatondo A, Omolo J, Bett B, Gikundi S, et al.  
1619 Epidemiological investigation of a Rift Valley fever outbreak in humans and livestock in  
1620 Kenya, 2018. *Am J Trop Med Hyg.* 2020;103(4):1649-1655. Epub 2020/08/05. doi:  
1621 10.4269/ajtmh.20-0387.
- 1622  
1623 114. Youssouf H, Subiros M, Denetiere G, Collet L, Dommergues L, Pauvert A, et al.  
1624 Rift Valley fever outbreak, Mayotte, France, 2018-2019. *Emerg Infect Dis.*  
1625 2020;26(4):769-772. Epub 2020/03/19. doi: 10.3201/eid2604.191147.
- 1626  
1627 115. van Vuren PJ, Kgaladi J, Patharoo V, Ohaebosim P, Msimang V, Nyokong B, et al.  
1628 Human cases of Rift Valley fever in South Africa, 2018. *Vector-Borne and Zoonotic*  
1629 *Diseases.* 2018;18(12):713-715. doi: 10.1089/vbz.2018.2357.
- 1630  
1631 116. Youssef HM, Ghoneim MA, al. e. Recent trends for diagnosis of Rift Valley  
1632 fever in animals and mosquitoes in Egypt with special reference to the carrier.  
1633 *Global Veterinaria.* 2008;2(1).
- 1634  
1635 117. Jeffries CL, Tantely LM, Raharimalala FN, Hurn E, Boyer S, Walker T. Diverse  
1636 novel resident *Wolbachia* strains in Culicine mosquitoes from Madagascar. *Scientific*  
1637 *Reports.* 2018;8. doi: 10.1038/s41598-018-35658-z.
- 1638  
1639 118. Ndiaye EH, Diallo D, Fall G, Ba Y, Faye O, Dia I, et al. Arboviruses isolated from  
1640 the Barkedji mosquito-based surveillance system, 2012-2013. *BMC Infect Dis.*  
1641 2018;18(1):642. Epub 2018/12/14. doi: 10.1186/s12879-018-3538-2.
- 1642

- 1643 119. Abdelgadir DM, Bashab HMM, Mohamed RAE, Abuelmaali SA. Risk factor  
1644 analysis for outbreak of Rift Valley fever in Khartoum State of Sudan. *Journal of*  
1645 *Entomological Science*. 2010;45(3):239-251. doi: 10.18474/0749-8004-45.3.239.
- 1646
- 1647 120. Mbanzulu KM, Mboera LEG, Luzolo FK, Wumba R, Misinzo G, Kimera SI.  
1648 Mosquito-borne viral diseases in the Democratic Republic of the Congo: a review.  
1649 *Parasit Vectors*. 2020;13(1):103. Epub 2020/02/28. doi: 10.1186/s13071-020-3985-7.
- 1650
- 1651 121. Mohamed RAE, Mohamed N, Aleanizy FS, Alqahtani FY, Al Khalaf A, Al-Keridis  
1652 LA. Investigation of hemorrhagic fever viruses inside wild populations of ticks: One of  
1653 the pioneer studies in Saudi Arabia. *Asian Pacific Journal of Tropical Disease*.  
1654 2017;7:299-303.
- 1655
- 1656 122. Mohamed M, Mosha F, Mghamba J, Zaki SR, Shieh WJ, Paweska J, et al.  
1657 Epidemiologic and clinical aspects of a Rift Valley fever outbreak in humans in  
1658 Tanzania, 2007. *Am J Trop Med Hyg*. 2010;83(2 Suppl):22-27. doi:  
1659 10.4269/ajtmh.2010.09-0318.
- 1660
- 1661 123. LaBeaud AD, Pfeil S, Muiruri S, Dahir S, Sutherland LJ, Traylor Z, et al. Factors  
1662 associated with severe human Rift Valley fever in Sangailu, Garissa County, Kenya.  
1663 *PLoS Negl Trop Dis*. 2015;9(3):e0003548. Epub 2015/03/13. doi:  
1664 10.1371/journal.pntd.0003548.
- 1665
- 1666 124. Anyangu AS, Gould LH, Sharif SK, Nguku PM, Omolo JO, Mutonga D, et al. Risk  
1667 factors for severe Rift Valley fever infection in Kenya, 2007. *Am J Trop Med Hyg*.  
1668 2010;83(2 Suppl):14-21. doi: 10.4269/ajtmh.2010.09-0293.
- 1669
- 1670 125. Seufi AM, Galal FH. Role of *Culex* and *Anopheles* mosquito species as potential  
1671 vectors of Rift Valley fever virus in Sudan outbreak, 2007. *BMC Infect Dis*. 2010;10:65.  
1672 Epub 2010/03/13. doi: 10.1186/1471-2334-10-65.
- 1673
- 1674 126. Oyas H, Holmstrom L, Kemunto NP, Muturi M, Mwatondo A, Osoro E, et al.  
1675 Enhanced surveillance for Rift Valley fever in livestock during El Niño rains and threat of  
1676 RVF outbreak, Kenya, 2015-2016. *PLoS Negl Trop Dis*. 2018;12(4):e0006353. Epub  
1677 2018/04/27. doi: 10.1371/journal.pntd.0006353.
- 1678
- 1679 127. Bashir RSE, Hassan OA. A One Health perspective to identify environmental  
1680 factors that affect Rift Valley fever transmission in Gezira state, Central Sudan. *Tropical*  
1681 *Medicine and Health*. 2019;47(1). doi: 10.1186/s41182-019-0178-1.
- 1682

- 1683 128. van Vuren PJ, Shalekoff S, Grobbelaar AA, Archer BN, Thomas J, Tiemessen CT,  
1684 et al. Serum levels of inflammatory cytokines in Rift Valley fever patients are indicative  
1685 of severe disease. *Virology Journal*. 2015;12. doi: 10.1186/s12985-015-0392-3.
- 1686
- 1687 129. Outbreak news. Rift Valley fever, Kenya. *Wkly Epidemiol Rec*. 2007;82(3):17-18.  
1688 Epub 2007/01/24.
- 1689
- 1690 130. Madani TA, Al-Mazrou YY, Al-Jeffri MH, Mishkhas AA, Al-Rabeah AM, Turkistani  
1691 AM, et al. Rift Valley fever epidemic in Saudi Arabia: epidemiological, clinical, and  
1692 laboratory characteristics. *Clin Infect Dis*. 2003;37(8):1084-1092. doi: 10.1086/378747.
- 1693
- 1694 131. Njenga MK, Paweska J, Wanjala R, Rao CY, Weiner M, Omballa V, et al. Using a  
1695 field quantitative real-time PCR test to rapidly identify highly viremic rift valley fever  
1696 cases. *J Clin Microbiol*. 2009;47(4):1166-1171. Epub 2009/01/28. doi:  
1697 10.1128/jcm.01905-08.
- 1698
- 1699 132. Bett B, Lindahl J, Sang R, Wainaina M, Kairu-Wanyoike S, Bukachi S, et al.  
1700 Association between Rift Valley fever virus seroprevalences in livestock and humans  
1701 and their respective intra-cluster correlation coefficients, Tana River County, Kenya.  
1702 *Epidemiology and Infection*. 2019;147. doi: 10.1017/S0950268818003242.
- 1703
- 1704 133. Nicolas G, Chevalier V, Tantely LM, Fontenille D, Durand B. A spatially explicit  
1705 metapopulation model and cattle trade analysis suggests key determinants for the  
1706 recurrent circulation of Rift Valley fever virus in a pilot area of Madagascar highlands.  
1707 *PLoS Negl Trop Dis*. 2014;8(12):e3346. doi: 10.1371/journal.pntd.0003346.
- 1708
- 1709 134. Metras R, Cavalerie L, Dommergues L, Merot P, Edmunds WJ, Keeling MJ, et al.  
1710 The epidemiology of Rift Valley fever in Mayotte: insights and perspectives from 11  
1711 years of data. *PLoS Neglected Tropical Diseases*. 2016;10(6). doi:  
1712 10.1371/journal.pntd.0004783.
- 1713
- 1714 135. Alhaj M. Surveillance study on Rift Valley fever in Jazan region, Saudi Arabia. *Int J*  
1715 *Adv Sci Tech Res*. 2015;5(4):1-13.
- 1716
- 1717 136. Ngoshe YB, Avenant A, Rostal MK, Karesh WB, Paweska JT, Bagge W, et al.  
1718 Patterns of Rift Valley fever virus seropositivity in domestic ruminants in central South  
1719 Africa four years after a large outbreak. *Scientific Reports*. 2020;10(1). doi:  
1720 10.1038/s41598-020-62453-6.
- 1721

- 1722 137. Moiane B, Mapaco L, Thompson P, Berg M, Albihn A, Fafetine J. High  
1723 seroprevalence of Rift Valley fever phlebovirus in domestic ruminants and African  
1724 Buffaloes in Mozambique shows need for intensified surveillance. *Infect Ecol Epidemiol.*  
1725 2017;7(1):1416248. Epub 2018/01/13. doi: 10.1080/20008686.2017.1416248.
- 1726  
1727 138. Caron A, Cornelis D, Foggin C, Hofmeyr M, de Garine-Wichatitsky M. African  
1728 Buffalo movement and zoonotic disease risk across transfrontier conservation areas,  
1729 Southern Africa. *Emerg Infect Dis.* 2016;22(2):277-280. Epub 2016/01/27. doi:  
1730 10.3201/eid2202.140864.
- 1731  
1732 139. Byomi AM, Samaha HA, Zidan SA, Hadad GA. Some associated risk factors with  
1733 the occurrence of Rift Valley fever in animals and man in certain localities of Nile delta,  
1734 Egypt. *Assiut Veterinary Medical Journal.* 2015;61:10-17.
- 1735  
1736 140. Mohamed AM, Ashshi AM, Asghar AH, Abd El-Rahim IH, El-Shemi AG, Zafar T.  
1737 Seroepidemiological survey on Rift Valley fever among small ruminants and their close  
1738 human contacts in Makkah, Saudi Arabia, in 2011. *Rev Sci Tech.* 2014;33(3):903-915.  
1739 doi: 10.20506/rst.33.3.2328.
- 1740  
1741 141. Wensman JJ, Lindahl J, Wachtmeister N, Torsson E, Gwakisa P, Kasanga C, et  
1742 al. A study of Rift Valley fever virus in Morogoro and Arusha regions of Tanzania -  
1743 serology and farmers' perceptions. *Infect Ecol Epidemiol.* 2015;5:30025. doi:  
1744 10.3402/iee.v5.30025.
- 1745  
1746 142. Elfadil AA, Hasab-Allah KA, Dafa-Allah OM. Factors associated with Rift Valley  
1747 fever in south-west Saudi Arabia. *Rev Sci Tech.* 2006;25(3):1137-1145.
- 1748  
1749 143. Mdlulwa Z, Ngwane CB. Evaluating the impact of 2010 Rift Valley fever outbreaks  
1750 on sheep numbers in three provinces of South Africa. *African Journal of Agricultural*  
1751 *Research.* 2017;12(11):979-986.
- 1752  
1753 144. Mroz C, Gwida M, El-Ashker M, Ziegler U, Homeier-Bachmann T, Eiden M, et al.  
1754 Rift Valley fever virus infections in Egyptian cattle and their prevention. *Transbound*  
1755 *Emerg Dis.* 2017;64(6):2049-2058. Epub 2017/01/25. doi: 10.1111/tbed.12616.
- 1756  
1757 145. Abbas B, Yousif MA, M. NH. Animal health constraints to livestock exports from  
1758 the Horn of Africa. *Rev Sci Tech.* 2014;33(3): 711-721.
- 1759

- 1760 146. Mohamed AM, Ghazi H, Ashshi AM, Faidah HS, Clinical EIA. Serological survey of  
1761 Rift Valley fever among sacrifice animals in holy Mecca during pilgrimage season. . Int J  
1762 Trop Med. 2011;6(4):85–89.
- 1763  
1764 147. Tong C, Javelle E, Grard G, Dia A, Lacrosse C, Fourié T, et al. Tracking Rift Valley  
1765 fever: From Mali to Europe and other countries, 2016. Euro Surveill. 2019;24(8). Epub  
1766 2019/02/28. doi: 10.2807/1560-7917.es.2019.24.8.1800213.
- 1767  
1768 148. Liu B, Ma J, Jiao Z, Gao X, Xiao J, Wang H. Risk assessment for the Rift Valley  
1769 fever occurrence in China: Special concern in south-west border areas. Transbound  
1770 Emerg Dis. 2020. Epub 2020/06/23. doi: 10.1111/tbed.13695.
- 1771  
1772 149. Grossi-Soyster EN, LaBeaud AD. Rift Valley fever: Important considerations for  
1773 risk mitigation and future outbreaks. Trop Med Infect Dis. 2020;5(2). doi:  
1774 10.3390/tropicalmed5020089.
- 1775  
1776 150. O'Hearn AE, Voorhees MA, Fetterer DP, Wauquier N, Coomber MR, Bangura J, et  
1777 al. Serosurveillance of viral pathogens circulating in West Africa. Virol J.  
1778 2016;13(1):163. Epub 2016/10/08. doi: 10.1186/s12985-016-0621-4.
- 1779  
1780 151. LaBeaud AD, Ochiai Y, Peters CJ, Muchiri EM, King CH. Spectrum of Rift Valley  
1781 fever virus transmission in Kenya: Insights from three distinct regions. American Journal  
1782 of Tropical Medicine and Hygiene. 2007;76(5):795-800. doi:  
1783 10.4269/ajtmh.2007.76.795.
- 1784  
1785 152. Grossi-Soyster EN, Banda T, Teng CY, Muchiri EM, Mungai PL, Mutuku FM, et al.  
1786 Rift Valley fever seroprevalence in coastal Kenya. Am J Trop Med Hyg. 2017;97(1):115-  
1787 120. Epub 2017/07/19. doi: 10.4269/ajtmh.17-0104.
- 1788  
1789 153. Cook EAJ, Grossi-Soyster EN, de Glanville WA, Thomas LF, Kariuki S, Bronsvort  
1790 BMD, et al. The sero-epidemiology of Rift Valley fever in people in the Lake Victoria  
1791 Basin of western Kenya. Plos Neglected Tropical Diseases. 2017;11(7). doi:  
1792 10.1371/journal.pntd.0005731.
- 1793  
1794 154. Gray GC, Anderson BD, LaBeaud AD, Heraud JM, Fevre EM, Andriamandimby  
1795 SF, et al. Seroepidemiological study of interepidemic Rift Valley fever virus infection  
1796 among persons with intense ruminant exposure in Madagascar and Kenya. Am J Trop  
1797 Med Hyg. 2015;93(6):1364-1370. doi: 10.4269/ajtmh.15-0383.
- 1798



- 1799 155. LaBeaud AD, Bashir F, King CH. Measuring the burden of arboviral diseases: the  
1800 spectrum of morbidity and mortality from four prevalent infections. *Population Health*  
1801 *Metrics*. 2011;9. doi: 10.1186/1478-7954-9-1.
- 1802
- 1803 156. Muiruri S, Kabiru EW, Muchiri EM, Hussein H, Kagonda F, LaBeaud AD, et al.  
1804 Cross-sectional survey of Rift Valley fever virus exposure in Bodhei village located in a  
1805 transitional coastal forest habitat in Lamu County, Kenya. *Am J Trop Med Hyg*.  
1806 2015;92(2):394-400. Epub 2014/12/24. doi: 10.4269/ajtmh.14-0440.
- 1807
- 1808 157. Nanyingi MO, Munyua P, Kiama SG, Muchemi GM, Thumbi SM, Bitek AO, et al. A  
1809 systematic review of Rift Valley fever epidemiology 1931-2014. *Infect Ecol Epidemiol*.  
1810 2015;5:28024. Epub 2015/08/04. doi: 10.3402/iee.v5.28024.
- 1811
- 1812 158. Jori F, Godfroid J, Michel AL, Potts AD, Jaumally MR, Sauzier J, et al. An  
1813 assessment of zoonotic and production limiting pathogens in rusa deer (*Cervus*  
1814 *timorensis rusa*) from Mauritius. *Transbound Emerg Dis*. 2014;61 Suppl 1:31-42. doi:  
1815 10.1111/tbed.12206.
- 1816
- 1817 159. Elfving K, Shakely D, Andersson M, Baltzell K, Ali AS, Bachelard M, et al. Acute  
1818 uncomplicated febrile illness in children aged 2-59 months in Zanzibar - aetiologies,  
1819 antibiotic treatment and outcome. *PLoS One*. 2016;11(1):e0146054. Epub 2016/01/29.  
1820 doi: 10.1371/journal.pone.0146054.
- 1821
- 1822 160. Nicolas G, Durand B, Duboz R, Rakotondravao R, Chevalier V. Description and  
1823 analysis of the cattle trade network in the Madagascar highlands: potential role in the  
1824 diffusion of Rift Valley fever virus. *Acta Trop*. 2013;126(1):19-27. doi:  
1825 10.1016/j.actatropica.2012.12.013.
- 1826
- 1827 161. Abdo-Salem S, Tran A, Grosbois V, Gerbier G, Al-Qadasi M, Saeed K, et al. Can  
1828 environmental and socioeconomic factors explain the recent emergence of Rift Valley  
1829 fever in Yemen, 2000-2001? *Vector Borne Zoonotic Dis*. 2011;11(6):773-779. Epub  
1830 2011/02/03. doi: 10.1089/vbz.2010.0084.
- 1831
- 1832 162. Xiao Y, Beier JC, Cantrell RS, Cosner C, DeAngelis DL, Ruan S. Modelling the  
1833 effects of seasonality and socioeconomic impact on the transmission of Rift Valley fever  
1834 virus. *PLoS Negl Trop Dis*. 2015;9(1):e33388. Epub 2015/01/09. doi:  
1835 10.1371/journal.pntd.0003388.
- 1836

- 1837 163. Apolloni A, Nicolas G, Coste C, El Mamy AB, Yahya B, El Arbi AS, et al. Towards  
1838 the description of livestock mobility in Sahelian Africa: Some results from a survey in  
1839 Mauritania. PLoS One. 2018;13(1). doi: 10.1371/journal.pone.0191565.
- 1840  
1841 164. Bergren NA, Borland EM, Hartman DA, Kading RC. Laboratory demonstration of  
1842 the vertical transmission of Rift Valley fever virus by *Culex tarsalis* mosquitoes. PLoS  
1843 Negl Trop Dis. 2021;15(3):e0009273. doi: 10.1371/journal.pntd.0009273.
- 1844  
1845 165. Antonis AF, Kortekaas J, Kant J, Vloet RP, Vogel-Brink A, Stockhofe N, et al.  
1846 Vertical transmission of Rift Valley fever virus without detectable maternal viremia.  
1847 Vector Borne Zoonotic Dis. 2013;13(8):601-606. doi: 10.1089/vbz.2012.1160.
- 1848  
1849 166. Adam I, Karsany MS. Case report: Rift Valley fever with vertical transmission in a  
1850 pregnant Sudanese woman. J Med Virol. 2008;80(5):929. Epub 2008/03/25. doi:  
1851 10.1002/jmv.21132.
- 1852  
1853 167. Arishi HM, Aqeel AY, Al Hazmi MM. Vertical transmission of fatal Rift Valley fever  
1854 in a newborn. Ann Trop Paediatr. 2006;26(3):251-253. doi:  
1855 10.1179/146532806X120363.
- 1856  
1857 168. Baudin M, Jumaa AM, Jomma HJE, Karsany MS, Bucht G, Näslund J, et al.  
1858 Association of Rift Valley fever virus infection with miscarriage in Sudanese women: a  
1859 cross-sectional study. Lancet Glob Health. 2016;4(11):e864-e871. Epub 2016/10/22.  
1860 doi: 10.1016/s2214-109x(16)30176-0.
- 1861  
1862 169. Pienaar NJ, Thompson PN. Temporal and spatial history of Rift Valley fever in  
1863 South Africa: 1950 to 2011. Onderstepoort J Vet Res. 2013;80(1):384. Epub  
1864 2013/05/31. doi: 10.4102/ojvr.v80i1.384.
- 1865  
1866 170. Ndengu M, Matope G, Tivapasi M, Pfukenyi DM, Cetre-Sossah C, De Garine-  
1867 Wichtitsky M. Seroprevalence and associated risk factors of Rift Valley fever in cattle  
1868 and selected wildlife species at the livestock/wildlife interface areas of Gonarezhou  
1869 National Park, Zimbabwe. Onderstepoort J Vet Res. 2020;87(1):e1-e7. Epub  
1870 2020/05/07. doi: 10.4102/ojvr.v87i1.1731.
- 1871  
1872 171. Nyakarahuka L, de St Maurice A, Purpura L, Ervin E, Balinandi S, Tumusiime A, et  
1873 al. Prevalence and risk factors of Rift Valley fever in humans and animals from Kabale  
1874 district in Southwestern Uganda, 2016. PLoS Negl Trop Dis. 2018;12(5):e0006412.  
1875 Epub 2018/05/04. doi: 10.1371/journal.pntd.0006412.
- 1876

- 1877 172. FAO. Rift Valley fever vaccine development, progress and constraints.  
1878 Proceedings of the GF-TADs meeting, January 2011. Rome, Italy: 2011.
- 1879  
1880 173. Bird BH, Nichol ST. Breaking the chain: Rift Valley fever virus control via livestock  
1881 vaccination. *Curr Opin Virol.* 2012;2(3):315-323. Epub 2012/04/03. doi:  
1882 10.1016/j.coviro.2012.02.017.
- 1883  
1884 174. Shoemaker TR, Nyakarahuka L, Balinandi S, Ojwang J, Tumusiime A, Mulei S, et  
1885 al. First laboratory-confirmed outbreak of human and animal Rift Valley fever virus in  
1886 Uganda in 48 years. *Am J Trop Med Hyg.* 2019;100(3):659-671. Epub 2019/01/25. doi:  
1887 10.4269/ajtmh.18-0732.
- 1888  
1889 175. Archer BN, Weyer J, Paweska J, Nkosi D, Leman P, Tint KS, et al. Outbreak of  
1890 Rift Valley fever affecting veterinarians and farmers in South Africa, 2008. *S Afr Med J.*  
1891 2011;101(4):263-266. Epub 2011/07/27. doi: 10.7196/samj.4544.
- 1892  
1893 176. Tambo E, Olalubi OA, Sacko M. Rift Valley fever epidemic in Niger near border  
1894 with Mali. *Lancet Infectious Diseases.* 2016;16(12):1319-1320. doi: 10.1016/S1473-  
1895 3099(16)30477-7.
- 1896  
1897 177. Davies FG. Risk of a Rift Valley fever epidemic at the Hajj in Mecca, Saudi Arabia.  
1898 *Rev Sci Tech.* 2006;25(1):137-147. doi: 10.20506/rst.25.1.1648.
- 1899  
1900 178. Krystosik A, Njoroge G, Odhiambo L, Forsyth JE, Mutuku F, LaBeaud AD. Solid  
1901 wastes provide breeding sites, burrows, and food for biological disease vectors, and  
1902 urban zoonotic reservoirs: A call to action for solutions-based research. *Front Public*  
1903 *Health.* 2019;7:405. doi: 10.3389/fpubh.2019.00405.
- 1904  
1905 179. Salmon-Rousseau A, Piednoir E, Cattoir V, de La Blanchardiere A. Hajj-associated  
1906 infections. *Medecine et Maladies Infectieuses.* 2016.
- 1907  
1908 180. Cecilia H, Métras R, Fall AG, Lo MM, Lancelot R, Ezanno P. It's risky to wander in  
1909 September: Modelling the epidemic potential of Rift Valley fever in a Sahelian setting.  
1910 *Epidemics.* 2020;33:100409. Epub 2020/11/03. doi: 10.1016/j.epidem.2020.100409.
- 1911  
1912 181. Obiero JPO, Onyando JO. Climate. Chapter 5 *in* *Developments in Earth Surface*  
1913 *Processes.* 16 2013. p. 39-50.
- 1914

- 1915 182. Alhaji NB, Aminu J, Lawan MK, Babalobi OO, Ghali-Mohammed I, Odetokun IA.  
1916 Seropositivity and associated intrinsic and extrinsic factors for Rift Valley fever virus  
1917 occurrence in pastoral herds of Nigeria: a cross sectional survey. BMC Vet Res.  
1918 2020;16(1):243. Epub 2020/07/16. doi: 10.1186/s12917-020-02455-8.
- 1919  
1920 183. Durand B, Lo Modou M, Tran A, Ba A, Sow F, Belkhiria J, et al. Rift Valley fever in  
1921 northern Senegal: A modelling approach to analyse the processes underlying virus  
1922 circulation recurrence. Plos Neglected Tropical Diseases. 2020;14(6). doi:  
1923 10.1371/journal.pntd.0008009.
- 1924  
1925 184. Kakani S, LaBeaud AD, King CH. Planning for Rift Valley fever virus: use of  
1926 geographical information systems to estimate the human health threat of white-tailed  
1927 deer (*Odocoileus virginianus*)-related transmission. Geospat Health. 2010;5(1):33-43.  
1928 doi: 10.4081/gh.2010.185.
- 1929  
1930 185. Wilson WC, Kim IJ, Trujillo JD, Sunwoo SY, Noronha LE, Urbaniak K, et al.  
1931 Susceptibility of white-tailed deer to Rift Valley fever virus. Emerg Infect Dis.  
1932 2018;24(9):1717-1719. Epub 2018/08/21. doi: 10.3201/eid2409.180265.
- 1933  
1934 186. Bron GM, Strimbu K, Cecilia H, Lerch A, Moore SM, Tran Q, et al. Over 100 Years  
1935 of Rift Valley fever: A patchwork of data on pathogen spread and spillover. Pathogens.  
1936 2021;10(6). doi: 10.3390/pathogens10060708.
- 1937  
1938 187. Schwarz NG, Girmann M, Randriamampionona N, Bialonski A, Maus D, Krefis AC,  
1939 et al. Seroprevalence of antibodies against chikungunya, dengue, and Rift Valley fever  
1940 viruses after febrile illness outbreak, Madagascar. Emerg Infect Dis. 2012;18(11):1780-  
1941 1786. doi: 10.3201/eid1811.111036.
- 1942  
1943 188. Al-Qabati AG, Al-Afaleq AI. Cross-sectional, longitudinal and prospective  
1944 epidemiological studies of Rift Valley fever in Al-Hasa Oasis, Saudi Arabia. Journal of  
1945 Animal and Veterinary Advances. 2010;9(2):258-265.
- 1946  
1947 189. Grossi-Soyster EN, Lee J, King CH, LaBeaud AD. The influence of raw milk  
1948 exposures on Rift Valley fever virus transmission. PLoS Negl Trop Dis.  
1949 2019;13(3):e0007258. doi: 10.1371/journal.pntd.0007258.
- 1950  
1951 190. Cook EAJ, de Glanville WA, Thomas LF, Kariuki S, Bronsvort B, Fevre EM.  
1952 Working conditions and public health risks in slaughterhouses in western Kenya. BMC  
1953 Public Health. 2017;17. doi: 10.1186/s12889-016-3923-y.
- 1954

- 1955 191. Ikegami T, Balogh A, Nishiyama S, Lokugamage N, Saito TB, Morrill JC, et al.  
1956 Distinct virulence of Rift Valley fever phlebovirus strains from different genetic lineages  
1957 in a mouse model. *PLoS One*. 2017;12(12):e0189250. Epub 2017/12/22. doi:  
1958 10.1371/journal.pone.0189250.
- 1959  
1960 192. WHO. Factors that contributed to undetected spread of the Ebola virus and  
1961 impeded rapid containment. Geneva, Switzerland: World Health Organization; 2015  
1962 [cited 2021 9/7/2021].
- 1963  
1964 193. de St Maurice A, Nyakarahuka L, Purpura L, Ervin E, Tumusiime A, Balinandi S, et  
1965 al. Notes from the field: Rift Valley fever response - Kabale District, Uganda, March  
1966 2016. *MMWR Morb Mortal Wkly Rep*. 2016;65(43):1200-1201. Epub 2016/11/05. doi:  
1967 10.15585/mmwr.mm6543a5.
- 1968  
1969 194. Hartley DM, Rinderknecht JL, Nipp TL, Clarke NP, Snowden GD, National Center  
1970 for Foreign Animal Zoonotic Disease Defense Advisory Group on Rift Valley Fever.  
1971 Potential effects of Rift Valley fever in the United States. *Emerg Infect Dis*.  
1972 2011;17(8):e1. doi: 10.3201/eid1708.101088.
- 1973  
1974 195. Brugere-Picoux J, Chomel B. Importation of tropical diseases to Europe via  
1975 animals and animal products: risks and pathways. *Bulletin de L Academie Nationale de*  
1976 *Medecine*. 2009;193(8):1805-1819. doi: 10.1016/S0001-4079(19)32415-X.
- 1977  
1978 196. Cito F, Narcisi V, Danzetta ML, Iannetti S, Sabatino DD, Bruno R, et al. Analysis of  
1979 surveillance systems in place in European Mediterranean countries for West Nile virus  
1980 (WNV) and Rift Valley fever (RVF). *Transbound Emerg Dis*. 2013;60 Suppl 2:40-44.  
1981 Epub 2014/03/05. doi: 10.1111/tbed.12124.
- 1982  
1983 197. Nielsen SS, Alvarez J, Bicout DJ, Calistri P, Depner K, Drewe JA, et al. Rift Valley  
1984 fever - epidemiological update and risk of introduction into Europe. *EFSAJ*.  
1985 2020;18(3):e06041. Epub 2020/10/07. doi: 10.2903/j.efsa.2020.6041.
- 1986  
1987 198. Rolin AI, Berrang-Ford L, Kulkarni MA. The risk of Rift Valley fever virus  
1988 introduction and establishment in the United States and European Union. *Emerg*  
1989 *Microbes Infect*. 2013;2(12):e81. Epub 2013/12/01. doi: 10.1038/emi.2013.81.
- 1990  
1991 199. Zeller H, Marrama L, Sudre B, Van Bortel W, Warns-Petit E. Mosquito-borne  
1992 disease surveillance by the European Centre for Disease Prevention and Control. *Clin*  
1993 *Microbiol Infect*. 2013;19(8):693-698. Epub 2013/04/24. doi: 10.1111/1469-0691.12230.
- 1994

- 1995 200. Lagerqvist N, Moiane B, Mapaco L, Fafetine J, Vene S, Falk KI. Antibodies against  
1996 Rift Valley fever virus in cattle, Mozambique. *Emerg Infect Dis.* 2013;19(7):1177-1179.  
1997 Epub 2013/06/15. doi: 10.3201/eid1907.130332.
- 1998  
1999 201. Abakar MF, Nare NB, Schelling E, Hattendorf J, Alfaroukh IO, Zinsstag J.  
2000 Seroprevalence of Rift Valley fever, Q Fever, and brucellosis in ruminants on the  
2001 southeastern shore of Lake Chad. *Vector-Borne and Zoonotic Diseases.*  
2002 2014;14(10):757-762. doi: 10.1089/vbz.2014.1585.
- 2003  
2004 202. Consultative Group for RVF Decision Support. Decision-support tool for prevention  
2005 and control of Rift Valley fever epizootics in the Greater Horn of Africa. *Am J Trop Med*  
2006 *Hyg.* 2010;83(2 Suppl):75-85. doi: 10.4269/ajtmh.2010.83s2a03.
- 2007  
2008 203. Shah MM, Ndenga BA, Mutuku FM, Vu DM, Grossi-Soyster EN, Okuta V, et al.  
2009 High dengue burden and circulation of 4 virus serotypes among children with  
2010 undifferentiated fever, Kenya, 2014-2017. *Emerg Infect Dis.* 2020;26(11):2638-2650.  
2011 doi: 10.3201/eid2611.200960.
- 2012  
2013 204. Vu DM, Mutai N, Heath CJ, Vulule JM, Mutuku FM, Ndenga BA, et al.  
2014 Unrecognized dengue virus infections in children, western Kenya, 2014-2015. *Emerg*  
2015 *Infect Dis.* 2017;23(11):1915-1917. doi: 10.3201/eid2311.170807.
- 2016  
2017 205. Hortion J, Mutuku FM, Eyherabide AL, Vu DM, Boothroyd DB, Grossi-Soyster EN,  
2018 et al. Acute flavivirus and alphavirus infections among children in two different areas of  
2019 Kenya, 2015. *Am J Trop Med Hyg.* 2019;100(1):170-173. doi: 10.4269/ajtmh.18-0297.
- 2020  
2021 206. Hertz JT, Munishi OM, Ooi EE, Howe S, Lim WY, Chow A, et al. Chikungunya and  
2022 dengue fever among hospitalized febrile patients in northern Tanzania. *Am J Trop Med*  
2023 *Hyg.* 2012;86(1):171-177. doi: 10.4269/ajtmh.2012.11-0393.
- 2024  
2025 207. Pepin M, Bouloy M, Bird BH, Kemp A, Paweska J. Rift Valley fever virus  
2026 (Bunyaviridae: Phlebovirus): an update on pathogenesis, molecular epidemiology,  
2027 vectors, diagnostics and prevention. *Vet Res.* 2010;41(6):61. Epub 2010/12/29. doi:  
2028 10.1051/vetres/2010033.
- 2029  
2030 208. Fakour S, Naserabadi S, Ahmadi E. The first positive serological study on Rift  
2031 Valley fever in ruminants of Iran. *J Vector Borne Dis.* 2017;54(4):348-352. Epub  
2032 2018/02/21. doi: 10.4103/0972-9062.225840.
- 2033

2034 209. Amato L, Dente MG, Calistri P, Declich S. Integrated early warning surveillance:  
2035 Achilles' Heel of One Health? *Microorganisms*. 2020;8(1). doi:  
2036 10.3390/microorganisms8010084.

2037  
2038 210. Hassan OA, Ahlm C, Evander M. A need for One Health approach - lessons  
2039 learned from outbreaks of Rift Valley fever in Saudi Arabia and Sudan. *Infect Ecol*  
2040 *Epidemiol*. 2014;4. Epub 2014/02/08. doi: 10.3402/iee.v4.20710.

2041

## 2042 **Supporting Information**

### 2043 ***Text:***

2044 **S1 Text.** Information sources and detailed scripts used in running the searches on the  
2045 online databases

### 2046 ***Figures:***

2047 **S1 Figure.** Forest Plot for meta-analysis of the impact of butchering on odds of RVFV  
2048 exposure

2049 **S2 Figure.** Forest Plot for meta-analysis of the impact of sheltering animals on odds of  
2050 RVFV exposure

2051 **S3 Figure.** Forest Plot for meta-analysis of the impact of milking animals on odds of  
2052 RVFV exposure

### 2053 ***Tables:***

2054 **S1 Table.** PRISMA checklist

2055 **S2 Table.** Listing of included studies with full citations

2056 **S3 Table.** Listing of excluded studies with full citations

2057 **S4 Table.** Listing by year of countries experiencing human or animal exposure to RVFV  
2058 during 1999-2021

2059 **S5 Table.** Listing of acute human cases reported during 1999-2021. Outbreaks are  
2060 indicated by year, country, region, and geographic location, with estimated population  
2061 size, incidence, and case fatality rates

2062 **S6 Table.** Studies of RVFV lineage distribution based on genetic sequence analysis

2063 **S7 Table.** 1999-2021 studies of local insect vector presence and RVFV infection

2064 **S8 Table.** Studies assessing human risk factors related to animal exposures and severe  
2065 RVFV disease

2066 **S9 Table.** Studies of the effects of socioeconomic status on human RVFV exposure risk

2067 **S10 Table.** Studies of the effects of occupation on human RVFV exposure risk

2068 **S11 Table.** Livestock factors related to animal RVFV exposure risk

2069 **S12 Table.** Wildlife anti-RVFV seroprevalence reported in included studies

2070 **S13 Table.** Local and national RVF surveillance systems reported in included studies

2071



Identification of RVF occurrences via publication databases and registers

Identification of RVF occurrences via other methods

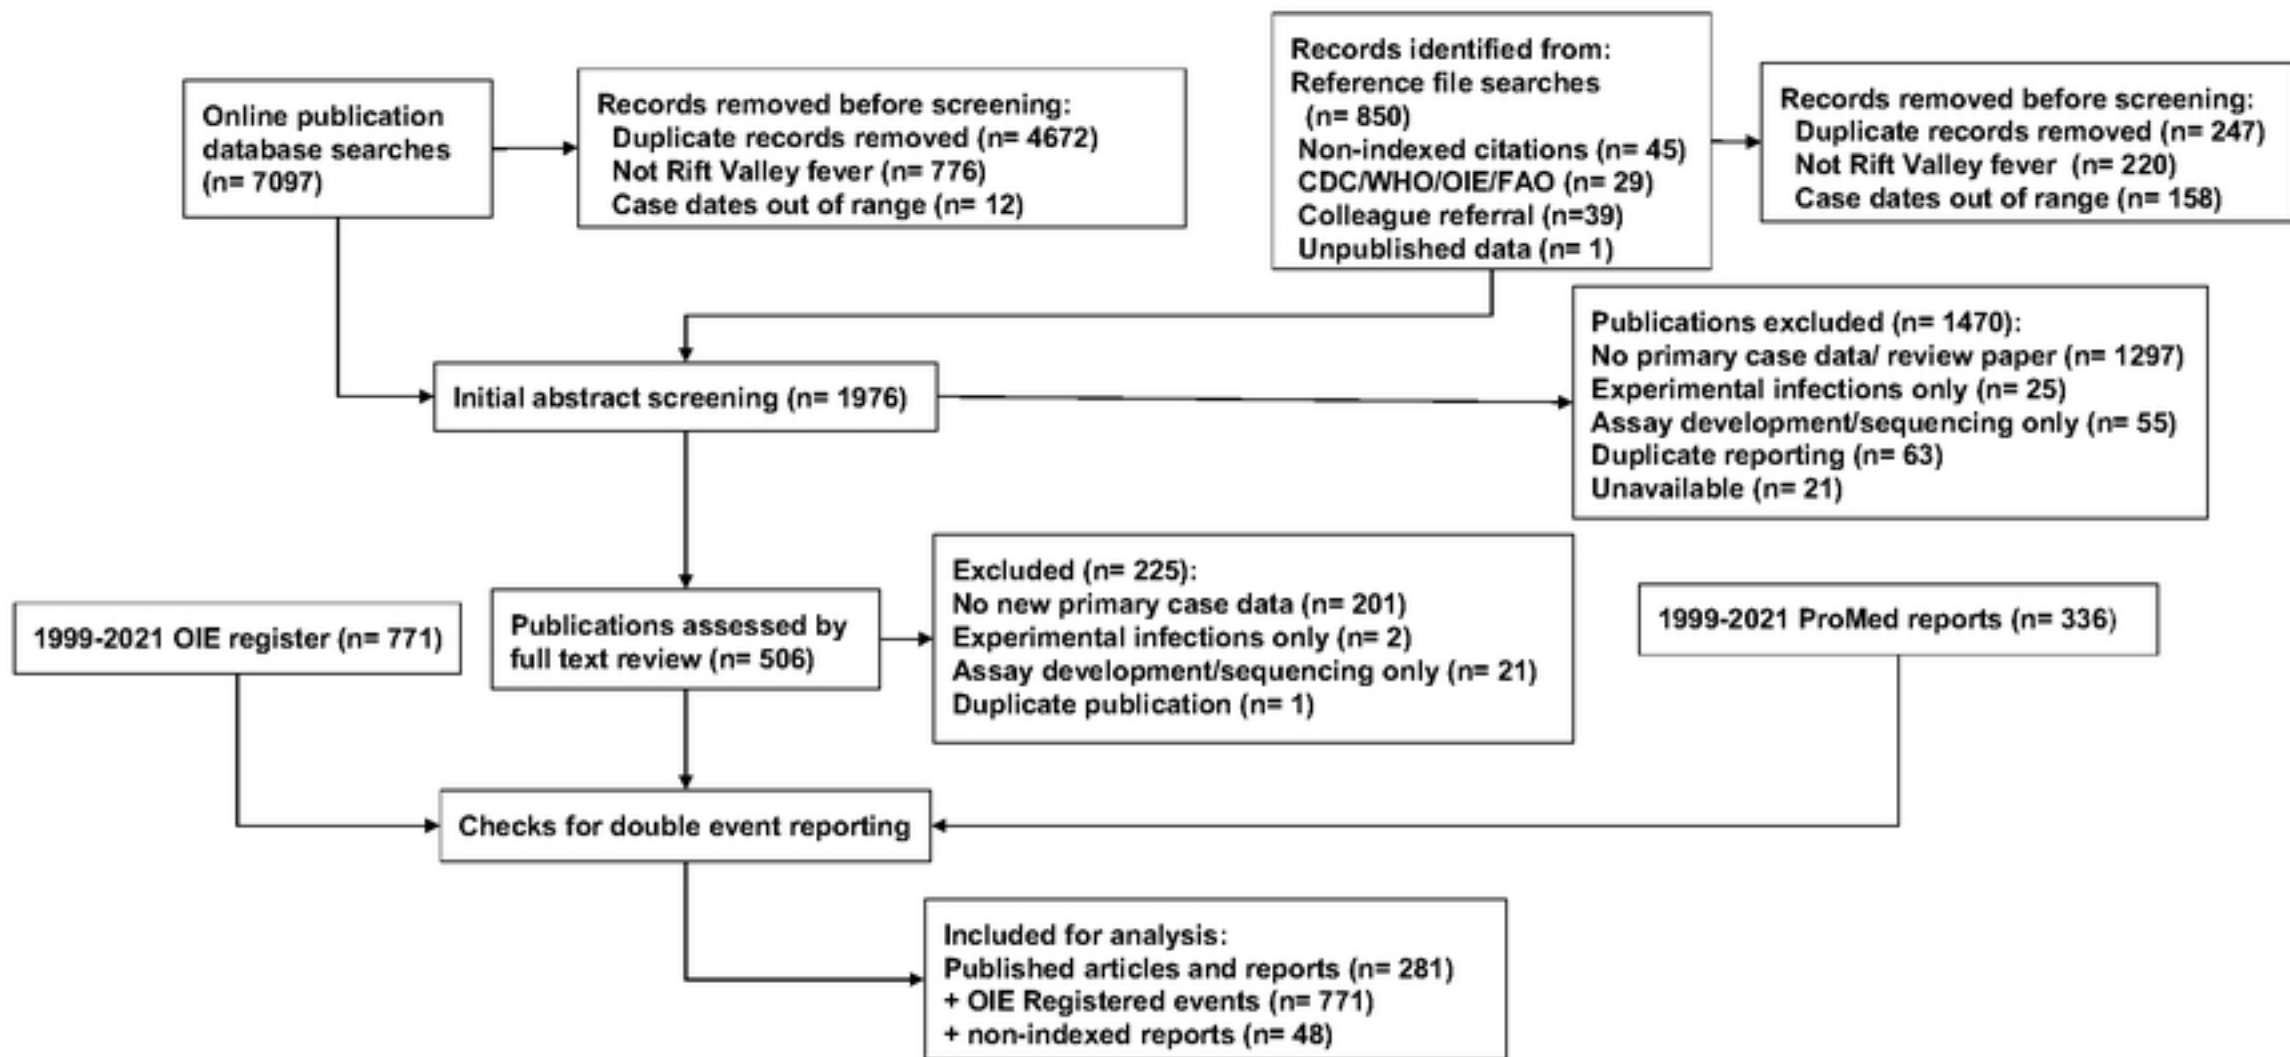

Figure 1

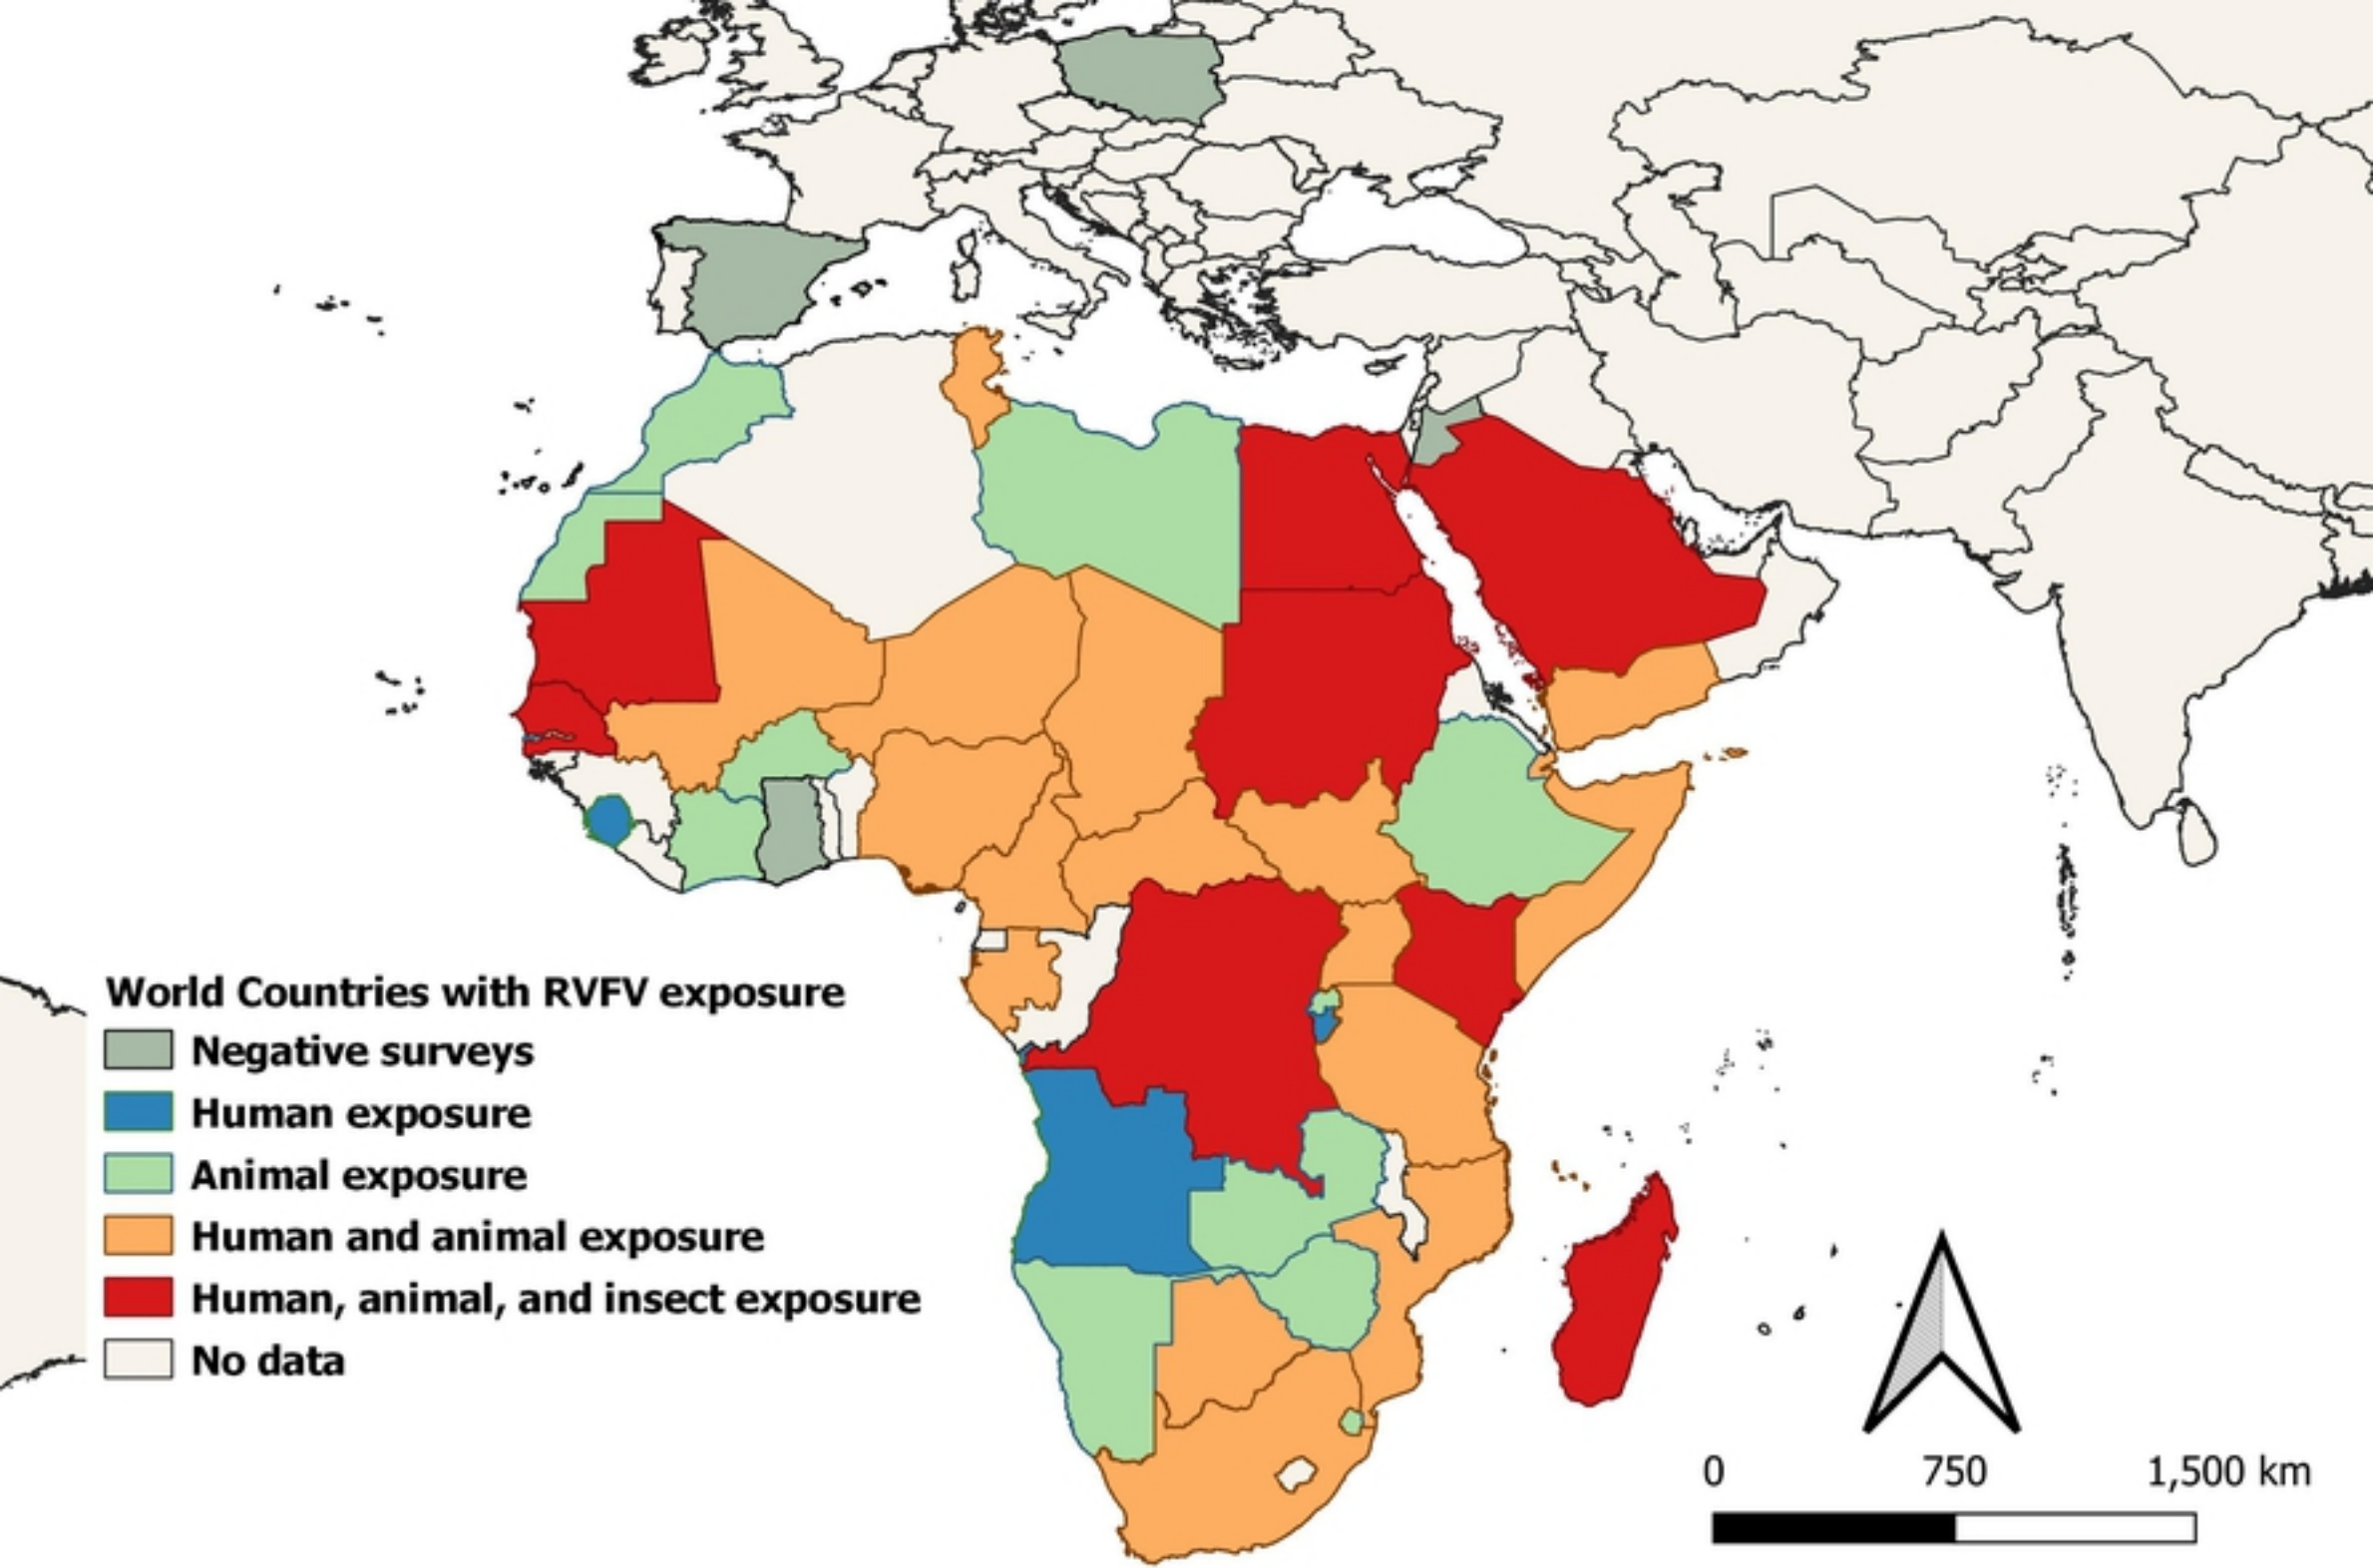

Figure 2

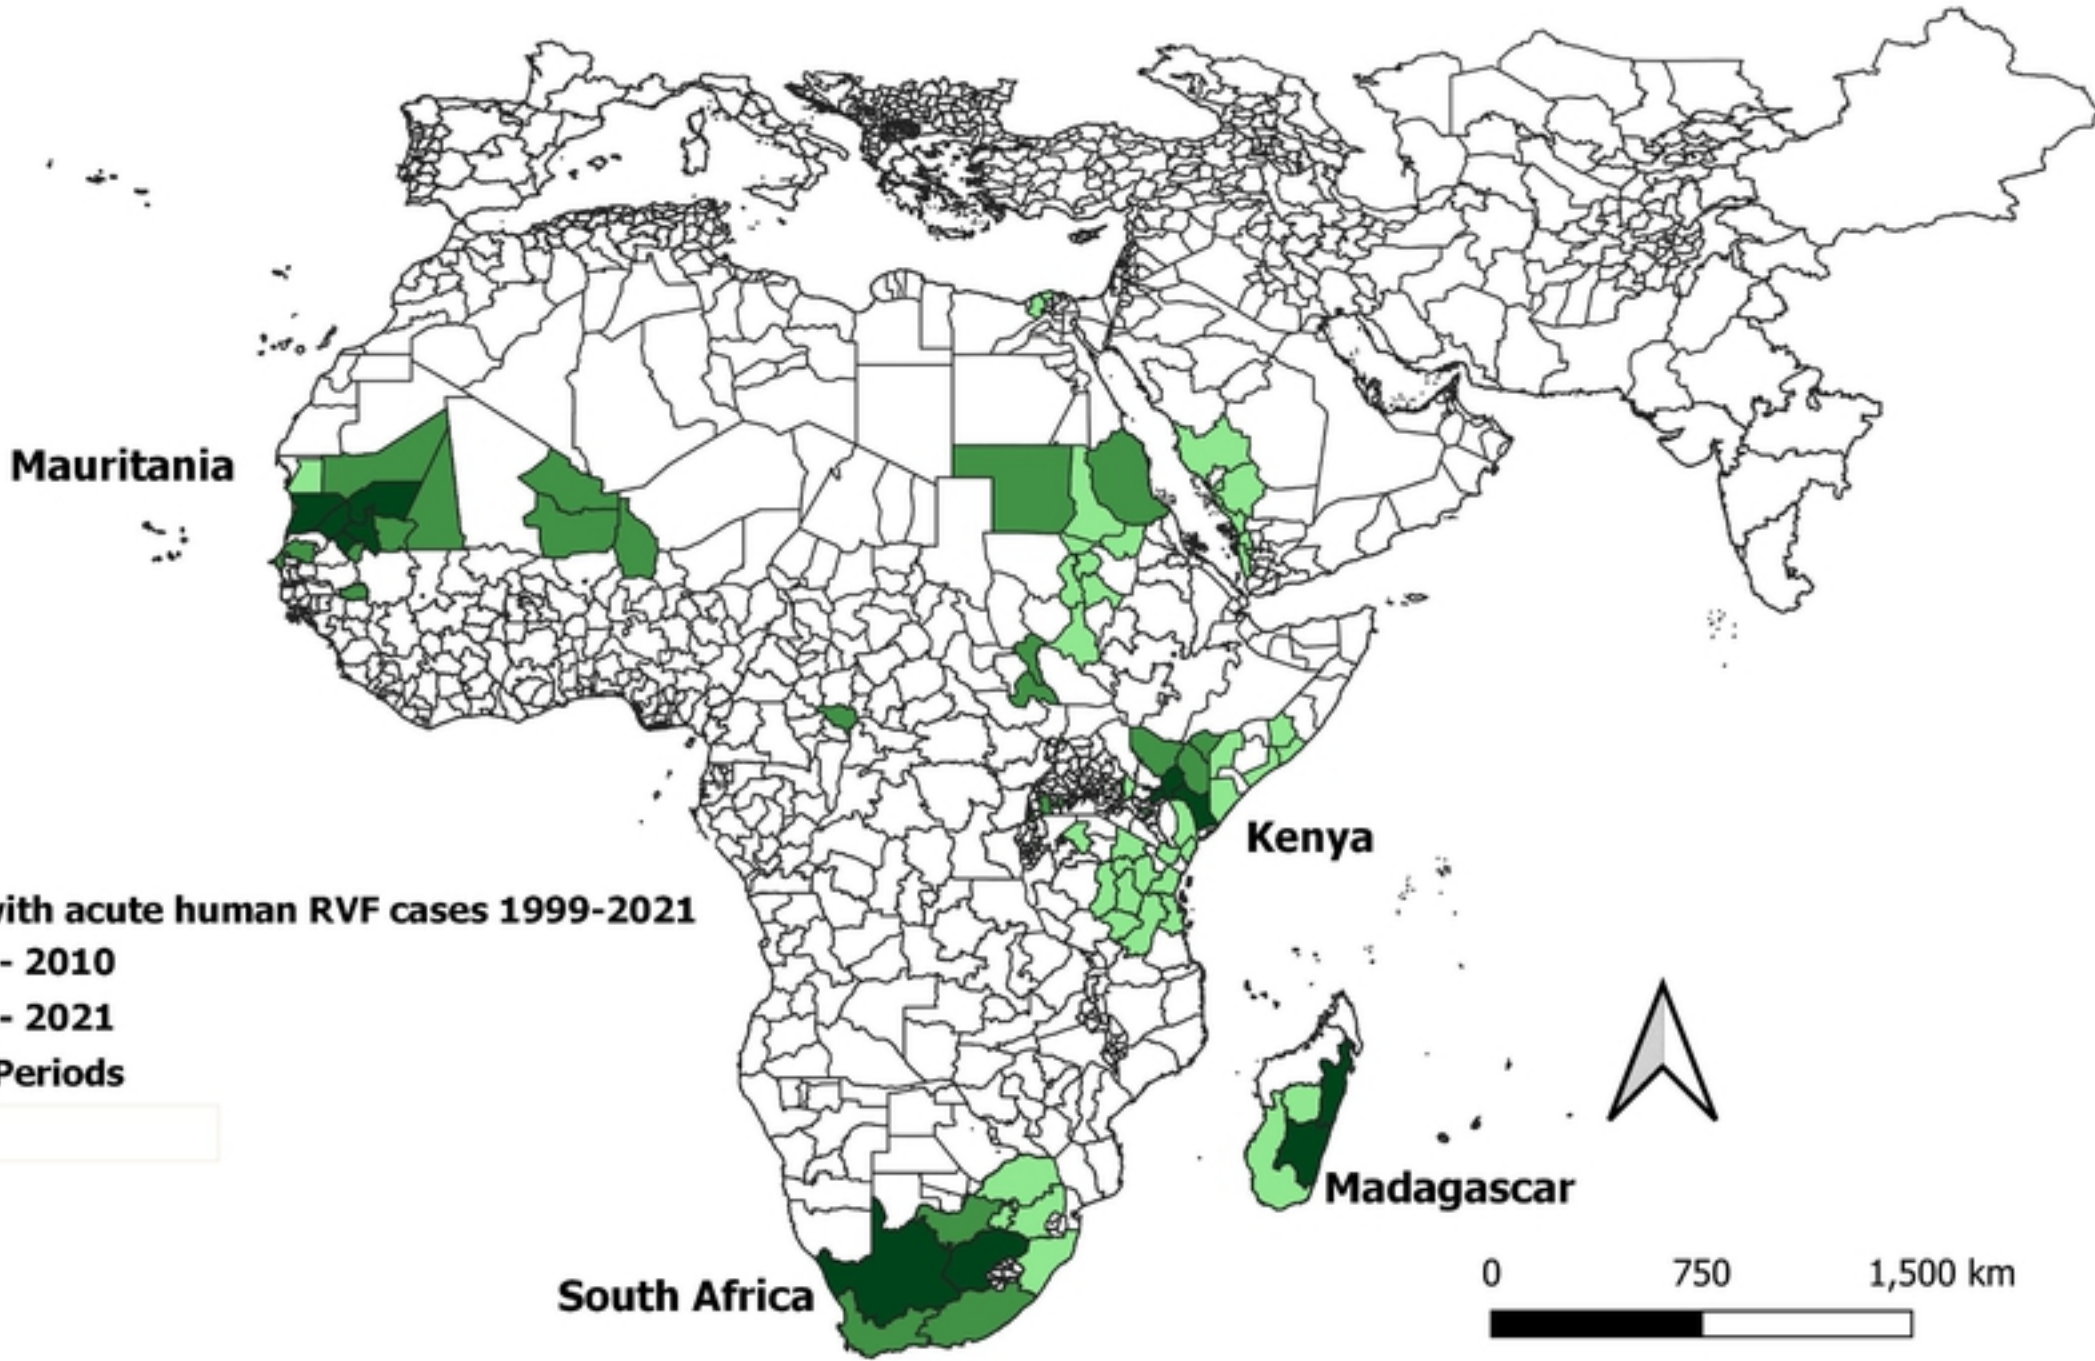

Figure 3

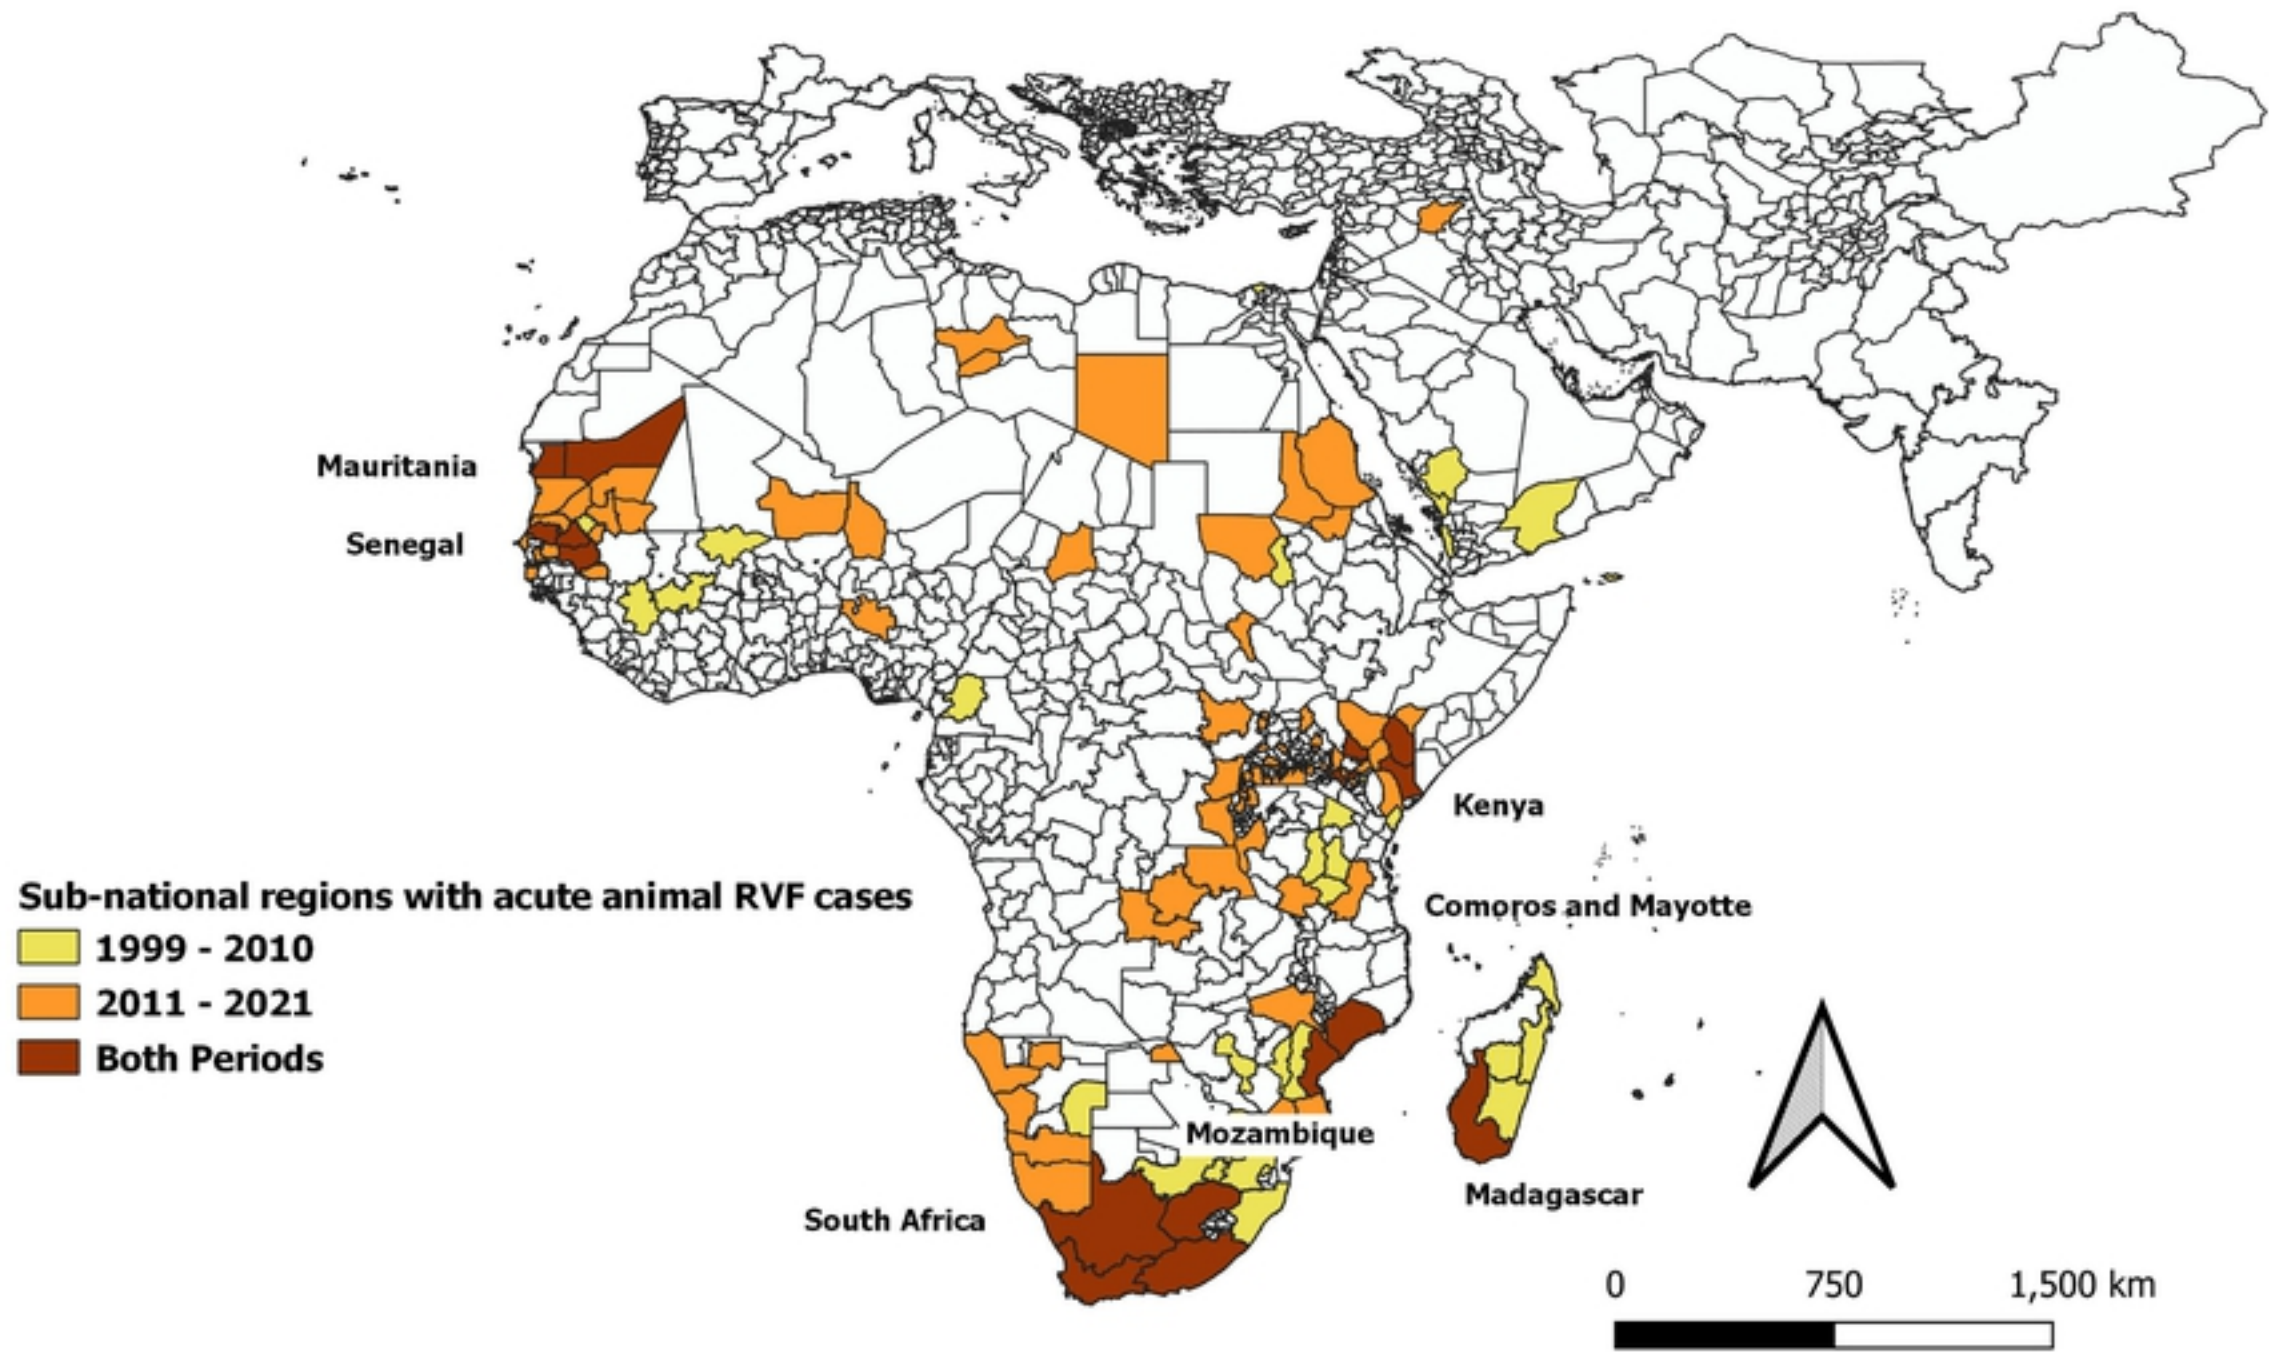

Figure 4

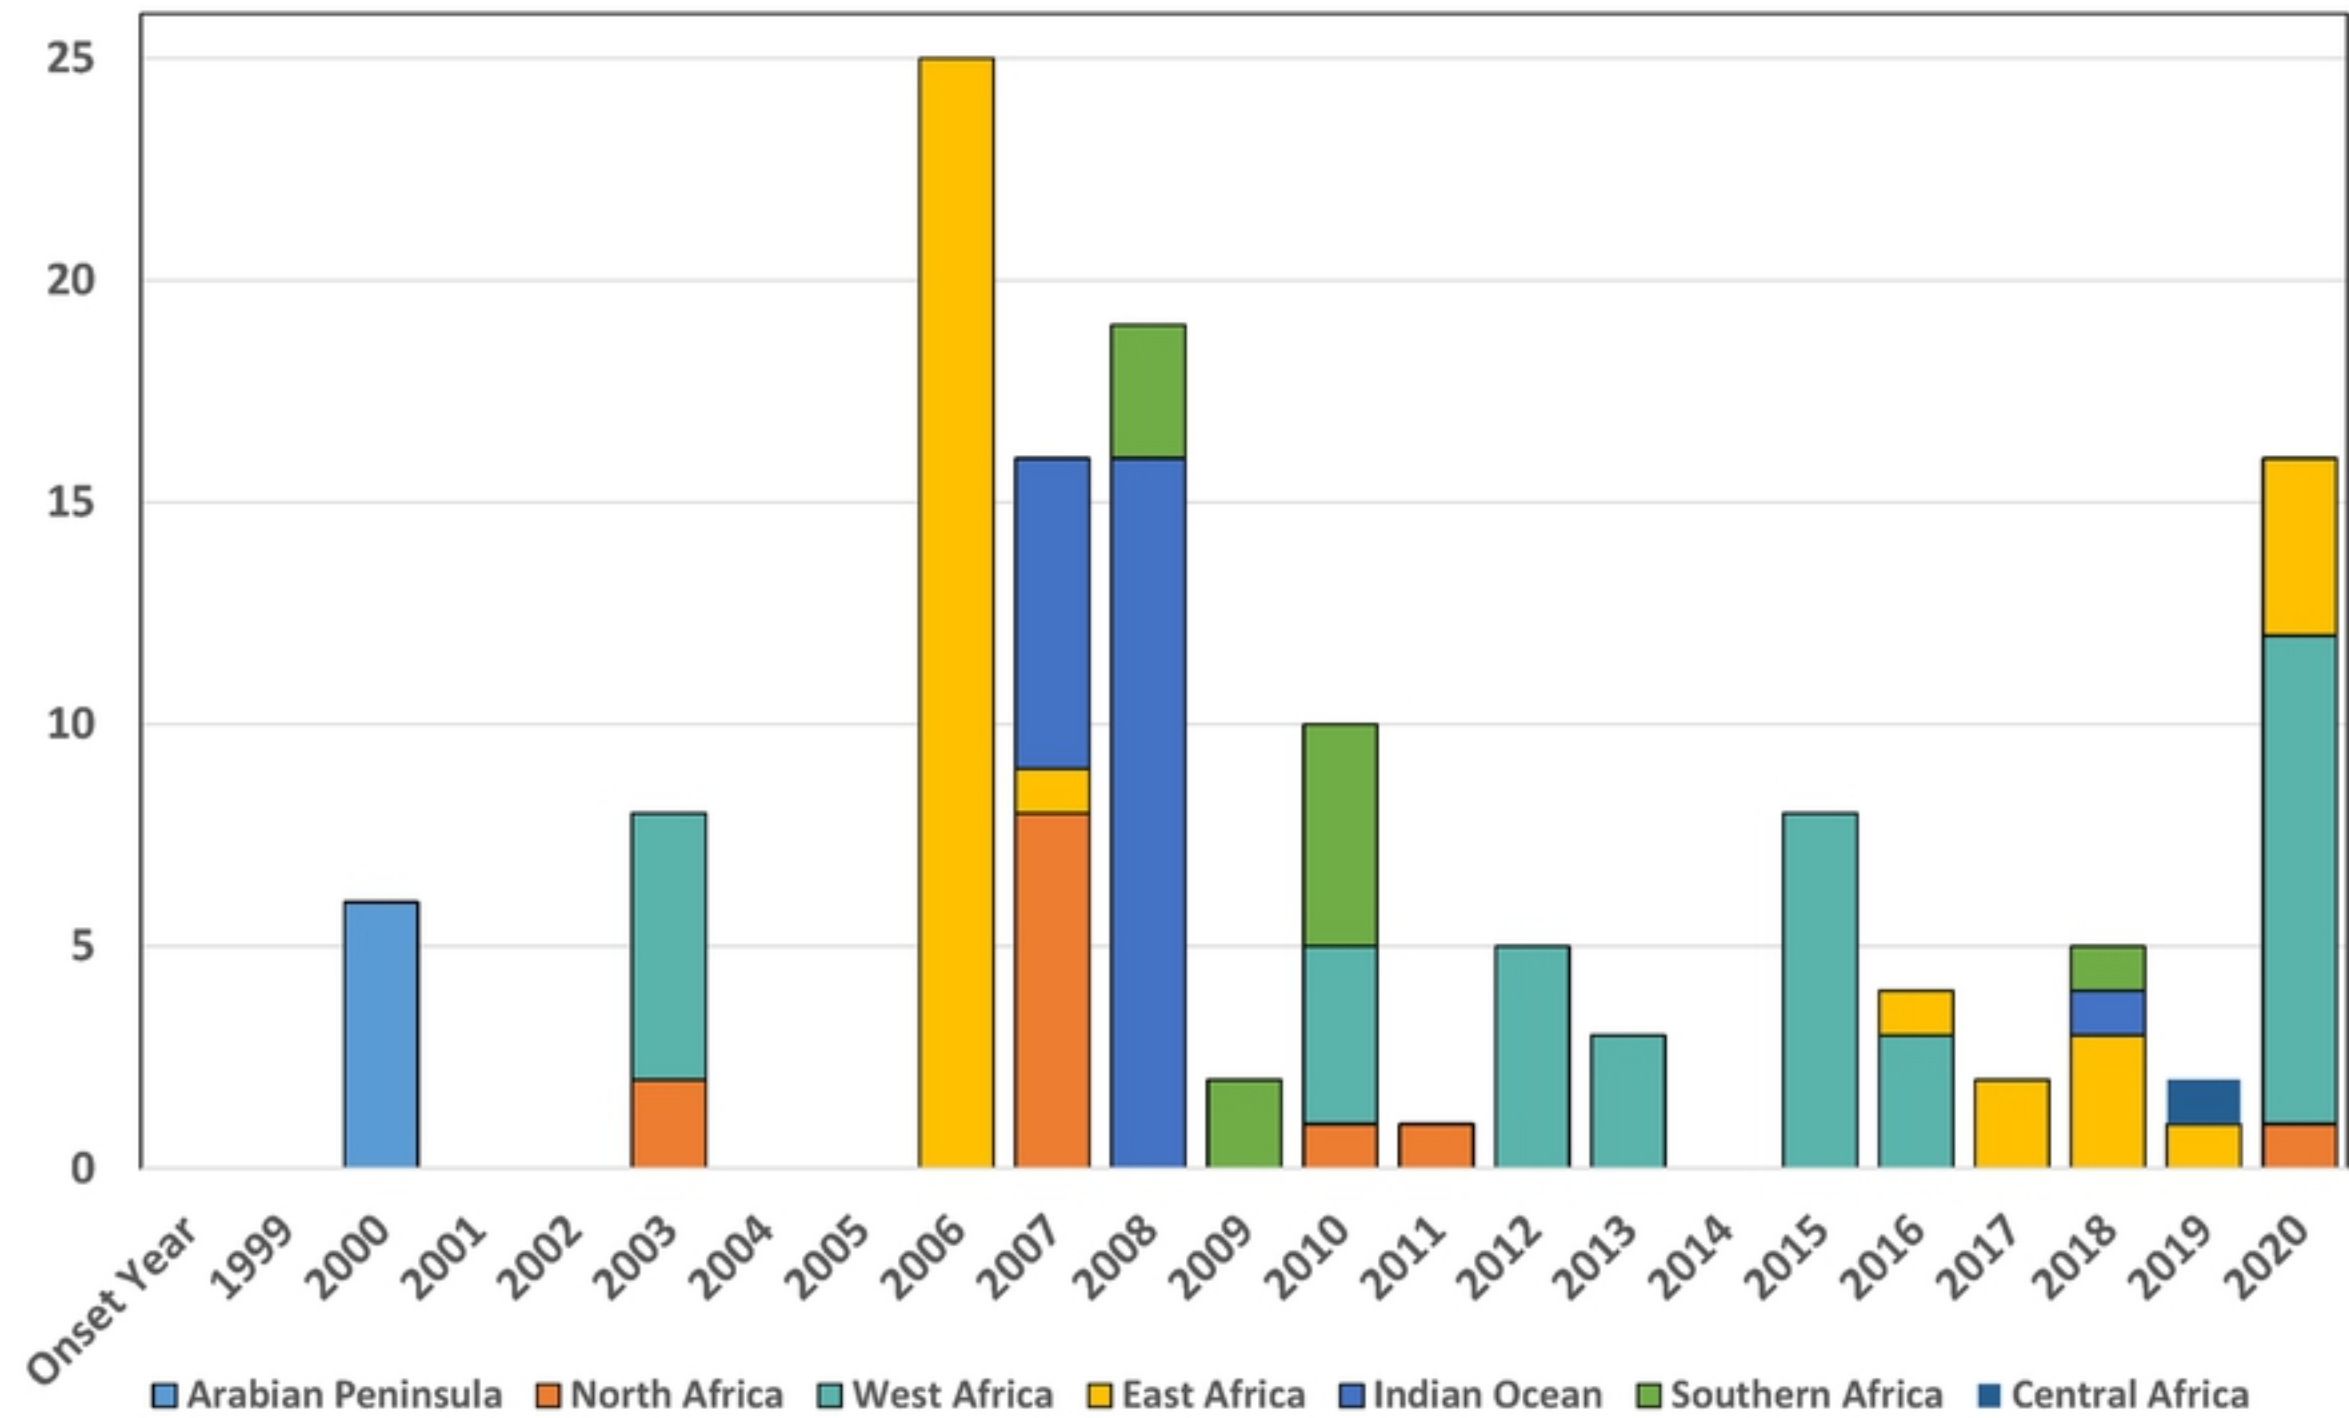

Figure 5

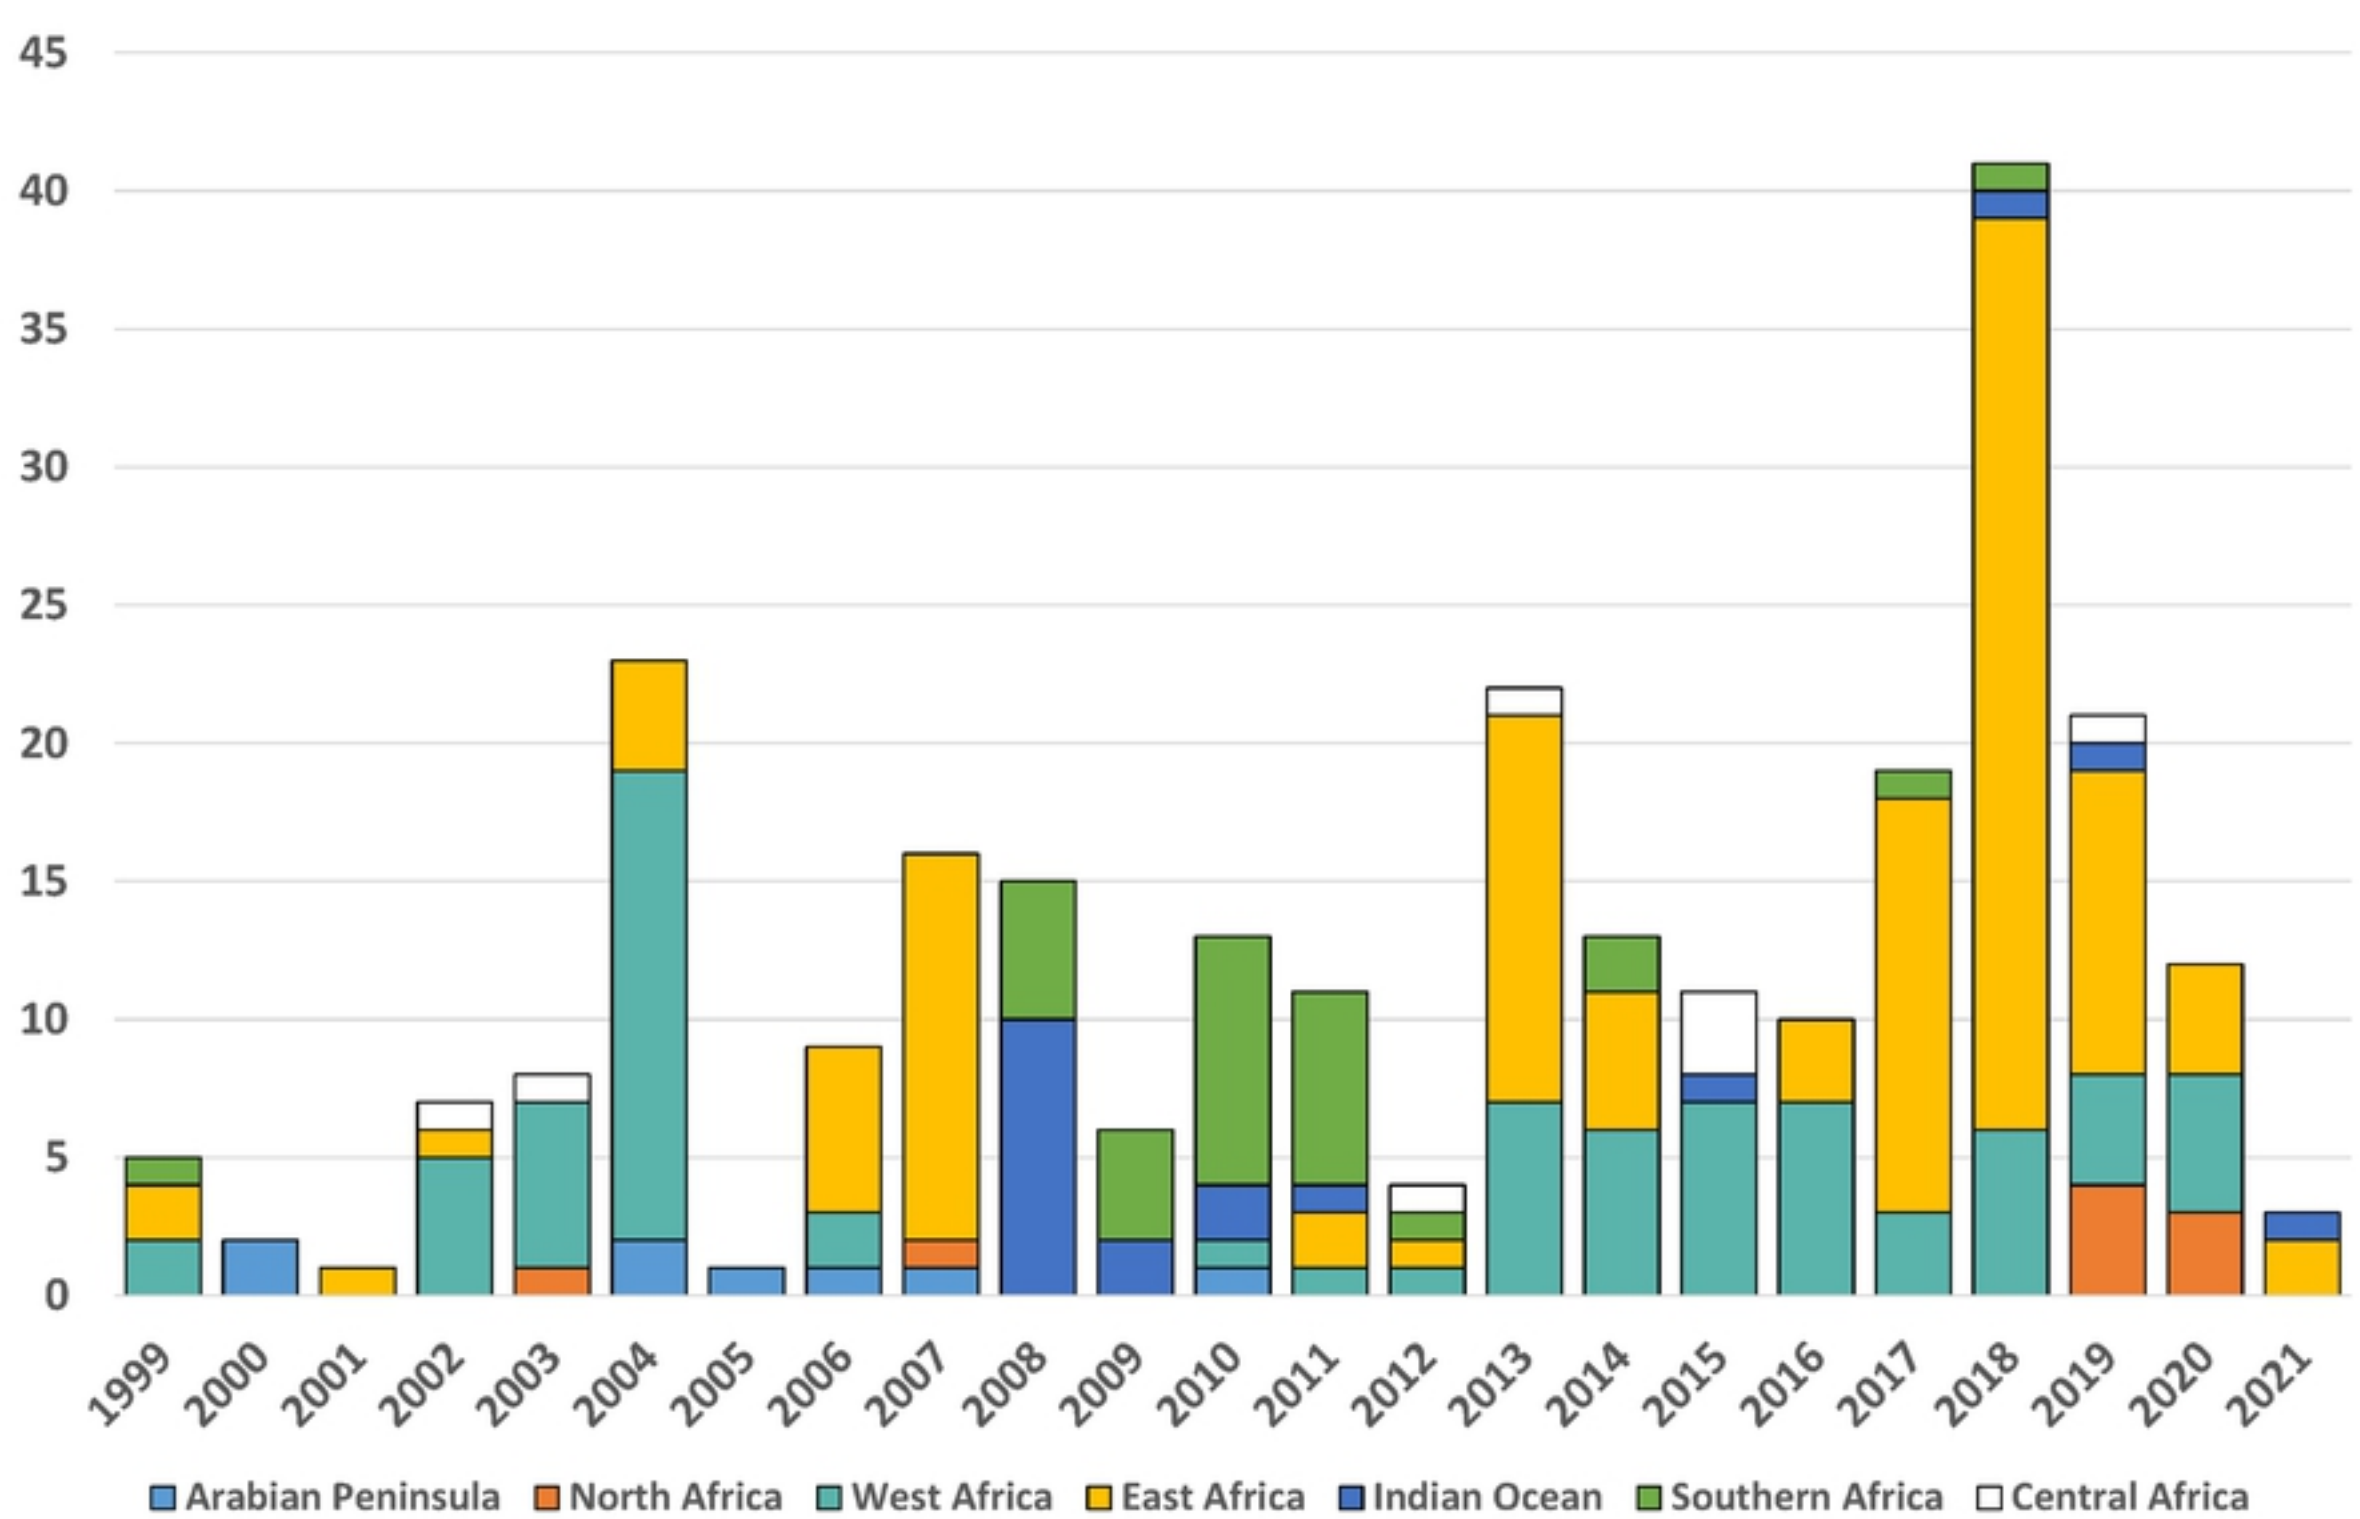

Figure 6

| Study name                        | Period       | Time Interval | Statistics for each study |              |              |              |
|-----------------------------------|--------------|---------------|---------------------------|--------------|--------------|--------------|
|                                   |              |               | Odds ratio                | Lower limit  | Upper limit  | p-Value      |
| Sanderson (2020)                  | IEP          | 1985-2019     | 1.864                     | 1.073        | 3.236        | 0.027        |
| Marrama (2005)                    | IEP          | 1999          | 1.130                     | 0.717        | 1.778        | 0.599        |
| Swai (2009)                       | IEP          | 2004          | 3.675                     | 0.445        | 30.373       | 0.227        |
| Porrut (2010)                     | IEP          | 2005-2008     | 1.768                     | 1.260        | 2.481        | 0.001        |
| LaBeaud (2008)                    | IEP          | 2006          | 2.428                     | 1.130        | 5.219        | 0.023        |
| Muiruri (2015)                    | IEP          | 2006          | 2.643                     | 1.252        | 5.578        | 0.011        |
| Anyangu (2010)                    | Outbreak     | 2006-2007     | 1.424                     | 1.036        | 1.958        | 0.030        |
| Aradib (2013)                     | Outbreak     | 2007          | 1.378                     | 0.724        | 2.623        | 0.329        |
| Hassanian (2010)                  | Outbreak     | 2007          | 2.760                     | 1.177        | 6.470        | 0.020        |
| Ochieng (2015)                    | Postepidemic | 2007          | 1.283                     | 0.751        | 2.192        | 0.362        |
| Al-Azraqi (2012)                  | IEP          | 2007-2008     | 0.949                     | 0.647        | 1.390        | 0.787        |
| Heinrich (2012)                   | IEP          | 2007-2008     | 1.000                     | 0.608        | 1.645        | 1.000        |
| LaBeaud (2011)                    | IEP          | 2009          | 2.324                     | 1.173        | 4.603        | 0.016        |
| Byomi (2015)                      | IEP          | 2009-2010     | 1.379                     | 0.717        | 2.650        | 0.335        |
| Grossi-Soyster (2017)             | IEP          | 2009-2011     | 0.808                     | 0.436        | 1.499        | 0.499        |
| Tigoi (2015)                      | IEP          | 2009-2012     | 0.720                     | 0.417        | 1.242        | 0.238        |
| Andayi (2014)                     | IEP          | 2010-2011     | 1.170                     | 0.483        | 2.833        | 0.727        |
| Cook (2017)                       | IEP          | 2010-2012     | 0.452                     | 0.147        | 1.384        | 0.164        |
| Nakoune (2016)                    | IEP          | 2010-2012     | 1.866                     | 0.704        | 4.945        | 0.210        |
| LaBeaud (2015)                    | IEP          | 2011          | 1.463                     | 1.048        | 2.043        | 0.026        |
| Lernout (2013)                    | IEP          | 2011          | 1.453                     | 0.822        | 2.566        | 0.198        |
| Gray (2015)                       | IEP          | 2012          | 0.985                     | 0.531        | 1.828        | 0.962        |
| Sumnaye (2015)                    | IEP          | 2012          | 1.260                     | 0.767        | 2.071        | 0.361        |
| Gudo (2016)                       | Outbreak     | 2013          | 1.531                     | 0.605        | 3.875        | 0.369        |
| Bett (2019)                       | IEP          | 2013-2014     | 1.520                     | 1.008        | 2.291        | 0.046        |
| Ahmed (2018)                      | IEP          | 2014          | 1.432                     | 0.719        | 2.851        | 0.307        |
| Tigoi (2020)                      | IEP          | 2014-2015     | 1.670                     | 1.168        | 2.387        | 0.005        |
| Nyakarahuka (2018)                | Outbreak     | 2016          | 2.705                     | 1.511        | 4.843        | 0.001        |
| <b>Pooled OR (random effects)</b> |              |               | <b>1.410</b>              | <b>1.240</b> | <b>1.604</b> | <b>0.000</b> |

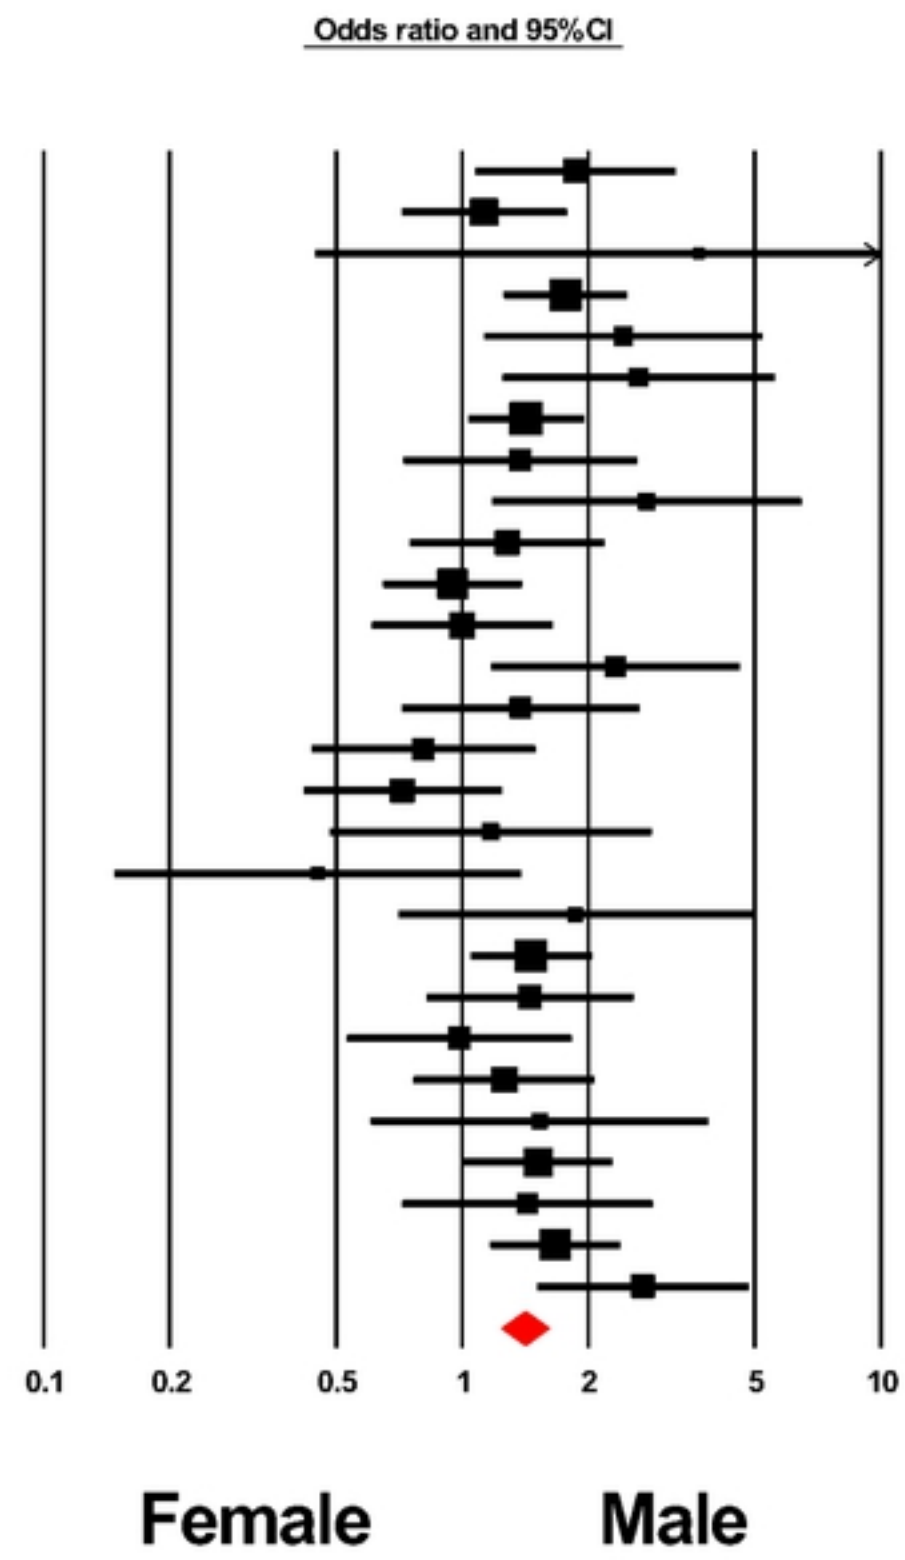

Figure 7

| Study name                        | Period   | Time Interval | Statistics for each study |              |              |              |
|-----------------------------------|----------|---------------|---------------------------|--------------|--------------|--------------|
|                                   |          |               | Odds ratio                | Lower limit  | Upper limit  | p-Value      |
| Marrama (2005)                    | IEP      | 1999          | 0.649                     | 0.336        | 1.256        | 0.199        |
| Swai (2009)                       | IEP      | 2004          | 3.032                     | 0.160        | 57.520       | 0.460        |
| LaBeaud (2008)                    | IEP      | 2006          | 8.335                     | 1.959        | 35.460       | 0.004        |
| Muiruri (2015)                    | IEP      | 2006          | 3.596                     | 0.824        | 15.701       | 0.089        |
| Anyangu (2010)                    | Outbreak | 2006-2007     | 2.060                     | 1.408        | 3.014        | 0.000        |
| Al-Azraqi (2012)                  | IEP      | 2008          | 1.961                     | 1.073        | 3.582        | 0.028        |
| Gray (2015)                       | IEP      | 2010-2012     | 0.810                     | 0.428        | 1.535        | 0.519        |
| Sumaye (2015)                     | IEP      | 2012          | 1.081                     | 0.649        | 1.800        | 0.764        |
| Bett (2019)                       | IEP      | 2013-2014     | 1.908                     | 1.044        | 3.488        | 0.036        |
| Tigoi (2020)                      | IEP      | 2014-2015     | 1.380                     | 1.009        | 1.888        | 0.044        |
| Nyakarahuka (2018)                | IEP      | 2016          | 1.194                     | 0.684        | 2.084        | 0.533        |
| <b>Pooled OR (random effects)</b> |          |               | <b>1.457</b>              | <b>1.092</b> | <b>1.944</b> | <b>0.010</b> |

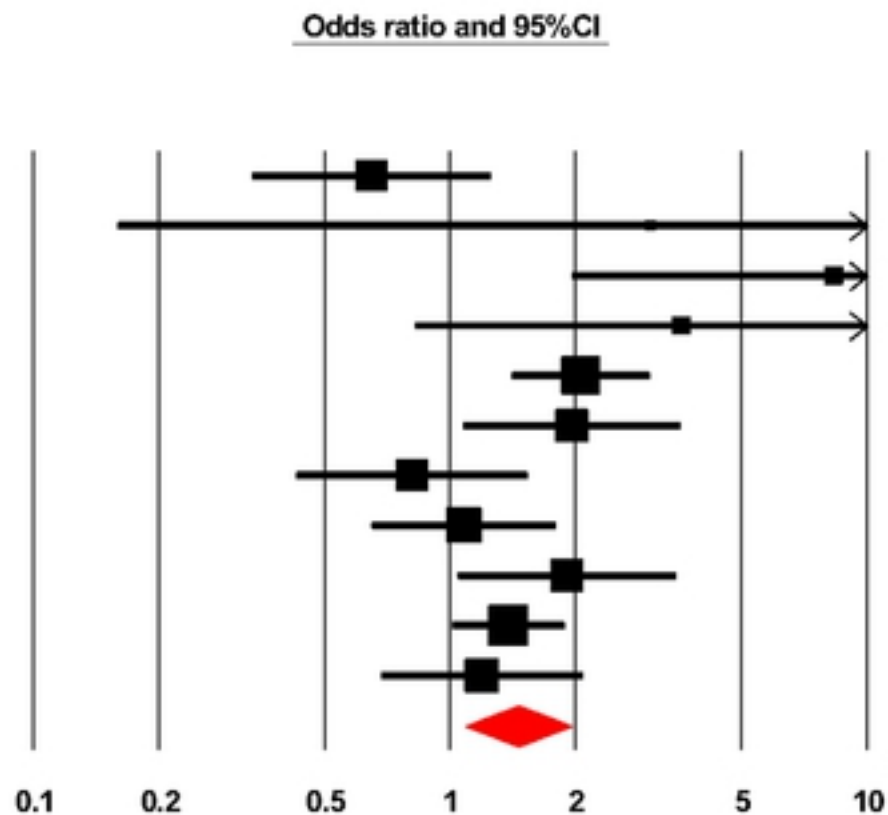

Less likely    More likely

Figure 8



| Study name                        | Period   | Time Interval | Statistics for each study |              |              |              |
|-----------------------------------|----------|---------------|---------------------------|--------------|--------------|--------------|
|                                   |          |               | Odds ratio                | Lower limit  | Upper limit  | p-Value      |
| LaBeaud (2008)                    | IEP      | 2006          | 2.780                     | 1.029        | 7.512        | 0.044        |
| Muiruri (2015)                    | IEP      | 2006          | 5.320                     | 2.491        | 11.361       | 0.000        |
| Anyangu (2010)                    | Outbreak | 2006-2007     | 3.830                     | 1.619        | 9.062        | 0.002        |
| Al-Azraqi (2012)                  | IEP      | 2008          | 11.583                    | 6.950        | 19.306       | 0.000        |
| Archer (2011)                     | Outbreak | 2008          | 0.715                     | 0.114        | 4.477        | 0.720        |
| LaBeaud (2011)                    | IEP      | 2009          | 3.490                     | 1.522        | 8.002        | 0.003        |
| LaBeaud (2015)                    | IEP      | 2011          | 5.310                     | 3.389        | 8.319        | 0.000        |
| Lernout (2013)                    | IEP      | 2011          | 11.120                    | 1.101        | 112.357      | 0.041        |
| Memish (2015)                     | IEP      | 2012          | 3.200                     | 1.168        | 8.764        | 0.024        |
| Sumaye (2015)                     | IEP      | 2012          | 2.020                     | 1.151        | 3.547        | 0.014        |
| Msimang (2019)                    | IEP      | 2015-2016     | 1.724                     | 0.965        | 3.079        | 0.066        |
| <b>Pooled OR (random effects)</b> |          |               | <b>3.646</b>              | <b>2.321</b> | <b>5.728</b> | <b>0.000</b> |

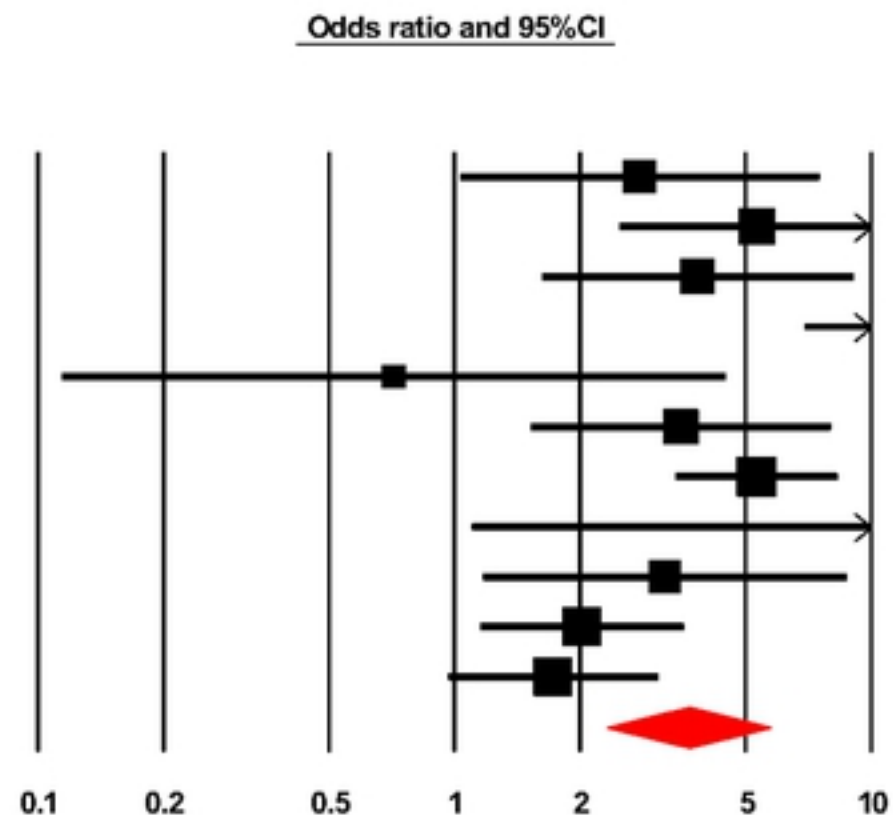

**Less likely    More likely**

Figure 9

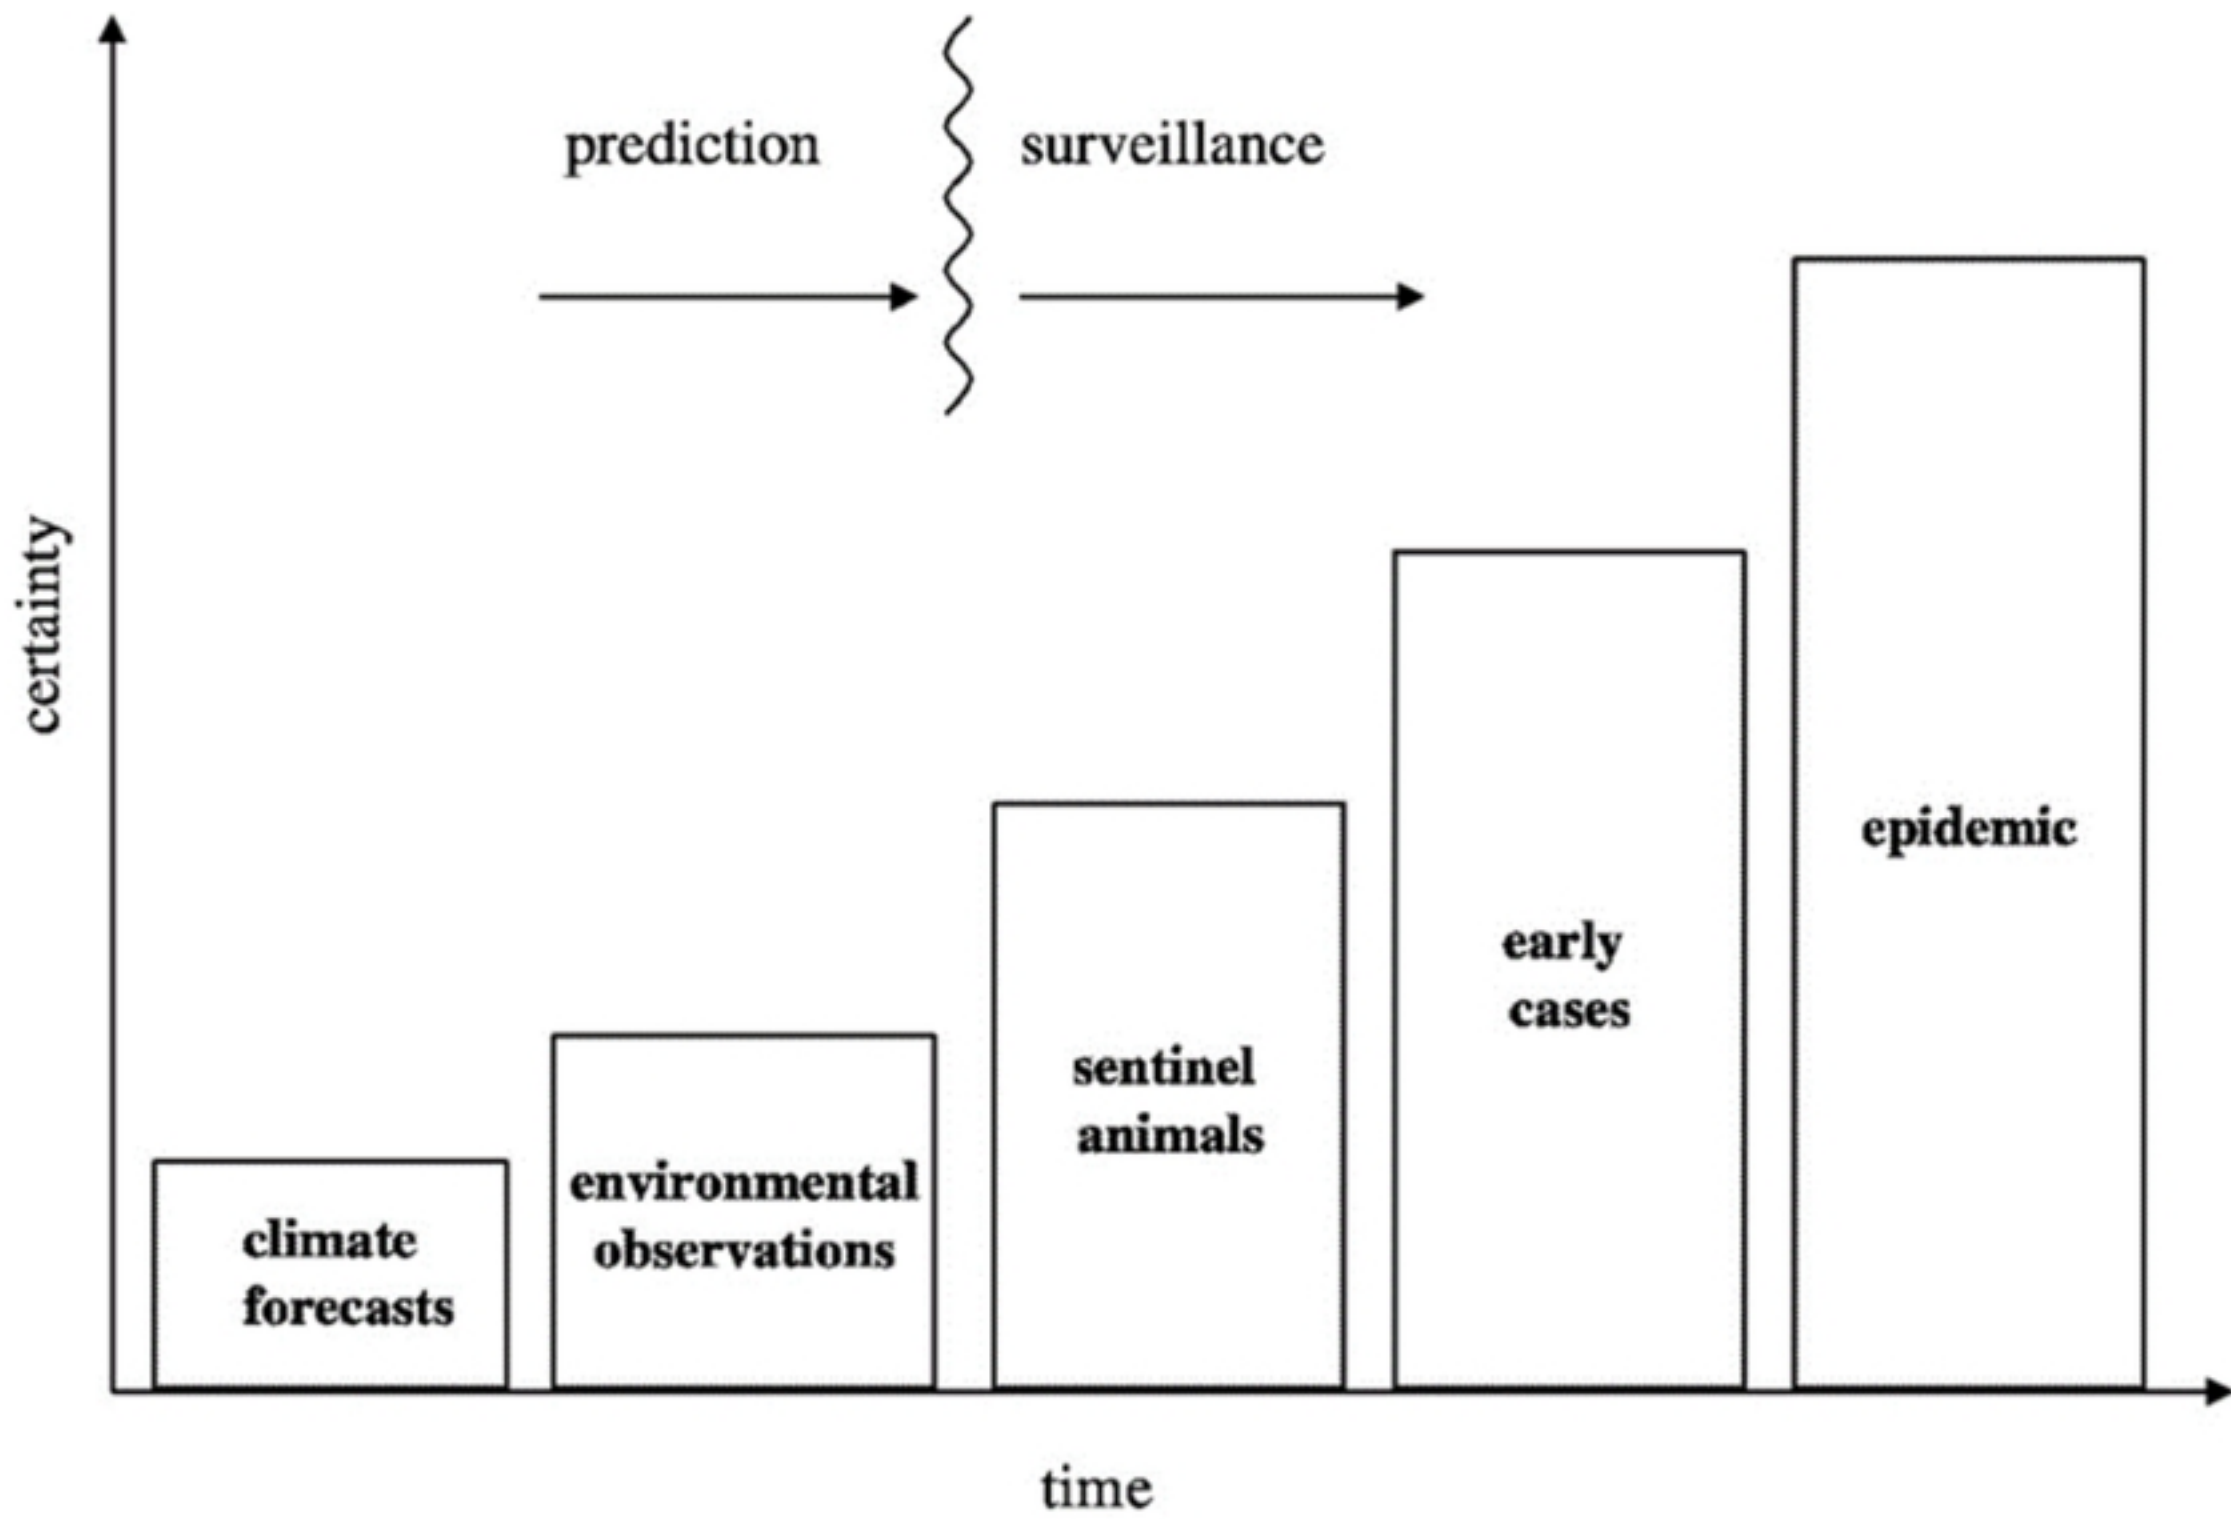

Figure 10
