# Supplementary material for: Paving the way for human vaccination against Rift Valley fever virus: A systematic literature review of RVFV epidemiology from 1999 to 2021
Source: bioRxiv or medRxiv preprint supplement (doi:10.1101/2021.09.29.21264307), 2021-12-23

# Odds Ratio of RVFV Infection via Sheltering Livestock

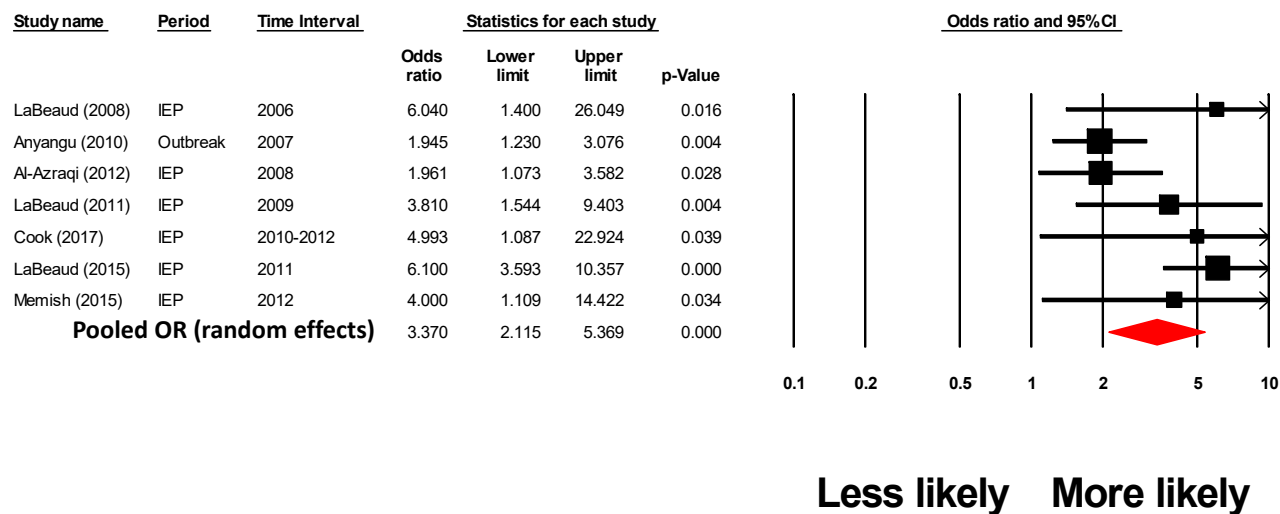

Supplement: Supplementary file [file media-2.pdf]
